# Supplementary material for: Analysis of pesticides, veterinary drugs, and environmental contaminants in goat and lamb by the QuEChERSER mega-method
Source: Royal Society of Chemistry journal article supplement (doi:10.1039/d2ay00713d), 2022-01-01
Supplement: d2ay00713d1.pdf [file d2ay00713d1.pdf]

## Supplementary information for:

### Analysis of pesticides, veterinary drugs, and environmental contaminants in goat and lamb by the QuEChERSER mega-method

Ederina Ninga,<sup>a,#</sup> Steven J. Lehotay,<sup>b,\*</sup> Yelena Sapozhnikova,<sup>b</sup>  
Alan R. Lightfield,<sup>b</sup> Gary D. Strahan,<sup>b</sup> and Sergio H. Monteiro<sup>c</sup>

<sup>a</sup> Department of Toxicology and Residues Monitoring, Food Safety and Veterinary Institute, Tirana, Albania

<sup>b</sup> USDA Agricultural Research Service, Eastern Regional Research Center; 600 East Mermaid Lane; Wyndmoor, PA 19038; USA

<sup>c</sup> Pesticide Residue Laboratory, Environmental Protection Research Center, Biological Institute, Sao Paulo, Brazil

# Current affiliation: National Food Institute, Technical University of Denmark, 2800 Kgs, Lyngby, Denmark

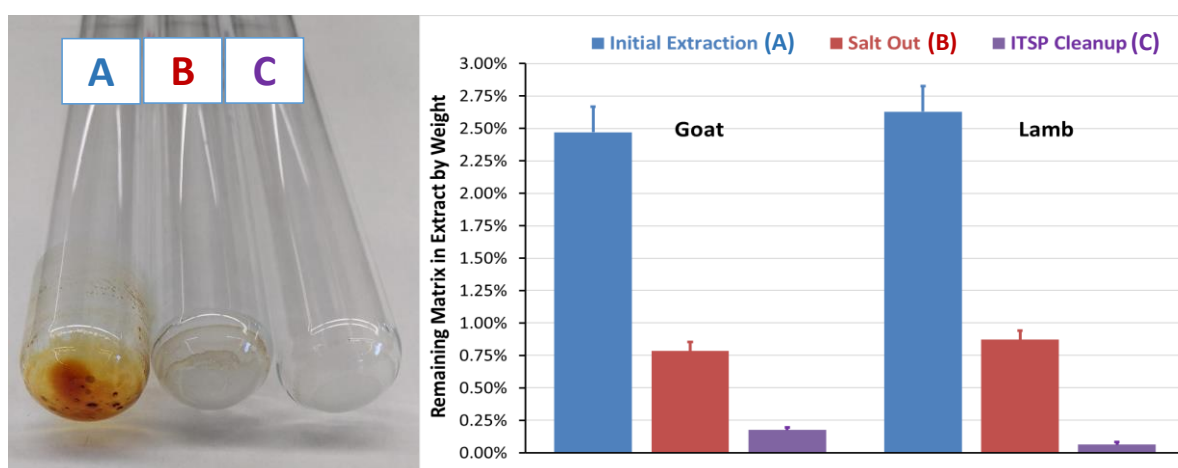

**Fig. S1** Left) image of the dried extracts in QuEChERSER after (A) the initial extraction step, (B) salting out with 1 g 4/1 (w/w) anhydrous  $MgSO_4/NaCl$ , and (C) SPE cleanup with 20/12/12/1 (w/w) anhydrous  $MgSO_4/PSA/C18/CarbonX$  sorbent. Right) co-extracted amounts for each step per 1 g equivalent sample for goat and lamb ( $n = 10$  each).

**Table S1.** List of targeted analytes in the study, their class, function, chemical formula, molecular weight (MW), octanol/water partitioning coefficient ( $K_{ow}$ ), and acid dissociation constant ( $pK_a$ ); spiking levels (X) at 0.5X, 1X, 1.5X, and 2X, n = 10 each in each matrix.

| No. | 1X<br>(ng/g) | Analyte                     | Class                 | Function          | Chemical<br>formula                                                           | MW<br>(g/mol) | Log<br>$K_{ow}$ | $pK_a$ |
|-----|--------------|-----------------------------|-----------------------|-------------------|-------------------------------------------------------------------------------|---------------|-----------------|--------|
| 1   | 20           | Acephate                    | Organophosphorus      | Insecticide       | C <sub>4</sub> H <sub>10</sub> NO <sub>3</sub> PS                             | 183.2         | -0.85           | 8.35   |
| 2   | 50           | Acetamiprid                 | Neonicotinoid         | Insecticide       | C <sub>10</sub> H <sub>11</sub> ClN <sub>4</sub>                              | 222.7         | 0.8             | 0.7    |
| 3   | 10           | Alachlor                    | Acetamide             | Herbicide         | C <sub>14</sub> H <sub>20</sub> ClNO <sub>2</sub>                             | 269.8         | 3.09            | -      |
| 4   | 100          | Albendazole                 | Benzimidazole         | Anthelmintic      | C <sub>12</sub> H <sub>15</sub> N <sub>3</sub> O <sub>2</sub> S               | 265.3         | 1.27            | -      |
| 5   | 100          | Albendazole sulfone         | Benzimidazole         | Metabolite        | C <sub>12</sub> H <sub>15</sub> N <sub>3</sub> O <sub>4</sub> S               | 297.3         | -               | -      |
| 6   | 100          | Albendazole sulfoxide       | Benzimidazole         | Metabolite        | C <sub>12</sub> H <sub>15</sub> N <sub>3</sub> O <sub>3</sub> S               | 281.3         | 1.27            | -      |
| 7   | 100          | Albendazole, 2-aminosulfone | Benzimidazole         | Metabolite        | C <sub>10</sub> H <sub>13</sub> N <sub>3</sub> O <sub>2</sub> S               | 239.3         | -               | -      |
| 8   | 10           | Aldicarb sulfone            | Carbamate             | Metabolite        | C <sub>7</sub> H <sub>14</sub> N <sub>2</sub> O <sub>4</sub> S                | 222.3         | -0.57           | -      |
| 9   | 10           | Aldicarb sulfoxide          | Carbamate             | Metabolite        | C <sub>7</sub> H <sub>14</sub> N <sub>2</sub> O <sub>3</sub> S                | 206.3         | -1.12           | -      |
| 10  | 200          | Aldrin                      | Organochlorine        | Insecticide       | C <sub>12</sub> H <sub>8</sub> Cl <sub>6</sub>                                | 364.9         | 5.31            | -      |
| 11  | 10           | Atrazine                    | Triazine              | Herbicide         | C <sub>8</sub> H <sub>14</sub> ClN <sub>5</sub>                               | 215.7         | 2.5             | 1.6    |
| 12  | 10           | Atrazine-desethyl           | Triazine              | Metabolite        | C <sub>6</sub> H <sub>10</sub> ClN <sub>5</sub>                               | 187           | 1.5             | 1.3    |
| 13  | 10           | Azinphos-ethyl              | Organophosphorus      | Insecticide       | C <sub>12</sub> H <sub>16</sub> N <sub>3</sub> O <sub>3</sub> PS <sub>2</sub> | 345.4         | 3.18            | -      |
| 14  | 10           | Azinphos-methyl             | Organophosphorus      | Insecticide       | C <sub>10</sub> H <sub>12</sub> N <sub>3</sub> O <sub>3</sub> PS <sub>2</sub> | 317.3         | 2.96            | -      |
| 15  | 10           | Azoxystrobin                | Strobilurin           | Fungicide         | C <sub>22</sub> H <sub>17</sub> N <sub>3</sub> O <sub>5</sub>                 | 403.4         | 2.5             | -      |
| 16  | 100          | Bacitracin                  | Cyclic peptide        | Antibiotic        | C <sub>66</sub> H <sub>103</sub> N <sub>17</sub> O <sub>16</sub> S            | 1422.7        | -0.8            | -      |
| 17  | 50           | Benoxacor                   | Benzoxazine           | Herbicide safener | C <sub>11</sub> H <sub>11</sub> Cl <sub>2</sub> NO <sub>2</sub>               | 260.1         | 2.6             | -      |
| 18  | 20           | Bentazon                    | Benzothiazinone       | Herbicide         | C <sub>10</sub> H <sub>12</sub> N <sub>2</sub> O <sub>3</sub> S               | 240.3         | 2.34            | 3.3    |
| 19  | 20           | Bifenazate                  | Hydrazine carboxylate | Insecticide       | C <sub>17</sub> H <sub>20</sub> N <sub>2</sub> O <sub>3</sub>                 | 300.4         | 3.4             | 12.94  |
| 20  | 100          | Bifenthrin                  | Pyrethroid            | Insecticide       | C <sub>23</sub> H <sub>22</sub> ClF <sub>3</sub> O <sub>2</sub>               | 422.9         | 6.6             |        |
| 21  | 10           | Bispyribac                  | Pyrimidinyl carboxy   | Herbicide         | C <sub>19</sub> H <sub>18</sub> N <sub>4</sub> O <sub>8</sub>                 | 430.4         | -1.03           | 3.05   |
| 22  | 10           | Bitertanol                  | Triazole              | Fungicide         | C <sub>20</sub> H <sub>23</sub> N <sub>3</sub> O <sub>2</sub>                 | 337.4         | -               | -      |
| 23  | 10           | Bithionol                   | Diphenyl              | Anthelmintic      | C <sub>12</sub> H <sub>6</sub> Cl <sub>4</sub> O <sub>2</sub> S               | 356           | 5.91            | 4.82   |
| 24  | 10           | Boscalid                    | Carboxamide           | Fungicide         | C <sub>18</sub> H <sub>12</sub> Cl <sub>2</sub> N <sub>2</sub> O              | 343.2         | 2.96            | -      |
| 25  | 10           | Brombuterol                 | $\beta$ -Agonist      | Growth promoter   | C <sub>12</sub> H <sub>18</sub> Br <sub>2</sub> N <sub>2</sub> O              | 366.1         | -               | -      |
| 26  | 10           | Bromchlorbuterol            | $\beta$ -Agonist      | Growth promoter   | C <sub>12</sub> H <sub>18</sub> BrClN <sub>2</sub> O                          | 321.6         | -               | -      |

| No. | 1X<br>(ng/g) | Analyte                     | Class            | Function        | Chemical<br>formula                                                                          | MW<br>(g/mol) | Log<br>K <sub>ow</sub> | pK <sub>a</sub> |
|-----|--------------|-----------------------------|------------------|-----------------|----------------------------------------------------------------------------------------------|---------------|------------------------|-----------------|
| 27  | 10           | Bromopropylate              | Benzilate        | Acaricide       | C <sub>17</sub> H <sub>16</sub> Br <sub>2</sub> O <sub>3</sub>                               | 428.1         | 5.4                    | -               |
| 28  | 50           | Buprofezin                  | Thiadiazine      | Insecticide     | C <sub>16</sub> H <sub>23</sub> N <sub>3</sub> OS                                            | 305.4         | 4.93                   | 6.7             |
| 29  | 10           | Cambendazole                | Benzimidazole    | Anthelmintic    | C <sub>14</sub> H <sub>14</sub> N <sub>4</sub> O <sub>2</sub> S                              | 302.4         | -                      | -               |
| 30  | 10           | Carazolol                   | Beta-Blocker     | Tranquilizer    | C <sub>18</sub> H <sub>22</sub> N <sub>2</sub> O <sub>2</sub>                                | 298.4         | -                      | -               |
| 31  | 10           | Carbadox                    | Carboxylate      | Antibiotic      | C <sub>11</sub> H <sub>10</sub> N <sub>4</sub> O <sub>4</sub>                                | 262.2         | 0.13                   | -               |
| 32  | 10           | Carbadox metabolite (2-QCA) | Carboxylate      | Metabolite      | C <sub>9</sub> H <sub>6</sub> N <sub>2</sub> O <sub>2</sub>                                  | 174.2         | -                      | -               |
| 33  | 50           | Carbaryl                    | Carbamate        | Insecticide     | C <sub>12</sub> H <sub>11</sub> NO <sub>2</sub>                                              | 201.2         | 2.36                   | -               |
| 34  | 10           | Carbofuran                  | Carbamate        | Insecticide     | C <sub>12</sub> H <sub>15</sub> NO <sub>3</sub>                                              | 221.3         | 1.8                    | -               |
| 35  | 20           | Carbophenothion             | Organophosphorus | Insecticide     | C <sub>11</sub> H <sub>16</sub> ClO <sub>2</sub> PS <sub>3</sub>                             | 342.9         | 5.33                   | -               |
| 36  | 50           | Carboxin                    | Anilide          | Fungicide       | C <sub>12</sub> H <sub>13</sub> NO <sub>2</sub> S                                            | 235.3         | 2.3                    | -               |
| 37  | 10           | Carfentrazone               | Triazolone       | Herbicide       | C <sub>13</sub> H <sub>10</sub> Cl <sub>2</sub> F <sub>3</sub> N <sub>3</sub> O <sub>3</sub> | 384.1         | -                      | -               |
| 38  | 100          | Cefazolin                   | β-Lactam         | Antibiotic      | C <sub>14</sub> H <sub>14</sub> N <sub>8</sub> O <sub>4</sub> S <sub>3</sub>                 | 454.5         | 0.58                   | 3.6             |
| 39  | 200          | Chlorantraniliprole         | Carboxamide      | Insecticide     | C <sub>18</sub> H <sub>14</sub> BrCl <sub>2</sub> N <sub>5</sub> O <sub>2</sub>              | 483.1         | 2.76                   | 10.88           |
| 40  | 50           | <i>cis</i> -Chlordane       | Organochlorine   | Insecticide     | C <sub>10</sub> H <sub>6</sub> Cl <sub>8</sub>                                               | 409.8         | 5.56                   | -               |
| 41  | 50           | <i>trans</i> -Chlordane     | Organochlorine   | Insecticide     | C <sub>10</sub> H <sub>6</sub> Cl <sub>8</sub>                                               | 409.8         | -                      | -               |
| 42  | 10           | Chlorfenvinphos             | Organophosphorus | Insecticide     | C <sub>12</sub> H <sub>14</sub> Cl <sub>3</sub> O <sub>4</sub> P                             | 359.6         | 3.81                   | -               |
| 43  | 20           | Chlorimuron                 | Sulfonylurea     | Herbicide       | C <sub>13</sub> H <sub>11</sub> ClN <sub>4</sub> O <sub>6</sub> S                            | 386.8         | -                      | -               |
| 44  | 50           | Chlorpropham                | Carbamate        | Herbicide       | C <sub>10</sub> H <sub>12</sub> ClNO <sub>2</sub>                                            | 213.7         | 3.76                   | -               |
| 45  | 10           | Chlorpyrifos                | Organophosphorus | Insecticide     | C <sub>9</sub> H <sub>11</sub> Cl <sub>3</sub> NO <sub>3</sub> PS                            | 350.6         | 4.7                    | -               |
| 46  | 10           | Chlorpyrifos-methyl         | Organophosphorus | Insecticide     | C <sub>7</sub> H <sub>7</sub> Cl <sub>3</sub> NO <sub>3</sub> PS                             | 322.6         | 4.31                   | -               |
| 47  | 100          | Chlortetracycline           | Tetracycline     | Antibiotic      | C <sub>22</sub> H <sub>23</sub> ClN <sub>2</sub> O <sub>8</sub>                              | 478.9         | -                      | 7.435           |
| 48  | 10           | Cimaterol                   | β-Agonist        | Growth promoter | C <sub>12</sub> H <sub>17</sub> N <sub>3</sub> O                                             | 219.3         | -                      | -               |
| 49  | 100          | Ciprofloxacin               | Fluoroquinolone  | Antibiotic      | C <sub>17</sub> H <sub>18</sub> FN <sub>3</sub> O <sub>3</sub>                               | 331.3         | 0.28                   | 6.09            |
| 50  | 100          | Ciprofloxacin, desethylene  | Fluoroquinolone  | Metabolite      | C <sub>20</sub> H <sub>24</sub> FN <sub>3</sub> O <sub>5</sub>                               | 405.4         | -                      | -               |
| 51  | 10           | Clenbuterol                 | β-Agonist        | Growth promoter | C <sub>12</sub> H <sub>18</sub> Cl <sub>2</sub> N <sub>2</sub> O                             | 277.2         | -                      | -               |
| 52  | 10           | Clencyclohexerol            | β-Agonist        | Growth promoter | C <sub>14</sub> H <sub>20</sub> Cl <sub>2</sub> N <sub>2</sub> O <sub>2</sub>                | 319.2         | -                      | -               |
| 53  | 10           | Clenpenterol                | β-Agonist        | Growth promoter | C <sub>13</sub> H <sub>20</sub> Cl <sub>2</sub> N <sub>2</sub> O                             | 291.2         | -                      | -               |
| 54  | 200          | Clethodim                   | Cyclohexanedione | Herbicide       | C <sub>17</sub> H <sub>26</sub> ClNO <sub>3</sub> S                                          | 359.9         | 4.14                   | -               |
| 55  | 50           | Clofentezine                | Tetrazine        | Acaricide       | C <sub>14</sub> H <sub>8</sub> Cl <sub>2</sub> N <sub>4</sub>                                | 303.1         | 3.1                    | -               |

| No.   | 1X<br>(ng/g) | Analyte                            | Class            | Function          | Chemical<br>formula                                                                        | MW<br>(g/mol) | Log<br>K <sub>ow</sub> | pK <sub>a</sub> |
|-------|--------------|------------------------------------|------------------|-------------------|--------------------------------------------------------------------------------------------|---------------|------------------------|-----------------|
| 56    | 35           | Clorsulon                          | Sulfonamide      | Flukicide         | C <sub>8</sub> H <sub>8</sub> Cl <sub>3</sub> N <sub>3</sub> O <sub>4</sub> S <sub>2</sub> | 380.7         | -                      | -               |
| 57    | 10           | Coumaphos                          | Organophosphorus | Insecticide       | C <sub>14</sub> H <sub>16</sub> ClO <sub>5</sub> PS                                        | 362.8         | 4.13                   | -               |
| 58    | 10           | Cyazofamid                         | Imidazole        | Fungicide         | C <sub>13</sub> H <sub>13</sub> ClN <sub>4</sub> O <sub>2</sub> S                          | 324.8         | 3.2                    | -               |
| 59    | 50           | Cyfluthrin                         | Pyrethroid       | Insecticide       | C <sub>22</sub> H <sub>18</sub> Cl <sub>2</sub> FNO <sub>3</sub>                           | 434.3         | 6                      | -               |
| 60    | 500          | λ-Cyhalothrin                      | Pyrethroid       | Insecticide       | C <sub>23</sub> H <sub>19</sub> ClF <sub>3</sub> NO <sub>3</sub>                           | 449.9         | 7                      | -               |
| 61    | 10           | Cymoxanil                          | Urea             | Fungicide         | C <sub>7</sub> H <sub>10</sub> N <sub>4</sub> O <sub>3</sub>                               | 198.2         | 0.67                   | 9.7             |
| 62    | 100          | Cypermethrin                       | Pyrethroid       | Insecticide       | C <sub>22</sub> H <sub>19</sub> Cl <sub>2</sub> NO <sub>3</sub>                            | 416.3         | 6.6                    | -               |
| 63    | 100          | Cyphenothrin                       | Pyrethroid       | Insecticide       | C <sub>24</sub> H <sub>25</sub> NO <sub>3</sub>                                            | 375.5         | 6.29                   | -               |
| 64    | 50           | Cyproconazole                      | Triazole         | Fungicide         | C <sub>15</sub> H <sub>18</sub> ClN <sub>3</sub> O                                         | 291.8         | 2.9                    | -               |
| 65    | 200          | Danofloxacin                       | Fluoroquinolone  | Antibiotic        | C <sub>19</sub> H <sub>20</sub> FN <sub>3</sub> O <sub>3</sub>                             | 357.4         | -                      | -               |
| 66    | 100          | Dapsone                            | NSAID            | Anti-inflammatory | C <sub>12</sub> H <sub>12</sub> N <sub>2</sub> O <sub>2</sub> S                            | 248.3         | 0.97                   | 2.41            |
| 67,68 | 50           | <i>o,p'</i> -DDD, <i>p,p'</i> -DDD | Organochlorine   | Metabolite        | C <sub>14</sub> H <sub>10</sub> Cl <sub>4</sub>                                            | 320.0         | 5.38                   | -               |
| 69,70 | 50           | <i>o,p'</i> -DDE, <i>p,p'</i> -DDE | Organochlorine   | Metabolite        | C <sub>14</sub> H <sub>8</sub> Cl <sub>4</sub>                                             | 318.0         | 6.36                   | -               |
| 71,72 | 50           | <i>o,p'</i> -DDT, <i>p,p'</i> -DDT | Organochlorine   | Insecticide       | C <sub>14</sub> H <sub>9</sub> Cl <sub>5</sub>                                             | 354.5         | 5.92                   | -               |
| 73    | 30           | Deltamethrin                       | Pyrethroid       | Insecticide       | C <sub>22</sub> H <sub>19</sub> Br <sub>2</sub> NO <sub>3</sub>                            | 505.2         | 6.2                    | -               |
| 74    | 50           | Desmedipham                        | Carbamate        | Herbicide         | C <sub>16</sub> H <sub>16</sub> N <sub>2</sub> O <sub>4</sub>                              | 300.3         | 3.39                   | -               |
| 75    | 20           | Diazinon                           | Organophosphorus | Insecticide       | C <sub>12</sub> H <sub>21</sub> N <sub>2</sub> O <sub>3</sub> PS                           | 304.3         | 3.69                   | 2.6             |
| 76    | 10           | Dichlormid                         | Acetamide        | Herbicide safener | C <sub>8</sub> H <sub>11</sub> Cl <sub>2</sub> NO                                          | 207.0         | 1.84                   | -               |
| 77    | 10           | Dichlorvos                         | Organophosphorus | Insecticide       | C <sub>4</sub> H <sub>7</sub> Cl <sub>2</sub> O <sub>4</sub> P                             | 221.0         | 1.9                    | -               |
| 78    | 50           | Diclofenac                         | NSAID            | Anti-inflammatory | C <sub>14</sub> H <sub>11</sub> Cl <sub>2</sub> NO <sub>2</sub>                            | 296.1         | 4.51                   | 4.15            |
| 79    | 100          | Dicloxacillin                      | β-Lactam         | Antibiotic        | C <sub>19</sub> H <sub>17</sub> Cl <sub>2</sub> N <sub>3</sub> O <sub>5</sub> S            | 470.3         | 2.91                   | -               |
| 80    | 50           | Dicofol                            | Organochlorine   | Acaricide         | C <sub>14</sub> H <sub>9</sub> Cl <sub>5</sub> O                                           | 370.5         | 4.3                    | -               |
| 81    | 50           | Dicrotophos                        | Organophosphorus | Insecticide       | C <sub>8</sub> H <sub>16</sub> NO <sub>5</sub> P                                           | 237.2         | -0.35                  | -               |
| 82    | 200          | Dieldrin                           | Organochlorine   | Insecticide       | C <sub>12</sub> H <sub>8</sub> Cl <sub>6</sub> O                                           | 380.9         | 4.87                   | -               |
| 83    | 50           | Difenoconazole                     | Triazole         | Fungicide         | C <sub>19</sub> H <sub>17</sub> Cl <sub>2</sub> N <sub>3</sub> O <sub>3</sub>              | 406.3         | 4.36                   | -               |
| 84    | 300          | Difloxacin                         | Fluoroquinolone  | Antibiotic        | C <sub>21</sub> H <sub>19</sub> F <sub>2</sub> N <sub>3</sub> O <sub>3</sub>               | 399.4         | 0.89                   | -               |
| 85    | 100          | Diflubenzuron                      | Benzoylurea      | Insecticide       | C <sub>14</sub> H <sub>9</sub> ClF <sub>2</sub> N <sub>2</sub> O <sub>2</sub>              | 310.7         | 3.89                   | -               |
| 86    | 50           | Diflufenzopyr                      | Semi-carbazone   | Herbicide         | C <sub>15</sub> H <sub>12</sub> F <sub>2</sub> N <sub>4</sub> O <sub>3</sub>               | 334.3         | 0.03                   | -               |
| 87    | 50           | Dimethoate                         | Organophosphorus | Insecticide       | C <sub>5</sub> H <sub>12</sub> NO <sub>3</sub> PS <sub>2</sub>                             | 229.3         | 0.7                    | -               |

| No.     | 1X<br>(ng/g) | Analyte                | Class               | Function     | Chemical<br>formula                                                          | MW<br>(g/mol) | Log<br>K <sub>ow</sub> | pK <sub>a</sub> |
|---------|--------------|------------------------|---------------------|--------------|------------------------------------------------------------------------------|---------------|------------------------|-----------------|
| 88      | 10           | Dimethomorph           | Morpholine          | Fungicide    | C <sub>21</sub> H <sub>22</sub> ClNO <sub>4</sub>                            | 387.9         | 2.63                   | -               |
| 89      | 10           | Dimetridazole          | Nitroimidazole      | Antibiotic   | C <sub>5</sub> H <sub>7</sub> N <sub>3</sub> O <sub>2</sub>                  | 141.1         | -                      | -               |
| 90      | 10           | Dimetridazole, hydroxy | Nitroimidazole      | Metabolite   | C <sub>5</sub> H <sub>7</sub> N <sub>3</sub> O <sub>3</sub>                  | 157.1         | -                      | -               |
| 91      | 30           | Dimoxystrobin          | Strobilurin         | Fungicide    | C <sub>19</sub> H <sub>22</sub> N <sub>2</sub> O <sub>3</sub>                | 326.4         | 3.59                   | -               |
| 92      | 100          | Dinotefuran            | Neonicotinoid       | Insecticide  | C <sub>7</sub> H <sub>14</sub> N <sub>4</sub> O <sub>3</sub>                 | 202.2         | -0.54                  | 12.6            |
| 93      | 10           | Disulfoton             | Organophosphorus    | Insecticide  | C <sub>8</sub> H <sub>19</sub> O <sub>2</sub> PS <sub>3</sub>                | 274.4         | 4.02                   | -               |
| 94      | 50           | Diuron                 | Phenylurea          | Herbicide    | C <sub>9</sub> H <sub>10</sub> Cl <sub>2</sub> N <sub>2</sub> O              | 233.1         | 2.68                   | -               |
| 95      | 10           | DMPF (amitraz met.)*   | Amidine             | Metabolite   | C <sub>10</sub> H <sub>14</sub> N <sub>2</sub>                               | 162.2         | 2.34                   | -               |
| 96      | 100          | Doxycycline            | Tetracycline        | Antibiotic   | C <sub>22</sub> H <sub>24</sub> N <sub>2</sub> O <sub>8</sub>                | 444.4         | 0.63                   | 3.09            |
| 97      | 100          | Emamectin              | Macrocyclic lactone | Anthelmintic | C <sub>49</sub> H <sub>75</sub> NO <sub>13</sub>                             | 886.1         | 5                      | 4.2             |
| 98      | 50           | Endosulfan I           | Organochlorine      | Insecticide  | C <sub>9</sub> H <sub>6</sub> Cl <sub>6</sub> O <sub>3</sub> S               | 406.9         | 4.74                   | -               |
| 99      | 50           | Endosulfan II          | Organochlorine      | Insecticide  | C <sub>9</sub> H <sub>6</sub> Cl <sub>6</sub> O <sub>3</sub> S               | 406.9         | 4.79                   | -               |
| 100     | 50           | Endosulfan sulfate     | Organochlorine      | Insecticide  | C <sub>9</sub> H <sub>6</sub> Cl <sub>6</sub> O <sub>4</sub> S               | 423           | -                      | -               |
| 101     | 50           | Endrin                 | Organochlorine      | Insecticide  | C <sub>12</sub> H <sub>8</sub> Cl <sub>6</sub> O                             | 380.9         | 4.87                   | -               |
| 102     | 50           | Endrin ketone          | Organochlorine      | Metabolite   | C <sub>12</sub> H <sub>8</sub> Cl <sub>6</sub> O                             | 380.9         | 2.67                   | -               |
| 103     | 100          | Enrofloxacin           | Fluoroquinolone     | Antibiotic   | C <sub>19</sub> H <sub>22</sub> FN <sub>3</sub> O <sub>3</sub>               | 359.4         | -                      | -               |
| 104     | 10           | Epoxiconazole          | Triazole            | Fungicide    | C <sub>17</sub> H <sub>13</sub> ClFN <sub>3</sub> O                          | 329.8         | 3.3                    | -               |
| 105     | 200          | Erythromycin A         | Macrolide           | Antibiotic   | C <sub>37</sub> H <sub>67</sub> NO <sub>13</sub>                             | 733.9         | 2.6                    | 8.88            |
| 106,107 | 40           | Es+Fenvalerate         | Pyrethroid          | Insecticide  | C <sub>25</sub> H <sub>22</sub> ClNO <sub>3</sub>                            | 419.9         | -                      | -               |
| 108     | 10           | Ethalfuralin           | Dinitroaniline      | Herbicide    | C <sub>13</sub> H <sub>14</sub> F <sub>3</sub> N <sub>3</sub> O <sub>4</sub> | 333.3         | 5.11                   | -               |
| 109     | 10           | Ethion                 | Organophosphorus    | Insecticide  | C <sub>9</sub> H <sub>22</sub> O <sub>4</sub> P <sub>2</sub> S <sub>4</sub>  | 384.5         | 4.28                   | -               |
| 110     | 30           | Ethofumesate           | Benzofuran          | Herbicide    | C <sub>13</sub> H <sub>18</sub> O <sub>5</sub> S                             | 286.3         | 2.7                    | -               |
| 111     | 10           | Ethoprop               | Organophosphorus    | Insecticide  | C <sub>8</sub> H <sub>19</sub> O <sub>2</sub> PS <sub>2</sub>                | 242.3         | 3.1                    | -               |
| 112     | 500          | Etofenprox             | Pyrethroid          | Insecticide  | C <sub>25</sub> H <sub>28</sub> O <sub>3</sub>                               | 376.5         | 6.9                    | -               |
| 113     | 10           | Etrimfos               | Organophosphorus    | Insecticide  | C <sub>10</sub> H <sub>17</sub> N <sub>2</sub> O <sub>4</sub> PS             | 292.3         | 3.3                    | -               |
| 114     | 50           | Famphur                | Organophosphorus    | Insecticide  | C <sub>10</sub> H <sub>16</sub> NO <sub>5</sub> PS <sub>2</sub>              | 325.3         | 2.13                   | -               |
| 115     | 10           | Fenamidone             | Imidazole           | Fungicide    | C <sub>17</sub> H <sub>17</sub> N <sub>3</sub> OS                            | 311.4         | 2.8                    | -               |
| 116     | 20           | Fenamiphos             | Organophosphorus    | Insecticide  | C <sub>13</sub> H <sub>22</sub> NO <sub>3</sub> PS                           | 303.4         | 3.3                    | -               |
| 117     | 20           | Fenarimol              | Pyrimidine          | Fungicide    | C <sub>17</sub> H <sub>12</sub> Cl <sub>2</sub> N <sub>2</sub> O             | 331.2         | 3.69                   | -               |

| No.     | 1X<br>(ng/g) | Analyte               | Class            | Function           | Chemical<br>formula                                                             | MW<br>(g/mol) | Log<br>K <sub>ow</sub> | pK <sub>a</sub> |
|---------|--------------|-----------------------|------------------|--------------------|---------------------------------------------------------------------------------|---------------|------------------------|-----------------|
| 118     | 50           | Fenbendazole          | Benzimidazole    | Anthelmintic       | C <sub>15</sub> H <sub>13</sub> N <sub>3</sub> O <sub>2</sub> S                 | 299.3         | -                      | -               |
| 119     | 50           | Fenbendazole sulfone  | Benzimidazole    | Metabolite         | C <sub>15</sub> H <sub>13</sub> N <sub>3</sub> O <sub>4</sub> S                 | 331.3         | -                      | -               |
| 120     | 10           | Fenitrothion          | Organophosphorus | Insecticide        | C <sub>9</sub> H <sub>12</sub> NO <sub>5</sub> PS                               | 277.2         | 3.3                    | -               |
| 121     | 10           | Fenoterol             | β-Agonist        | Growth promoter    | C <sub>17</sub> H <sub>21</sub> NO <sub>4</sub>                                 | 303.3         | -                      | -               |
| 122     | 50           | Fenoxycarb            | Carbamate        | Insect growth reg. | C <sub>17</sub> H <sub>19</sub> NO <sub>4</sub>                                 | 301.4         | 4.07                   | -               |
| 123     | 50           | Fenpropathrin         | Pyrethroid       | Insecticide        | C <sub>22</sub> H <sub>23</sub> NO <sub>3</sub>                                 | 349.4         | 6                      | -               |
| 124     | 10           | Fenpyroximate         | Pyrazole         | Insecticide        | C <sub>24</sub> H <sub>27</sub> N <sub>3</sub> O <sub>4</sub>                   | 421.5         | 5.01                   | 1.5             |
| 125     | 50           | Fenthion              | Organophosphorus | Insecticide        | C <sub>10</sub> H <sub>15</sub> O <sub>3</sub> PS <sub>2</sub>                  | 278.3         | 4.84                   | -               |
| 126     | 50           | Fenthion sulfone      | Organophosphorus | Metabolite         | C <sub>10</sub> H <sub>15</sub> O <sub>5</sub> PS <sub>2</sub>                  | 310.3         | 1.82                   | -               |
| 127     | 5            | Fipronil              | Pyrazole         | Insecticide        | C <sub>12</sub> H <sub>4</sub> Cl <sub>2</sub> F <sub>6</sub> N <sub>4</sub> OS | 437.2         | 4                      | -               |
| 128     | 5            | Fipronil desufinyl    | Pyrazole         | Metabolite         | C <sub>12</sub> H <sub>4</sub> Cl <sub>2</sub> F <sub>6</sub> N <sub>4</sub>    | 389.1         | -                      | -               |
| 129     | 5            | Fipronil sulfide      | Pyrazole         | Metabolite         | C <sub>12</sub> H <sub>4</sub> Cl <sub>2</sub> F <sub>6</sub> N <sub>4</sub> S  | 421.1         | -                      | -               |
| 130     | 100          | Florfenicol           | Phenicol         | Antibiotic         | C <sub>12</sub> H <sub>14</sub> Cl <sub>2</sub> FNO <sub>4</sub> S              | 358.2         | -                      | -               |
| 131     | 50           | Flubendazole          | Benzimidazole    | Anthelmintic       | C <sub>16</sub> H <sub>12</sub> FN <sub>3</sub> O <sub>3</sub>                  | 313.3         | -                      | -               |
| 132     | 50           | Flubendazole, 2-amino | Benzimidazole    | Metabolite         | C <sub>13</sub> H <sub>11</sub> N <sub>3</sub> S                                | 241.3         | -                      | -               |
| 133     | 40           | Fludioxonil           | Pyrrole          | Fungicide          | C <sub>12</sub> H <sub>6</sub> F <sub>2</sub> N <sub>2</sub> O <sub>2</sub>     | 248.2         | 4.12                   | -               |
| 134     | 50           | Flufenacet            | Acetamide        | Herbicide          | C <sub>14</sub> H <sub>13</sub> F <sub>4</sub> N <sub>3</sub> O <sub>2</sub> S  | 363.3         | 3.2                    | -               |
| 135     | 50           | Flufenoxuron          | Phenylurea       | Insecticide        | C <sub>21</sub> H <sub>11</sub> ClF <sub>6</sub> N <sub>2</sub> O <sub>3</sub>  | 488.8         | 4                      | -               |
| 136     | 200          | Flumequine            | Fluoroquinolone  | Antibiotic         | C <sub>14</sub> H <sub>12</sub> FNO <sub>3</sub>                                | 261.3         | 1.6                    | 6.5             |
| 137     | 800          | Fluopyram             | Benzamide        | Fungicide          | C <sub>16</sub> H <sub>11</sub> ClF <sub>6</sub> N <sub>2</sub> O               | 396.7         | -                      | -               |
| 138     | 20           | Fluoxastrobin         | Strobilurin      | Fungicide          | C <sub>21</sub> H <sub>16</sub> ClFN <sub>4</sub> O <sub>5</sub>                | 458.8         | 2.86                   | -               |
| 139     | 10           | Fluroxypyr-meptyl     | Pyridine         | Herbicide          | C <sub>15</sub> H <sub>21</sub> Cl <sub>2</sub> FN <sub>2</sub> O <sub>3</sub>  | 367.2         | 4.57                   | -               |
| 140     | 20           | Flusilazole           | Triazole         | Fungicide          | C <sub>16</sub> H <sub>15</sub> F <sub>2</sub> N <sub>3</sub> Si                | 315.4         | 3.87                   | 2.5             |
| 141     | 50           | Flutolanil            | Oxathiin         | Fungicide          | C <sub>17</sub> H <sub>16</sub> F <sub>3</sub> NO <sub>2</sub>                  | 323.3         | 3.17                   | -               |
| 142     | 10           | Flutriafol            | Triazole         | Fungicide          | C <sub>16</sub> H <sub>13</sub> F <sub>2</sub> N <sub>3</sub> O                 | 301.3         | 2.3                    | 2.3             |
| 143     | 20           | Fluxapyroxad          | Pyrazolium       | Fungicide          | C <sub>18</sub> H <sub>12</sub> F <sub>5</sub> N <sub>3</sub> O                 | 381.3         | 2.96                   | -               |
| 144     | 20           | Foramsulfuron         | Sulfonylurea     | Herbicide          | C <sub>17</sub> H <sub>20</sub> N <sub>6</sub> O <sub>7</sub> S                 | 452.5         | -0.78                  | 4.6             |
| 145-148 | 10           | HCHs (α, β, γ, δ)     | Organochlorine   | Insecticide        | C <sub>6</sub> H <sub>6</sub> Cl <sub>6</sub>                                   | 290.8         | 3.99                   | -               |
| 149     | 200          | Heptachlor            | Organochlorine   | Insecticide        | C <sub>10</sub> H <sub>5</sub> Cl <sub>7</sub>                                  | 373.3         | 4.4                    | -               |

| No. | 1X<br>(ng/g) | Analyte              | Class            | Function          | Chemical<br>formula                                                                         | MW<br>(g/mol) | Log<br>K <sub>ow</sub> | pK <sub>a</sub> |
|-----|--------------|----------------------|------------------|-------------------|---------------------------------------------------------------------------------------------|---------------|------------------------|-----------------|
| 150 | 200          | Heptachlor epoxide   | Organochlorine   | Metabolite        | C <sub>10</sub> H <sub>5</sub> Cl <sub>7</sub> O                                            | 389.3         | 4.24                   | -               |
| 151 | 5            | Hexachlorobenzene    | Organochlorine   | Fungicide         | C <sub>6</sub> Cl <sub>6</sub>                                                              | 284.8         | 5.66                   | -               |
| 152 | 10           | Hexaconazole         | Triazole         | Fungicide         | C <sub>14</sub> H <sub>17</sub> Cl <sub>2</sub> N <sub>3</sub> O                            | 314.2         | 3.9                    | -               |
| 153 | 50           | Hexythiazox          | Carboxamide      | Acaricide         | C <sub>17</sub> H <sub>21</sub> ClN <sub>2</sub> O <sub>2</sub> S                           | 352.9         | 2.67                   | -               |
| 154 | 50           | Imazalil             | Imidazole        | Fungicide         | C <sub>14</sub> H <sub>14</sub> Cl <sub>2</sub> N <sub>2</sub> O                            | 297.2         | 2.63                   | 6.49            |
| 155 | 50           | Imazapyr             | Imidazolinone    | Herbicide         | C <sub>13</sub> H <sub>15</sub> N <sub>3</sub> O <sub>3</sub>                               | 261.3         | 0.11                   | 3.6             |
| 156 | 100          | Imidacloprid         | Neonicotinoid    | Insecticide       | C <sub>9</sub> H <sub>10</sub> ClN <sub>5</sub> O <sub>2</sub>                              | 255.7         | 0.57                   | -               |
| 157 | 50           | Indoxacarb           | Oxadiazine       | Insecticide       | C <sub>22</sub> H <sub>17</sub> ClF <sub>3</sub> N <sub>3</sub> O <sub>7</sub>              | 527.8         | 4.65                   | -               |
| 158 | 100          | Iprodione            | Dicarboximide    | Fungicide         | C <sub>13</sub> H <sub>13</sub> Cl <sub>2</sub> N <sub>3</sub> O <sub>3</sub>               | 330.2         | 3                      | -               |
| 159 | 50           | Iprovalicarb         | Carbamate        | Fungicide         | C <sub>18</sub> H <sub>28</sub> N <sub>2</sub> O <sub>3</sub>                               | 320.4         | 3.18                   | -               |
| 160 | 50           | Isocarbofos          | Organophosphorus | Insecticide       | C <sub>11</sub> H <sub>16</sub> NO <sub>4</sub> PS                                          | 289.3         | 1.65                   | -               |
| 161 | 50           | Kresoxim-methyl      | Strobilurin      | Fungicide         | C <sub>18</sub> H <sub>19</sub> NO <sub>4</sub>                                             | 313.3         | 3.4                    | -               |
| 162 | 50           | Lasalosid A          | Coccidiostat     | Antibiotic        | C <sub>34</sub> H <sub>54</sub> O <sub>8</sub>                                              | 590.8         | -                      | -               |
| 163 | 10           | Levamisole           | Thiazole         | Anthelmintic      | C <sub>11</sub> H <sub>12</sub> N <sub>2</sub> S                                            | 204.3         | 1.84                   | -               |
| 164 | 100          | Lincomycin           | Macrolide        | Antibiotic        | C <sub>18</sub> H <sub>34</sub> N <sub>2</sub> O <sub>6</sub> S                             | 406.5         | 0.56                   | -               |
| 165 | 10           | Linuron              | Phenylurea       | Herbicide         | C <sub>9</sub> H <sub>10</sub> Cl <sub>2</sub> N <sub>2</sub> O <sub>2</sub>                | 249.1         | 3                      | -               |
| 166 | 30           | Lufenuron            | Benzoylurea      | Insecticide       | C <sub>17</sub> H <sub>8</sub> Cl <sub>2</sub> F <sub>8</sub> N <sub>2</sub> O <sub>3</sub> | 511.2         | 5.12                   | 10.18           |
| 167 | 10           | Mabuterol            | β-Agonist        | Growth promoter   | C <sub>13</sub> H <sub>18</sub> ClF <sub>3</sub> N <sub>2</sub> O                           | 310.7         | -                      | -               |
| 168 | 20           | Malathion            | Organophosphorus | Insecticide       | C <sub>10</sub> H <sub>19</sub> O <sub>6</sub> PS <sub>2</sub>                              | 330.4         | 2.75                   | -               |
| 169 | 20           | Malathion oxon       | Organophosphorus | Metabolite        | C <sub>10</sub> H <sub>19</sub> O <sub>7</sub> PS                                           | 314.3         | 2.07                   | -               |
| 170 | 60           | Mebendazole          | Benzimidazole    | Anthelmintic      | C <sub>16</sub> H <sub>13</sub> N <sub>3</sub> O <sub>3</sub>                               | 295.3         | 2.83                   | -               |
| 171 | 60           | Mebendazole, 2-amino | Benzimidazole    | Metabolite        | C <sub>14</sub> H <sub>11</sub> N <sub>3</sub> O                                            | 237.3         | -                      | -               |
| 172 | 20           | Meloxicam            | NSAID            | Anti-inflammatory | C <sub>14</sub> H <sub>13</sub> N <sub>3</sub> O <sub>4</sub> S <sub>2</sub>                | 351.4         | 0.1                    | 4.08            |
| 173 | 50           | Mephosfolan          | Organophosphorus | Insecticide       | C <sub>8</sub> H <sub>16</sub> NO <sub>3</sub> PS <sub>2</sub>                              | 269.3         | 1.04                   | -               |
| 174 | 10           | Metalaxyl            | Benzenoid        | Fungicide         | C <sub>15</sub> H <sub>21</sub> NO <sub>4</sub>                                             | 279.3         | 1.65                   | -               |
| 175 | 50           | Metazachlor          | Acetamide        | Herbicide         | C <sub>14</sub> H <sub>16</sub> ClN <sub>3</sub> O                                          | 277.8         | 2.49                   | -               |
| 176 | 20           | Metconazole          | Triazole         | Fungicide         | C <sub>17</sub> H <sub>22</sub> ClN <sub>3</sub> O                                          | 319.8         | 3.85                   | -               |
| 177 | 10           | Methamidophos        | Organophosphorus | Insecticide       | C <sub>2</sub> H <sub>8</sub> NO <sub>2</sub> PS                                            | 141.1         | -0.8                   | -               |
| 178 | 20           | Methidathion         | Organophosphorus | Insecticide       | C <sub>6</sub> H <sub>11</sub> N <sub>2</sub> O <sub>4</sub> PS <sub>3</sub>                | 302.3         | 2.2                    | -               |

| No. | 1X<br>(ng/g) | Analyte              | Class            | Function          | Chemical<br>formula                                                           | MW<br>(g/mol) | Log<br>K <sub>ow</sub> | pK <sub>a</sub> |
|-----|--------------|----------------------|------------------|-------------------|-------------------------------------------------------------------------------|---------------|------------------------|-----------------|
| 179 | 50           | Methiocarb           | Carbamate        | Insecticide       | C <sub>11</sub> H <sub>15</sub> NO <sub>2</sub> S                             | 225.3         | 3.18                   | -               |
| 180 | 50           | Methiocarb sulfone   | Carbamate        | Metabolite        | C <sub>11</sub> H <sub>15</sub> NO <sub>4</sub> S                             | 257.3         | 1.26                   | -               |
| 181 | 50           | Methiocarb sulfoxide | Carbamate        | Metabolite        | C <sub>11</sub> H <sub>15</sub> NO <sub>3</sub> S                             | 241.3         | 0.61                   | -               |
| 182 | 10           | Methomyl             | Carbamate        | Insecticide       | C <sub>5</sub> H <sub>10</sub> N <sub>2</sub> O <sub>2</sub> S                | 162.2         | 0.09                   | -               |
| 183 | 100          | Metribuzin           | Triazinone       | Herbicide         | C <sub>8</sub> H <sub>14</sub> N <sub>4</sub> OS                              | 214.3         | 1.7                    | 1.0             |
| 184 | 10           | Metsulfuron-methyl   | Sulfonylurea     | Herbicide         | C <sub>14</sub> H <sub>15</sub> N <sub>5</sub> O <sub>6</sub> S               | 381.4         | 0.01                   | 3.8             |
| 185 | 10           | Mirex                | Organochlorine   | Insecticide       | C <sub>10</sub> Cl <sub>2</sub>                                               | 545.5         | 7.41                   | -               |
| 186 | 20           | Monensin             | Cocciostat       | Antibiotic        | C <sub>36</sub> H <sub>62</sub> O <sub>11</sub>                               | 670.9         | 5.43                   | 6.6             |
| 187 | 50           | Monocrotophos        | Organophosphorus | Insecticide       | C <sub>7</sub> H <sub>14</sub> NO <sub>5</sub> P                              | 223.2         | -0.22                  | -               |
| 188 | 10           | Monuron              | Phenylurea       | Herbicide         | C <sub>9</sub> H <sub>11</sub> ClN <sub>2</sub> O                             | 198.7         | 1.46                   | -               |
| 189 | 100          | Morantel             | Pyrimidine       | Anthelmintic      | C <sub>12</sub> H <sub>16</sub> N <sub>2</sub> S                              | 220.3         | -                      | -               |
| 190 | 10           | Myclobutanil         | Triazole         | Fungicide         | C <sub>15</sub> H <sub>17</sub> ClN <sub>4</sub>                              | 288.8         | 3.17                   | -               |
| 191 | 300          | Nafcillin            | β-Lactam         | Antibiotic        | C <sub>21</sub> H <sub>22</sub> N <sub>2</sub> O <sub>5</sub> S               | 414.5         | -                      | -               |
| 192 | 50           | Nalidixic acid       | Quinolone        | Antibiotic        | C <sub>12</sub> H <sub>12</sub> N <sub>2</sub> O <sub>3</sub>                 | 232.2         | 1.41                   | 8.6             |
| 193 | 10           | Naproxen             | NSAID            | Anti-inflammatory | C <sub>14</sub> H <sub>14</sub> O <sub>3</sub>                                | 230.3         | 3.18                   | 4.15            |
| 194 | 100          | Nitenpyram           | Neonicotinoid    | Insecticide       | C <sub>11</sub> H <sub>15</sub> ClN <sub>4</sub> O <sub>2</sub>               | 270.7         | -0.64                  | -               |
| 195 | 400          | Nitroxinil           | Nitrobenzotrile  | Anthelmintic      | C <sub>7</sub> H <sub>3</sub> IN <sub>2</sub> O <sub>3</sub>                  | 290.0         | -                      | -               |
| 196 | 10           | Norflurazon          | Pyridazinone     | Herbicide         | C <sub>12</sub> H <sub>9</sub> ClF <sub>3</sub> N <sub>3</sub> O              | 303.7         | 2.45                   | -               |
| 197 | 200          | Novaluron            | Benzoylurea      | Insecticide       | C <sub>17</sub> H <sub>9</sub> ClF <sub>8</sub> N <sub>2</sub> O <sub>4</sub> | 492.7         | 4.3                    | -               |
| 198 | 50           | Omethoate            | Organophosphorus | Insecticide       | C <sub>5</sub> H <sub>12</sub> NO <sub>4</sub> PS                             | 213.2         | -0.74                  | -               |
| 199 | 100          | Ormetoprim           | Pyrimidine       | Antibiotic        | C <sub>14</sub> H <sub>18</sub> N <sub>4</sub> O <sub>2</sub>                 | 274.3         | 1.23                   | -               |
| 200 | 300          | Oxacillin            | β-Lactam         | Antibiotic        | C <sub>19</sub> H <sub>19</sub> N <sub>3</sub> O <sub>5</sub> S               | 401.4         | 2.38                   | 2.72            |
| 201 | 50           | Oxadiazon            | Oxadiazole       | Herbicide         | C <sub>15</sub> H <sub>18</sub> Cl <sub>2</sub> N <sub>2</sub> O <sub>3</sub> | 345.2         | 5.33                   | -               |
| 202 | 50           | Oxfendazole          | Benzimidazole    | Anthelmintic      | C <sub>15</sub> H <sub>13</sub> N <sub>3</sub> O <sub>3</sub> S               | 315.3         | -                      | -               |
| 203 | 100          | Oxibendazole         | Benzimidazole    | Anthelmintic      | C <sub>12</sub> H <sub>15</sub> N <sub>3</sub> O <sub>3</sub>                 | 249.3         | -                      | -               |
| 204 | 200          | Oxolinic acid        | Quinolone        | Antibiotic        | C <sub>13</sub> H <sub>11</sub> NO <sub>5</sub>                               | 261.2         | 0.94                   | -               |
| 205 | 50           | Oxychlorane          | Organochlorine   | Metabolite        | C <sub>10</sub> H <sub>4</sub> Cl <sub>8</sub> O                              | 423.8         | 4.23                   | -               |
| 206 | 50           | Oxyfluorfen          | Diphenyl ether   | Herbicide         | C <sub>15</sub> H <sub>11</sub> ClF <sub>3</sub> NO <sub>4</sub>              | 361.7         | 4.86                   | -               |
| 207 | 100          | Oxytetracycline      | Tetracycline     | Antibiotic        | C <sub>22</sub> H <sub>24</sub> N <sub>2</sub> O <sub>9</sub>                 | 460.4         | -0.9                   | 3.27            |



| No. | 1X<br>(ng/g) | Analyte                          | Class               | Function     | Chemical<br>formula                                                            | MW<br>(g/mol) | Log<br>K <sub>ow</sub> | pK <sub>a</sub> |
|-----|--------------|----------------------------------|---------------------|--------------|--------------------------------------------------------------------------------|---------------|------------------------|-----------------|
| 208 | 500          | Paclobutrazol                    | Triazole            | Fungicide    | C <sub>15</sub> H <sub>20</sub> ClN <sub>3</sub> O                             | 293.8         | 3.11                   | -               |
| 209 | 50           | Parathion                        | Organophosphorus    | Insecticide  | C <sub>10</sub> H <sub>14</sub> NO <sub>5</sub> PS                             | 291.3         | 3.83                   | -               |
| 210 | 50           | Parathion-methyl                 | Organophosphorus    | Metabolite   | C <sub>8</sub> H <sub>10</sub> NO <sub>5</sub> PS                              | 263.2         | -                      | -               |
| 211 | 5            | PCB 28                           | Non-dioxin-like PCB | Env. Contam. | C <sub>12</sub> H <sub>7</sub> Cl <sub>3</sub>                                 | 257.5         | -                      | -               |
| 212 | 5            | PCB 52                           | Non-dioxin-like PCB | Env. Contam. | C <sub>12</sub> H <sub>6</sub> Cl <sub>4</sub>                                 | 292           | -                      | -               |
| 213 | 5            | PCB 77                           | Non-ortho PCB       | Env. Contam. | C <sub>12</sub> H <sub>6</sub> Cl <sub>4</sub>                                 | 292           | -                      | -               |
| 214 | 5            | PCB 81                           | Non-ortho PCB       | Env. Contam. | C <sub>12</sub> H <sub>6</sub> Cl <sub>4</sub>                                 | 292           | -                      | -               |
| 215 | 5            | PCB 101                          | Non-dioxin-like PCB | Env. Contam. | C <sub>12</sub> H <sub>5</sub> Cl <sub>5</sub>                                 | 326.4         | -                      | -               |
| 216 | 5            | PCB 105                          | Mono-ortho PCB      | Env. Contam. | C <sub>12</sub> H <sub>5</sub> Cl <sub>5</sub>                                 | 326.4         | -                      | -               |
| 217 | 5            | PCB 118                          | Mono-ortho PCB      | Env. Contam. | C <sub>12</sub> H <sub>5</sub> Cl <sub>5</sub>                                 | 326.4         | -                      | -               |
| 218 | 5            | PCB 123                          | Mono-ortho PCB      | Env. Contam. | C <sub>12</sub> H <sub>5</sub> Cl <sub>5</sub>                                 | 326.4         | -                      | -               |
| 219 | 5            | PCB 126                          | Non-ortho PCB       | Env. Contam. | C <sub>12</sub> H <sub>5</sub> Cl <sub>5</sub>                                 | 326.4         | -                      | -               |
| 220 | 5            | PCB 138                          | Non-dioxin-like PCB | Env. Contam. | C <sub>12</sub> H <sub>4</sub> Cl <sub>6</sub>                                 | 360.9         | -                      | -               |
| 221 | 5            | PCB 153                          | Non-dioxin-like PCB | Env. Contam. | C <sub>12</sub> H <sub>4</sub> Cl <sub>6</sub>                                 | 360.9         | -                      | -               |
| 222 | 5            | PCB 156                          | Mono-ortho PCB      | Env. Contam. | C <sub>12</sub> H <sub>4</sub> Cl <sub>6</sub>                                 | 360.9         | -                      | -               |
| 223 | 5            | PCB 157                          | Mono-ortho PCB      | Env. Contam. | C <sub>12</sub> H <sub>4</sub> Cl <sub>6</sub>                                 | 360.9         | -                      | -               |
| 224 | 5            | PCB 169                          | Non-ortho PCB       | Env. Contam. | C <sub>12</sub> H <sub>4</sub> Cl <sub>6</sub>                                 | 360.9         | -                      | -               |
| 225 | 5            | PCB 180                          | Non-dioxin-like PCB | Env. Contam. | C <sub>12</sub> H <sub>3</sub> Cl <sub>7</sub>                                 | 395.3         | -                      | -               |
| 226 | 5            | PCB 189                          | Mono-ortho PCB      | Env. Contam. | C <sub>12</sub> H <sub>3</sub> Cl <sub>7</sub>                                 | 395.3         | -                      | -               |
| 227 | 50           | Penconazole                      | Triazole            | Fungicide    | C <sub>13</sub> H <sub>15</sub> Cl <sub>2</sub> N <sub>3</sub>                 | 284.2         | 3.72                   | 1.51            |
| 228 | 10           | Pendimethalin                    | Dinitroaniline      | Herbicide    | C <sub>13</sub> H <sub>19</sub> N <sub>3</sub> O <sub>4</sub>                  | 281.3         | 5.2                    | 2.8             |
| 229 | 50           | Penicillin G                     | β-Lactam            | Antibiotic   | C <sub>16</sub> H <sub>18</sub> N <sub>2</sub> O <sub>4</sub> S                | 334.4         | 1.83                   | 2.74            |
| 230 | 20           | Penoxsulam                       | Triazopyrimidine    | Herbicide    | C <sub>16</sub> H <sub>14</sub> F <sub>5</sub> N <sub>5</sub> O <sub>5</sub> S | 483.4         | 1.13                   | 5.1             |
| 231 | 20           | Pentachloroaniline               | Organochlorine      | Metabolite   | C <sub>6</sub> H <sub>2</sub> Cl <sub>5</sub> N                                | 265.4         | 4.86                   | -               |
| 232 | 50           | Permethrins ( <i>cis+trans</i> ) | Pyrethroid          | Insecticide  | C <sub>21</sub> H <sub>20</sub> Cl <sub>2</sub> O <sub>3</sub>                 | 391.3         | 6.1                    | -               |
| 233 | 50           | Phenothrin                       | Pyrethroid          | Insecticide  | C <sub>23</sub> H <sub>26</sub> O <sub>3</sub>                                 | 350.4         | 6.01                   | -               |
| 234 | 20           | Phorate                          | Organophosphorus    | Insecticide  | C <sub>7</sub> H <sub>17</sub> O <sub>2</sub> PS <sub>3</sub>                  | 260.4         | 3.92                   | -               |
| 235 | 20           | Phorate sulfone                  | Organophosphorus    | Metabolite   | C <sub>7</sub> H <sub>17</sub> O <sub>4</sub> PS <sub>3</sub>                  | 292.4         | 1.78                   | -               |
| 236 | 20           | Phorate sulfoxide                | Organophosphorus    | Metabolite   | C <sub>7</sub> H <sub>17</sub> O <sub>3</sub> PS <sub>3</sub>                  | 276.4         | 1.51                   | -               |

| No. | 1X<br>(ng/g) | Analyte              | Class                       | Function          | Chemical<br>formula                                                            | MW<br>(g/mol) | Log<br>K <sub>ow</sub> | pK <sub>a</sub> |
|-----|--------------|----------------------|-----------------------------|-------------------|--------------------------------------------------------------------------------|---------------|------------------------|-----------------|
| 237 | 10           | Phosalone            | Organophosphorus            | Insecticide       | C <sub>12</sub> H <sub>15</sub> ClNO <sub>4</sub> PS <sub>2</sub>              | 367.8         | 4.01                   | -               |
| 238 | 100          | Phosmet              | Organophosphorus            | Insecticide       | C <sub>11</sub> H <sub>12</sub> NO <sub>4</sub> PS <sub>2</sub>                | 317.3         | 2.96                   | -               |
| 239 | 10           | Picoxystrobin        | Strobilurin                 | Fungicide         | C <sub>18</sub> H <sub>16</sub> F <sub>3</sub> NO <sub>4</sub>                 | 367.3         | 3.6                    | -               |
| 240 | 100          | Piperonyl butoxide   | Butoxide                    | Synergist         | C <sub>19</sub> H <sub>30</sub> O <sub>5</sub>                                 | 338.4         | 4.75                   | -               |
| 241 | 50           | Pirimicarb           | Carbamate                   | Insecticide       | C <sub>11</sub> H <sub>18</sub> N <sub>4</sub> O <sub>2</sub>                  | 238.3         | 1.7                    | 4.44            |
| 242 | 10           | Pirimiphos           | Organophosphorus            | Insecticide       | C <sub>13</sub> H <sub>24</sub> N <sub>3</sub> O <sub>3</sub> PS               | 333.4         | 5                      | -               |
| 243 | 100          | Pirlimycin           | Lincosamide                 | Antibiotic        | C <sub>17</sub> H <sub>31</sub> ClN <sub>2</sub> O <sub>5</sub> S              | 411           | -                      | -               |
| 244 | 100          | Piroxicam            | NSAID                       | Anti-inflammatory | C <sub>15</sub> H <sub>13</sub> N <sub>3</sub> O <sub>4</sub> S                | 331.3         | 3.06                   | 6.3             |
| 245 | 10           | Primisulfuron-methyl | Sulfonylurea                | Herbicide         | C <sub>15</sub> H <sub>12</sub> F <sub>4</sub> N <sub>4</sub> O <sub>7</sub> S | 468.3         | 0.2                    | 3.47            |
| 246 | 100          | Prochloraz           | Imidazole                   | Fungicide         | C <sub>15</sub> H <sub>16</sub> Cl <sub>3</sub> N <sub>3</sub> O <sub>2</sub>  | 376.7         | 3.53                   | 3.8             |
| 247 | 50           | Profenofos           | Organophosphorus            | Insecticide       | C <sub>11</sub> H <sub>15</sub> BrClO <sub>3</sub> PS                          | 373.6         | 4.44                   | -               |
| 248 | 50           | Prometryn            | Triazine                    | Herbicide         | C <sub>10</sub> H <sub>19</sub> N <sub>5</sub> S                               | 241.4         | 3.1                    | 4.1             |
| 249 | 20           | Propachlor           | Chloroacetamide             | Herbicide         | C <sub>11</sub> H <sub>14</sub> ClNO                                           | 211.7         | 1.4                    | -               |
| 250 | 10           | Propamocarb          | Carbamate                   | Fungicide         | C <sub>9</sub> H <sub>20</sub> N <sub>2</sub> O <sub>2</sub>                   | 188.3         | -1.2                   | 9.6             |
| 251 | 10           | Propanil             | Anilide                     | Herbicide         | C <sub>9</sub> H <sub>9</sub> Cl <sub>2</sub> NO                               | 218.1         | 2.29                   | -               |
| 252 | 50           | Propetamphos         | Organophosphorus            | Insecticide       | C <sub>10</sub> H <sub>20</sub> NO <sub>4</sub> PS                             | 281.3         | 3.82                   | 13.67           |
| 253 | 50           | Propiconazole        | Triazole                    | Fungicide         | C <sub>15</sub> H <sub>17</sub> Cl <sub>2</sub> N <sub>3</sub> O <sub>2</sub>  | 342.2         | 3.72                   | 1.09            |
| 254 | 50           | Propoxur             | Carbamate                   | Insecticide       | C <sub>11</sub> H <sub>15</sub> NO <sub>3</sub>                                | 209.2         | 1.56                   | -               |
| 255 | 50           | Propoxycarbazone     | Triazolone                  | Herbicide         | C <sub>15</sub> H <sub>18</sub> N <sub>4</sub> O <sub>7</sub> S                | 398.4         | -                      | -               |
| 256 | 20           | Prosulfuron          | Sulfonylurea                | Herbicide         | C <sub>15</sub> H <sub>16</sub> F <sub>3</sub> N <sub>5</sub> O <sub>4</sub> S | 419.4         | 1.5                    | 3.76            |
| 257 | 50           | Pyraclofos           | Organophosphorus            | Insecticide       | C <sub>14</sub> H <sub>18</sub> ClN <sub>2</sub> O <sub>3</sub> PS             | 360.8         | 3.77                   | -               |
| 258 | 50           | Pyraclostrobin       | Strobilurin                 | Fungicide         | C <sub>19</sub> H <sub>18</sub> ClN <sub>3</sub> O <sub>4</sub>                | 387.8         | 3.99                   | -               |
| 259 | 10           | Pyrazophos           | Phosphorothiolate           | Fungicide         | C <sub>14</sub> H <sub>20</sub> N <sub>3</sub> O <sub>5</sub> PS               | 373.4         | 3.8                    | -               |
| 260 | 20           | Pyridaben            | Pyridazinone                | Insecticide       | C <sub>19</sub> H <sub>25</sub> ClN <sub>2</sub> OS                            | 364.9         | 6.37                   | -               |
| 261 | 20           | Pyrifenox            | Pyridine                    | Fungicide         | C <sub>14</sub> H <sub>12</sub> Cl <sub>2</sub> N <sub>2</sub> O               | 295.2         | 3.7                    | 4.61            |
| 262 | 100          | Pyrimethanil         | Anilinopyrimidine           | Fungicide         | C <sub>12</sub> H <sub>13</sub> N <sub>3</sub>                                 | 199.3         | 3                      | 3.52            |
| 263 | 50           | Pyriproxyfen         | Pyridine                    | Insecticide       | C <sub>20</sub> H <sub>19</sub> NO <sub>3</sub>                                | 321.4         | 5.37                   | 6.87            |
| 264 | 10           | Quinclorac           | Quinolinecarboxylic<br>acid | Herbicide         | C <sub>10</sub> H <sub>5</sub> Cl <sub>2</sub> NO <sub>2</sub>                 | 242.1         | -1.15                  | 4.34            |

| No.     | 1X<br>(ng/g) | Analyte                | Class               | Function        | Chemical<br>formula                                                                                    | MW<br>(g/mol)  | Log<br>K <sub>ow</sub> | pK <sub>a</sub> |
|---------|--------------|------------------------|---------------------|-----------------|--------------------------------------------------------------------------------------------------------|----------------|------------------------|-----------------|
| 265     | 10           | Quintozene             | Organochlorine      | Fungicide       | C <sub>6</sub> Cl <sub>5</sub> NO <sub>2</sub>                                                         | 295.3          | 5.1                    | -               |
| 266     | 50           | Quizalofop             | Aryloxyphenoxy acid | Herbicide       | C <sub>19</sub> H <sub>17</sub> ClN <sub>2</sub> O <sub>4</sub>                                        | 372.8          | 4.28                   |                 |
| 267     | 10           | Ractopamine            | β-Agonist           | Growth promoter | C <sub>18</sub> H <sub>23</sub> NO <sub>3</sub>                                                        | 301.4          | 2.4                    | 9.4             |
| 268     | 10           | Ritodrine              | β-Agonist           | Tocolytic       | C <sub>17</sub> H <sub>21</sub> NO <sub>3</sub>                                                        | 287.4          | 2.4                    | -               |
| 269     | 10           | Ronidazole             | Nitroimidazole      | Antibiotic      | C <sub>6</sub> H <sub>8</sub> N <sub>4</sub> O <sub>4</sub>                                            | 200.2          | -0.38                  | -               |
| 270     | 10           | Saflufenacil           | Uracil              | Herbicide       | C <sub>17</sub> H <sub>17</sub> ClF <sub>4</sub> N <sub>4</sub> O <sub>5</sub> S                       | 500.9          | 2.6                    | 4.41            |
| 271     | 200          | Sethoxydim             | Cyclohexadione      | Herbicide       | C <sub>17</sub> H <sub>29</sub> NO <sub>3</sub> S                                                      | 327.5          | 4.51                   | 4.4             |
| 272     | 10           | Simazine               | Triazine            | Herbicide       | C <sub>7</sub> H <sub>12</sub> ClN <sub>5</sub>                                                        | 201.7          | 2.1                    | 1.62            |
| 273     | 10           | Spinetoram             | Spinosyn            | Insecticide     | C <sub>42</sub> H <sub>69</sub> NO <sub>10</sub> +<br>C <sub>43</sub> H <sub>69</sub> NO <sub>10</sub> | -              | -                      | -               |
| 274/275 | 200          | Spinosyns A&D          | Spinosyn            | Insecticide     | C <sub>41</sub> H <sub>65</sub> NO <sub>10</sub> /<br>C <sub>42</sub> H <sub>67</sub> NO <sub>10</sub> | 732 /<br>746.0 | 2.78 /<br>3.23         | 8.1/<br>7.87    |
| 276     | 10           | Spirodiclofen          | Tetronic acid       | Insecticide     | C <sub>21</sub> H <sub>24</sub> Cl <sub>2</sub> O <sub>4</sub>                                         | 411.3          | 5.83                   | -               |
| 277     | 10           | Spiromesifen           | Tetronic acid       | Insecticide     | C <sub>23</sub> H <sub>30</sub> O <sub>4</sub>                                                         | 370.5          | 4.55                   | -               |
| 278     | 100          | Sulfabromomethazine    | Sulfonamide         | Antibiotic      | C <sub>12</sub> H <sub>13</sub> BrN <sub>4</sub> O <sub>2</sub> S                                      | 357.2          | 0.14                   | 7.59            |
| 279     | 100          | Sulfachloropyridazine  | Sulfonamide         | Antibiotic      | C <sub>10</sub> H <sub>9</sub> ClN <sub>4</sub> O <sub>2</sub> S                                       | 284.7          | -                      | -               |
| 280     | 100          | Sulfaclozine           | Sulfonamide         | Antibiotic      | C <sub>10</sub> H <sub>9</sub> ClN <sub>4</sub> O <sub>2</sub> S                                       | 284.7          | -                      | -               |
| 281     | 100          | Sulfadiazine           | Sulfonamide         | Antibiotic      | C <sub>10</sub> H <sub>10</sub> N <sub>4</sub> O <sub>2</sub> S                                        | 250.3          | -0.09                  | 6.36            |
| 282     | 100          | Sulfadimethoxine       | Sulfonamide         | Antibiotic      | C <sub>12</sub> H <sub>14</sub> N <sub>4</sub> O <sub>4</sub> S                                        | 310.3          | 1.63                   | -               |
| 283     | 100          | Sulfadoxine            | Sulfonamide         | Antibiotic      | C <sub>12</sub> H <sub>14</sub> N <sub>4</sub> O <sub>4</sub> S                                        | 310.3          | 0.7                    | -               |
| 284     | 100          | Sulfaethoxypyridazine  | Sulfonamide         | Antibiotic      | C <sub>12</sub> H <sub>14</sub> N <sub>4</sub> O <sub>3</sub> S                                        | 294.3          | -                      | -               |
| 285     | 100          | Sulfamerazine          | Sulfonamide         | Antibiotic      | C <sub>11</sub> H <sub>12</sub> N <sub>4</sub> O <sub>2</sub> S                                        | 264.3          | 0.14                   | -               |
| 286     | 100          | Sulfamethazine         | Sulfonamide         | Antibiotic      | C <sub>12</sub> H <sub>14</sub> N <sub>4</sub> O <sub>2</sub> S                                        | 278.3          | 0.89                   | 7.59            |
| 287     | 100          | Sulfamethizole         | Sulfonamide         | Antibiotic      | C <sub>9</sub> H <sub>10</sub> N <sub>4</sub> O <sub>2</sub> S <sub>2</sub>                            | 270.3          | 0.54                   | 2.1             |
| 288     | 100          | Sulfamethoxazole       | Sulfonamide         | Antibiotic      | C <sub>10</sub> H <sub>11</sub> N <sub>3</sub> O <sub>3</sub> S                                        | 253.3          | 0.89                   | -               |
| 289     | 100          | Sulfamethoxypyridazine | Sulfonamide         | Antibiotic      | C <sub>11</sub> H <sub>12</sub> N <sub>4</sub> O <sub>3</sub> S                                        | 280.3          |                        |                 |
| 290     | 100          | Sulfamonomethoxine     | Sulfonamide         | Antibiotic      | C <sub>11</sub> H <sub>12</sub> N <sub>4</sub> O <sub>3</sub> S                                        | 280.3          | -                      | -               |
| 291     | 100          | Sulfanilamide          | Sulfonamide         | Antibiotic      | C <sub>6</sub> H <sub>8</sub> N <sub>2</sub> O <sub>2</sub> S                                          | 172.2          | -0.62                  | 10.6            |
| 292     | 100          | Sulfaquinoxaline       | Sulfonamide         | Antibiotic      | C <sub>14</sub> H <sub>12</sub> N <sub>4</sub> O <sub>2</sub> S                                        | 300.3          | 1.68                   | -               |

| No. | 1X<br>(ng/g) | Analyte               | Class            | Function                   | Chemical<br>formula                                                                           | MW<br>(g/mol) | Log<br>K <sub>ow</sub> | pK <sub>a</sub> |
|-----|--------------|-----------------------|------------------|----------------------------|-----------------------------------------------------------------------------------------------|---------------|------------------------|-----------------|
| 293 | 100          | Sulfathiazole         | Sulfonamide      | Antibiotic                 | C <sub>9</sub> H <sub>9</sub> N <sub>3</sub> O <sub>2</sub> S <sub>2</sub>                    | 255.3         | 0.05                   | 7.2             |
| 294 | 100          | Sulfisoxazole         | Sulfonamide      | Antibiotic                 | C <sub>11</sub> H <sub>13</sub> N <sub>3</sub> O <sub>3</sub> S                               | 267.3         | 1.01                   | 5               |
| 295 | 300          | Sulfoxaflor           | Sulfoximine      | Insecticide                | C <sub>10</sub> H <sub>10</sub> F <sub>3</sub> N <sub>3</sub> OS                              | 277.3         | 0.8                    | -               |
| 296 | 50           | Sulprofos             | Organophosphorus | Insecticide                | C <sub>12</sub> H <sub>19</sub> O <sub>2</sub> PS <sub>3</sub>                                | 322.4         | 5.48                   | -               |
| 297 | 100          | Tebuconazole          | Triazole         | Fungicide                  | C <sub>16</sub> H <sub>22</sub> ClN <sub>3</sub> O                                            | 307.8         | 3.7                    | -               |
| 298 | 10           | Tebuthiuron           | Urea             | Herbicide                  | C <sub>9</sub> H <sub>16</sub> N <sub>4</sub> OS                                              | 228.3         | 1.79                   | -               |
| 299 | 50           | Tefluthrin            | Pyrethroid       | Insecticide                | C <sub>17</sub> H <sub>14</sub> ClF <sub>7</sub> O <sub>2</sub>                               | 418.7         | 6.4                    | -               |
| 300 | 10           | Terbufos              | Organophosphorus | Insecticide                | C <sub>9</sub> H <sub>21</sub> O <sub>2</sub> PS <sub>3</sub>                                 | 288.4         | 2.77                   | -               |
| 301 | 50           | Tetrachlorvinphos     | Organophosphorus | Insecticide                | C <sub>10</sub> H <sub>9</sub> Cl <sub>4</sub> O <sub>4</sub> P                               | 366           | 3.86                   | -               |
| 302 | 500          | Tetraconazole         | Triazole         | Fungicide                  | C <sub>13</sub> H <sub>11</sub> Cl <sub>2</sub> F <sub>4</sub> N <sub>3</sub> O               | 372.1         | 3.56                   | 0.8             |
| 303 | 100          | Tetracycline          | Tetracycline     | Antibiotic                 | C <sub>22</sub> H <sub>24</sub> N <sub>2</sub> O <sub>8</sub>                                 | 444.4         | -1.3                   | 3.3             |
| 304 | 90           | Captan                | Phthalimide      | Fungicide                  | C <sub>9</sub> H <sub>8</sub> Cl <sub>3</sub> NO <sub>2</sub> S                               | 300.6         | 2.8                    | -               |
| 305 | 50           | Tetramethrin          | Pyrethroid       | Insecticide                | C <sub>19</sub> H <sub>25</sub> NO <sub>4</sub>                                               | 331.4         | 4.6                    | -               |
| 306 | 50           | Thiabendazole         | Benzimidazole    | Fungicide/<br>Anthelmintic | C <sub>10</sub> H <sub>7</sub> N <sub>3</sub> S                                               | 201.3         | 2.47                   | 4.64            |
| 307 | 100          | Thiacloprid           | Neonicotinoid    | Insecticide                | C <sub>10</sub> H <sub>9</sub> ClN <sub>4</sub> S                                             | 252.7         | 1.26                   | -               |
| 308 | 20           | Thiamethoxam          | Neonicotinoid    | Insecticide                | C <sub>8</sub> H <sub>10</sub> ClN <sub>5</sub> O <sub>3</sub> S                              | 291.7         | -0.13                  | -               |
| 309 | 50           | Thiamphenicol         | Phenicol         | Antibiotic                 | C <sub>12</sub> H <sub>15</sub> Cl <sub>2</sub> NO <sub>5</sub> S                             | 356.2         | -0.27                  | -               |
| 310 | 10           | Thidiazuron           | Phenylurea       | Herbicide                  | C <sub>9</sub> H <sub>8</sub> N <sub>4</sub> OS                                               | 220.2         | 1.77                   | -               |
| 311 | 10           | Thiencarbazone-methyl | Triazolone       | Herbicide                  | C <sub>12</sub> H <sub>14</sub> N <sub>4</sub> O <sub>7</sub> S <sub>2</sub>                  | 390.4         | -1.98                  | 3               |
| 312 | 10           | Thiobencarb           | Thiocarbamate    | Herbicide                  | C <sub>12</sub> H <sub>16</sub> ClNOS                                                         | 257.8         | 3.42                   | -               |
| 313 | 50           | Thiophanate-methyl    | Benzimidazole    | Fungicide                  | C <sub>12</sub> H <sub>14</sub> N <sub>4</sub> O <sub>4</sub> S <sub>2</sub>                  | 342.4         | 1.45                   | -               |
| 314 | 100          | Tiamulin              | Diterpene        | Antibiotic                 | C <sub>32</sub> H <sub>51</sub> NO <sub>8</sub> S                                             | 609.8         | -                      | -               |
| 315 | 50           | Tilmicosin            | Macrolide        | Antibiotic                 | C <sub>46</sub> H <sub>80</sub> N <sub>2</sub> O <sub>13</sub>                                | 869.1         | 3.8                    | 8.18            |
| 316 | 10           | Tolyfluanid           | Sulphamide       | Fungicide                  | C <sub>10</sub> H <sub>13</sub> Cl <sub>2</sub> FN <sub>2</sub> O <sub>2</sub> S <sub>2</sub> | 347.3         | 3.9                    | -               |
| 317 | 10           | Triadimefon           | Triazole         | Fungicide                  | C <sub>14</sub> H <sub>16</sub> ClN <sub>3</sub> O <sub>2</sub>                               | 293.8         | 3.11                   | -               |
| 318 | 10           | Triadimenol           | Triazole         | Fungicide                  | C <sub>14</sub> H <sub>18</sub> ClN <sub>3</sub> O <sub>2</sub>                               | 295.8         | -                      | -               |
| 319 | 10           | Triazophos            | Organophosphorus | Insecticide                | C <sub>12</sub> H <sub>16</sub> N <sub>3</sub> O <sub>3</sub> PS                              | 313.3         | 3.34                   | -               |
| 320 | 10           | Tribufos              | Organophosphorus | Defoliant                  | C <sub>12</sub> H <sub>27</sub> OPS <sub>3</sub>                                              | 314.5         | -                      | -               |

| No. | 1X<br>(ng/g) | Analyte                   | Class          | Function    | Chemical<br>formula                                                            | MW<br>(g/mol) | Log<br>K <sub>ow</sub> | pK <sub>a</sub> |
|-----|--------------|---------------------------|----------------|-------------|--------------------------------------------------------------------------------|---------------|------------------------|-----------------|
| 321 | 225          | Triclabendazole           | Benzimidazole  | Flukicide   | C <sub>14</sub> H <sub>9</sub> Cl <sub>3</sub> N <sub>2</sub> OS               | 359.7         | 3.48                   | -               |
| 322 | 225          | Triclabendazole sulfoxide | Benzimidazole  | Metabolite  | C <sub>14</sub> H <sub>9</sub> Cl <sub>3</sub> N <sub>2</sub> O <sub>2</sub> S | 375.7         | -                      | -               |
| 323 | 50           | Tridiphane                | Oxirane        | Herbicide   | C <sub>10</sub> H <sub>7</sub> Cl <sub>5</sub> O                               | 320.4         | 4.34                   | -               |
| 324 | 40           | Trifloxystrobin           | Strobilurin    | Fungicide   | C <sub>20</sub> H <sub>19</sub> F <sub>3</sub> N <sub>2</sub> O <sub>4</sub>   | 408.4         | 4.5                    | -               |
| 325 | 50           | Triflumizole              | Imidazole      | Fungicide   | C <sub>15</sub> H <sub>15</sub> ClF <sub>3</sub> N <sub>3</sub> O              | 345.7         | 4.77                   | 3.7             |
| 326 | 10           | Triflumuron               | Benzoylurea    | Insecticide | C <sub>15</sub> H <sub>10</sub> ClF <sub>3</sub> N <sub>2</sub> O <sub>3</sub> | 358.7         | 4.9                    | -               |
| 327 | 10           | Trifluralin               | Dinitroaniline | Herbicide   | C <sub>13</sub> H <sub>16</sub> F <sub>3</sub> N <sub>3</sub> O <sub>4</sub>   | 335.3         | 5.27                   | -               |
| 328 | 50           | Trimethoprim              | Pyrimidine     | Antibiotic  | C <sub>14</sub> H <sub>18</sub> N <sub>4</sub> O <sub>3</sub>                  | 290.3         | 0.91                   | 7.12            |
| 329 | 100          | Tylosin                   | Macrolide      | Antibiotic  | C <sub>46</sub> H <sub>77</sub> NO <sub>17</sub>                               | 916.1         | 1.63                   | 7.73            |
| 330 | 10           | Vinclozolin               | Dicarboximide  | Fungicide   | C <sub>12</sub> H <sub>9</sub> Cl <sub>2</sub> NO <sub>3</sub>                 | 286.1         | 3                      | -               |

**Table S2.** LPGC-MS/MS conditions;  $t_R$  = retention time, MRM = multiple reaction monitoring transition, CE = collision energy, ISTD = internal standard, QC = quality control.

| No. | Analyte           | $t_R$<br>(min) | MRM I<br>( $m/z$ ) | CE<br>(V) | MRM II<br>( $m/z$ ) | CE<br>(V) | MRM III<br>( $m/z$ ) | CE<br>(V) |
|-----|-------------------|----------------|--------------------|-----------|---------------------|-----------|----------------------|-----------|
| 1   | Acephate          | 3.1            | 136 → 94           | 10        | 136 → 42            | 10        |                      |           |
| 2   | Alachlor          | 4.3            | 188 → 160          | 10        | 188 → 130           | 40        | 188 → 118            | 25        |
| 3   | Aldrin            | 4.5            | 263 → 228          | 20        | 263 → 193           | 40        | 263 → 191            | 40        |
| 4   | Atrazine          | 3.9            | 215 → 58           | 10        | 200 → 94            | 25        | 200 → 68             | 25        |
| 5   | Atrazine-desethyl | 3.7            | 187 → 172          | 5         | 187 → 145           | 20        | 187 → 58             | 5         |
| 6   | Azinphos-ethyl    | 5.5            | 160 → 132          | 5         | 160 → 77            | 20        | 160 → 51             | 40        |
| 7   | Azinphos-methyl   | 5.4            | 160 → 132          | 5         | 160 → 77            | 20        | 160 → 51             | 40        |
| 8   | Benoxacor         | 4.2            | 259 → 176          | 5         | 259 → 134           | 30        | 259 → 120            | 20        |
| 9   | Bifenazate        | 3.8            | 258 → 196          | 5         | 258 → 182           | 20        | 258 → 170            | 20        |
| 10  | Bifenthrin        | 4.0            | 181 → 166          | 15        | 181 → 165           | 30        | 181 → 141            | 25        |
| 11  | Bitertanol        | 4.1            | 170 → 141          | 35        | 170 → 115           | 40        | 170 → 55             | 10        |

| No.   | Analyte                               | $t_R$<br>(min) | MRM I<br>( $m/z$ ) | CE<br>(V) | MRM II<br>( $m/z$ ) | CE<br>(V) | MRM III<br>( $m/z$ ) | CE<br>(V) |
|-------|---------------------------------------|----------------|--------------------|-----------|---------------------|-----------|----------------------|-----------|
| 12    | Boscalid                              | 4.0            | 140 → 112          | 10        | 140 → 85            | 35        | 140 → 76             | 30        |
| 13    | Bromopropylate                        | 5.3            | 341 → 185          | 25        | 341 → 183           | 25        | 341 → 157            | 40        |
| 14    | Buprofezin                            | 5.3            | 172 → 115          | 5         | 172 → 83            | 10        | 172 → 57             | 5         |
| 15    | Carbaryl                              | 5.7            | 144 → 116          | 15        | 144 → 115           | 25        | 144 → 89             | 40        |
| 16    | Carbofuran                            | 6.1            | 164 → 149          | 5         | 164 → 103           | 25        | 164 → 77             | 40        |
| 17    | Carbophenothion                       | 5.4            | 199 → 143          | 10        | 342 → 199           | 5         | 342 → 157            | 5         |
| 18    | <i>cis</i> -Chlordane                 | 4.9            | 373 → 301          | 10        | 373 → 266           | 30        | 373 → 264            | 30        |
| 19    | <i>trans</i> -Chlordane               | 3.2            | 373 → 301          | 10        | 373 → 266           | 30        | 373 → 264            | 30        |
| 20    | Chlorfenvinphos                       | 4.3            | 267 → 159          | 20        | 267 → 123           | 40        | 267 → 81             | 20        |
| 21    | Chlorpropham                          | 3.9            | 213 → 171          | 5         | 213 → 154           | 5         | 213 → 127            | 15        |
| 22    | Chlorpyrifos                          | 5.1            | 199 → 171          | 20        | 199 → 109           | 40        | 197 → 169            | 15        |
| 23    | Chlorpyrifos-methyl                   | 4.8            | 286 → 271          | 15        | 286 → 241           | 25        | 286 → 93             | 25        |
| 24    | Coumaphos                             | 4.8            | 362 → 109          | 15        | 362 → 81            | 40        | 226 → 91             | 40        |
| 25    | Cyfluthrin                            | 4.6            | 163 → 91           | 15        | 163 → 127           | 5         |                      |           |
| 26    | $\lambda$ -Cyhalothrin                | 3.7            | 197 → 141          | 10        | 197 → 91            | 30        | 181 → 152            | 30        |
| 27    | Cyphenothrin                          | 4.4            | 123 → 81           | 10        | 123 → 79            | 25        | 123 → 95             | 15        |
| 28    | Cypermethrin                          | 4.3            | 181 → 152          | 20        | 163 → 127           | 5         | 163 → 91             | 15        |
| 29    | Cyproconazole                         | 5.8            | 222 → 125          | 20        | 222 → 82            | 5         | 222 → 55             | 20        |
| 30    | <i>o,p'</i> -DDD                      | 5.9            | 235 → 165          | 35        | 237 → 165           | 25        | 235 → 199            | 15        |
| 31,32 | <i>p,p'</i> -DDD + <i>o,p'</i> -DDT   | 5.5            | 235 → 165          | 35        | 237 → 165           | 25        | 235 → 199            | 15        |
| 33    | <i>o,p'</i> -DDE                      | 6.0            | 318 → 248          | 25        | 318 → 246           | 15        | 246 → 176            | 25        |
| 34    | <i>p,p'</i> -DDE                      | 5.4            | 246 → 176          | 35        | 318 → 246           | 25        | 318 → 248            | 25        |
| 35    | <i>p,p'</i> -DDT                      | 5.0            | 237 → 165          | 25        | 235 → 199           | 15        | 235 → 165            | 35        |
| 36    | Deltamethrin                          | 4.9            | 181 → 152          | 25        | 181 → 127           | 25        | 181 → 77             | 40        |
| 37    | Desmedipham                           | 5.1            | 181 → 122          | 15        | 181 → 109           | 10        | 181 → 81             | 25        |
| 38    | Diazinon                              | 4.7            | 304 → 179          | 15        | 199 → 93            | 15        | 179 → 137            | 20        |
| 39    | Dichlormid                            | 4.9            | 172 → 144          | 5         | 172 → 108           | 5         | 172 → 96             | 10        |
| 40    | Dichlorvos                            | 5.2            | 220 → 185          | 5         | 220 → 109           | 20        | 185 → 93             | 10        |
| 41    | Dicofol (as 4,4-dichlorobenzophenone) | 6.6            | 139 → 111          | 15        | 139 → 76            | 30        |                      |           |

| No.   | Analyte             | $t_R$<br>(min) | MRM I<br>(m/z) | CE<br>(V) | MRM II<br>(m/z) | CE<br>(V) | MRM III<br>(m/z) | CE<br>(V) |
|-------|---------------------|----------------|----------------|-----------|-----------------|-----------|------------------|-----------|
| 42    | Dicrotophos         | 3.8            | 127 → 109      | 10        | 127 → 95        | 15        | 127 → 79         | 18        |
| 43    | Dieldrin            | 4.0            | 263 → 193      | 40        | 263 → 191       | 40        | 263 → 228        | 20        |
| 44    | Difenoconazole      | 2.9            | 323 → 265      | 10        | 323 → 202       | 40        | 265 → 202        | 20        |
| 45    | Dimethoate          | 2.5            | 125 → 93       | 15        | 125 → 79        | 5         | 93 → 63          | 5         |
| 46    | Dimethomorph        | 4.5            | 387 → 301      | 15        | 387 → 165       | 30        | 387 → 139        | 35        |
| 47    | Dimoxystrobin       | 3.7            | 205 → 116      | 10        | 205 → 89        | 40        | 205 → 58         | 20        |
| 48    | Disulfoton          | 4.9            | 153 → 97       | 10        | 142 → 81        | 10        | 88 → 60          | 5         |
| 49    | DMPF (amitraz met.) | 6.5            | 149 → 121      | 5         | 149 → 106       | 25        | 149 → 77         | 40        |
| 50    | Endosulfan I        | 3.9            | 241 → 206      | 15        | 241 → 172       | 30        | 241 → 170        | 25        |
| 51    | Endosulfan II       | 6.9            | 241 → 206      | 15        | 241 → 172       | 30        | 241 → 170        | 25        |
| 52    | Endosulfan sulfate  | 5.3            | 387 → 253      | 15        | 272 → 237       | 15        | 272 → 235        | 15        |
| 53    | Endrin              | 4.1            | 263 → 193      | 40        | 263 → 191       | 40        | 263 → 228        | 20        |
| 54    | Endrin ketone       | 3.2            | 317 → 245      | 15        | 317 → 101       | 15        | 317 → 65         | 40        |
| 55,56 | Es+Fenvalerate      | 4.8            | 167 → 125      | 5         | 167 → 89        | 35        | 167 → 77         | 30        |
| 57    | Ethalfuralin        | 5.0            | 316 → 202      | 25        | 276 → 202       | 15        | 276 → 105        | 25        |
| 58    | Ethion              | 5.2            | 231 → 175      | 20        | 231 → 129       | 20        | 231 → 65         | 40        |
| 59    | Ethofumesate        | 5.0            | 286 → 207      | 10        | 286 → 179       | 15        | 286 → 161        | 20        |
| 60    | Ethoprop            | 5.4            | 242 → 158      | 5         | 242 → 97        | 35        | 242 → 65         | 40        |
| 61    | Etofenprox          | 6.4            | 163 → 135      | 15        | 163 → 107       | 20        | 163 → 95         | 20        |
| 62    | Etrimfos            | 3.7            | 292 → 181      | 5         | 292 → 153       | 20        | 292 → 125        | 20        |
| 63    | Famphur             | 5.0            | 282 → 218      | 5         | 218 → 186       | 10        | 282 → 109        | 40        |
| 64    | Fenamiphos          | 4.4            | 303 → 195      | 5         | 303 → 154       | 20        | 303 → 80         | 35        |
| 65    | Fenarimol           | 3.6            | 139 → 111      | 15        | 139 → 75        | 30        |                  |           |
| 66    | Fenitrothion        | 6.1            | 277 → 125      | 15        | 277 → 109       | 20        | 277 → 79         | 35        |
| 67    | Fenoxycarb          | 3.7            | 255 → 186      | 15        | 255 → 158       | 20        | 301 → 161        | 10        |
| 68    | Fenpropathrin       | 5.1            | 181 → 152      | 20        | 181 → 127       | 30        | 181 → 77         | 40        |
| 69    | Fenthion            | 4.8            | 278 → 169      | 15        | 278 → 109       | 15        | 278 → 79         | 35        |
| 70    | Fenthion sulfone    | 5.7            | 310 → 137      | 25        | 310 → 121       | 25        | 310 → 105        | 25        |
| 71    | Fipronil            | 4.4            | 367 → 255      | 20        | 367 → 213       | 35        | 367 → 178        | 40        |

| No. | Analyte                 | $t_R$<br>(min) | MRM I<br>(m/z) | CE<br>(V) | MRM II<br>(m/z) | CE<br>(V) | MRM III<br>(m/z) | CE<br>(V) |
|-----|-------------------------|----------------|----------------|-----------|-----------------|-----------|------------------|-----------|
| 72  | Fipronyl desulfinyl     | 5.5            | 388 → 333      | 20        | 333 → 281       | 20        | 333 → 231        | 20        |
| 73  | Fipronil sulfide        | 5.3            | 351 → 255      | 20        | 351 → 228       | 40        | 351 → 192        | 35        |
| 74  | Fludioxonil             | 4.4            | 248 → 182      | 20        | 248 → 154       | 15        | 248 → 127        | 20        |
| 75  | Flufenacet              | 5.0            | 363 → 151      | 15        | 363 → 211       | 10        |                  |           |
| 76  | Flufenoxuron            | 4.6            | 331 → 276      | 25        | 331 → 268       | 25        | 331 → 227        | 25        |
| 77  | Fluopyram               | 4.6            | 223 → 196      | 20        | 223 → 187       | 20        | 223 → 160        | 35        |
| 78  | Fluoxastrobin           | 4.2            | 363 → 305      | 15        | 363 → 230       | 20        | 363 → 150        | 35        |
| 79  | Fluroxypyr-meptyl       | 4.8            | 254 → 181      | 15        | 210 → 181       | 15        | 181 → 161        | 15        |
| 80  | Flusilazole             | 4.4            | 233 → 165      | 25        | 233 → 152       | 25        | 233 → 91         | 25        |
| 81  | Flutriafol              | 4.0            | 219 → 123      | 20        | 219 → 95        | 40        |                  |           |
| 82  | Heptachlor              | 4.6            | 272 → 237      | 20        | 272 → 235       | 20        | 272 → 117        | 35        |
| 83  | Heptachlor epoxide      | 6.0            | 353 → 282      | 20        | 353 → 263       | 15        | 353 → 253        | 25        |
| 84  | Hexachlorobenzene       | 5.5            | 284 → 249      | 20        | 284 → 214       | 35        | 284 → 179        | 40        |
| 85  | Hexaconazole            | 4.9            | 214 → 187      | 15        | 214 → 159       | 25        | 214 → 145        | 35        |
| 86  | $\alpha$ -HCH           | 4.8            | 219 → 183      | 15        | 183 → 147       | 30        | 181 → 109        | 30        |
| 87  | $\beta$ -HCH            | 4.3            | 219 → 183      | 15        | 183 → 147       | 30        | 181 → 109        | 30        |
| 88  | $\gamma$ -HCH (Lindane) | 4.7            | 219 → 183      | 15        | 183 → 147       | 30        | 181 → 109        | 30        |
| 89  | $\delta$ -HCH           | 3.9            | 219 → 183      | 15        | 183 → 147       | 30        | 181 → 109        | 30        |
| 90  | Imazalil                | 4.8            | 173 → 109      | 30        | 215 → 145       | 10        | 215 → 173        | 10        |
| 91  | Iprodione               | 4.8            | 245 → 188      | 10        | 187 → 159       | 15        | 187 → 124        | 25        |
| 92  | Isocarbofos             | 5.2            | 289 → 136      | 15        | 289 → 113       | 5         | 289 → 108        | 40        |
| 93  | Kresoxim-methyl         | 4.5            | 206 → 131      | 20        | 206 → 116       | 5         | 116 → 89         | 20        |
| 94  | Malathion               | 4.9            | 173 → 117      | 10        | 173 → 99        | 15        | 125 → 79         | 10        |
| 95  | Malathion oxon          | 4.2            | 268 → 127      | 10        | 268 → 109       | 35        | 268 → 99         | 15        |
| 96  | Mephosfolan             | 4.4            | 227 → 168      | 5         | 227 → 135       | 15        | 227 → 60         | 40        |
| 97  | Metalaxyl               | 4.6            | 206 → 132      | 20        | 206 → 117       | 35        | 206 → 105        | 20        |
| 98  | Metazochlor             | 4.3            | 209 → 132      | 20        | 209 → 117       | 40        | 209 → 105        | 40        |
| 99  | Metconazole             | 4.6            | 250 → 125      | 15        | 319 → 70        | 25        |                  |           |
| 100 | Methamidophos           | 5.5            | 141 → 95       | 5         | 141 → 79        | 20        | 95 → 79          | 10        |



| No.     | Analyte              | t <sub>R</sub><br>(min) | MRM I<br>(m/z) | CE<br>(V) | MRM II<br>(m/z) | CE<br>(V) | MRM III<br>(m/z) | CE<br>(V) |
|---------|----------------------|-------------------------|----------------|-----------|-----------------|-----------|------------------|-----------|
| 101     | Methidathion         | 2.5                     | 145 → 85       | 15        | 145 → 58        | 15        |                  |           |
| 102     | Methiocarb sulfone   | 4.7                     | 200 → 137      | 5         | 200 → 121       | 20        | 200 → 91         | 35        |
| 103     | Methiocarb sulfoxide | 4.3                     | 184 → 169      | 5         | 184 → 107       | 15        | 184 → 79         | 30        |
| 104     | Metribuzin           | 4.3                     | 198 → 89       | 30        | 198 → 82        | 20        | 198 → 55         | 15        |
| 105     | Mirex                | 4.2                     | 272 → 237      | 15        | 272 → 143       | 40        | 272 → 117        | 40        |
| 106     | Monocrotophos        | 5.7                     | 192 → 127      | 10        | 192 → 109       | 30        | 192 → 66         | 35        |
| 107     | Myclobutanil         | 3.7                     | 179 → 125      | 15        | 179 → 115       | 30        | 179 → 90         | 35        |
| 108     | Nitenpyram           | 4.9                     | 236 → 207      | 10        | 236 → 169       | 5         | 236 → 67         | 35        |
| 109     | Omethoate            | 4.1                     | 156 → 110      | 5         | 110 → 79        | 15        | 156 → 79         | 25        |
| 110     | Oxadiazon            | 3.5                     | 344 → 258      | 10        | 344 → 175       | 25        | 344 → 112        | 40        |
| 111     | Oxychlorane          | 4.8                     | 387 → 263      | 15        | 387 → 253       | 15        |                  |           |
| 112     | Oxyfluorfen          | 4.7                     | 252 → 170      | 40        | 252 → 146       | 40        |                  |           |
| 113     | Paclobutrazol        | 4.8                     | 236 → 167      | 10        | 236 → 132       | 20        | 236 → 125        | 10        |
| 114     | Parathion            | 4.7                     | 291 → 109      | 20        | 291 → 91        | 20        | 291 → 81         | 40        |
| 115     | Parathion-methyl     | 4.5                     | 263 → 125      | 15        | 263 → 109       | 10        | 263 → 79         | 15        |
| 116     | PCB 28               | 4.3                     | 256 → 221      | 15        | 256 → 186       | 30        | 256 → 151        | 40        |
| 117     | PCB 52               | 4.7                     | 290 → 255      | 15        | 290 → 220       | 20        | 290 → 185        | 40        |
| 118,119 | PCB 77+81            | 5.1                     | 292 → 222      | 35        | 292 → 220       | 35        | 292 → 185        | 40        |
| 120     | PCB 101              | 5.0                     | 326 → 290      | 25        | 326 → 256       | 30        | 326 → 254        | 30        |
| 121     | PCB 105              | 5.2                     | 326 → 290      | 25        | 326 → 256       | 30        | 326 → 254        | 30        |
| 122,123 | PCB 123+118          | 5.2                     | 326 → 290      | 25        | 326 → 256       | 30        | 326 → 254        | 30        |
| 124     | PCB 126              | 5.1                     | 326 → 290      | 25        | 326 → 256       | 30        | 326 → 254        | 30        |
| 125     | PCB 138              | 5.4                     | 360 → 290      | 25        | 360 → 288       | 40        | 360 → 218        | 40        |
| 126     | PCB 153              | 5.6                     | 360 → 290      | 25        | 360 → 288       | 40        | 360 → 218        | 40        |
| 127,128 | PCB 156+157          | 5.6                     | 360 → 290      | 25        | 360 → 288       | 40        | 360 → 218        | 40        |
| 129     | PCB 169              | 5.7                     | 360 → 290      | 25        | 360 → 288       | 40        | 360 → 218        | 40        |
| 130     | PCB 180              | 4.2                     | 394 → 359      | 15        | 394 → 324       | 40        | 394 → 322        | 40        |
| 131     | PCB 189              | 4.5                     | 394 → 359      | 20        | 394 → 324       | 40        | 394 → 322        | 20        |
| 132     | Penconazole          | 4.9                     | 248 → 206      | 15        | 248 → 192       | 15        | 248 → 157        | 30        |

| No. | Analyte            | t <sub>R</sub><br>(min) | MRM I<br>(m/z) | CE<br>(V) | MRM II<br>(m/z) | CE<br>(V) | MRM III<br>(m/z) | CE<br>(V) |
|-----|--------------------|-------------------------|----------------|-----------|-----------------|-----------|------------------|-----------|
| 133 | Pendimethalin      | 4.6                     | 281 → 252      | 5         | 252 → 191       | 10        | 252 → 162        | 10        |
| 134 | Pentachloroaniline | 4.6                     | 265 → 203      | 30        | 265 → 194       | 30        | 265 → 192        | 30        |
| 135 | Permethrins        | 4.2                     | 183 → 153      | 15        | 183 → 77        | 35        |                  |           |
| 136 | Phenothrin         | 5.8                     | 183 → 168      | 10        | 183 → 155       | 10        | 183 → 77         | 30        |
| 137 | Phorate            | 5.4                     | 260 → 75       | 10        | 231 → 175       | 10        | 231 → 129        | 25        |
| 138 | Phorate sulfone    | 4.0                     | 215 → 115      | 15        | 199 → 143       | 10        | 199 → 97         | 20        |
| 139 | Phosalone          | 4.4                     | 182 → 111      | 20        | 182 → 102       | 20        | 182 → 75         | 40        |
| 140 | Phosmet            | 5.5                     | 160 → 133      | 15        | 160 → 77        | 25        | 160 → 51         | 40        |
| 141 | Piperonyl butoxide | 5.4                     | 176 → 131      | 10        | 176 → 103       | 20        | 176 → 91         | 40        |
| 142 | Pirimicarb         | 5.2                     | 166 → 71       | 40        | 166 → 55        | 20        | 166 → 42         | 40        |
| 143 | Pirimiphos         | 4.1                     | 318 → 166      | 15        | 318 → 168       | 25        | 318 → 182        | 10        |
| 144 | Prochloraz         | 4.5                     | 180 → 138      | 10        | 196 → 97        | 30        | 308 → 70         | 15        |
| 145 | Profenofos         | 5.8                     | 337 → 267      | 15        | 337 → 249       | 30        | 337 → 188        | 30        |
| 146 | Prometryn          | 4.8                     | 241 → 184      | 10        | 241 → 58        | 15        | 226 → 184        | 10        |
| 147 | Propachlor         | 4.3                     | 176 → 120      | 5         | 176 → 92        | 15        | 176 → 77         | 30        |
| 148 | Propanil           | 3.6                     | 219 → 163      | 10        | 217 → 161       | 10        | 161 → 99         | 30        |
| 149 | Propetamphos       | 4.2                     | 236 → 194      | 5         | 236 → 166       | 15        | 236 → 88         | 25        |
| 150 | Propiconazole      | 3.9                     | 259 → 191      | 5         | 259 → 173       | 15        | 259 → 69         | 5         |
| 151 | Propoxur           | 5.2                     | 152 → 110      | 10        | 110 → 92        | 10        | 110 → 64         | 10        |
| 152 | Pyraclufos         | 3.6                     | 360 → 194      | 10        | 360 → 139       | 15        | 360 → 97         | 40        |
| 153 | Pyraclostrobin     | 5.7                     | 132 → 77       | 20        | 132 → 51        | 40        |                  |           |
| 154 | Pyrazophos         | 6.4                     | 373 → 265      | 5         | 373 → 232       | 10        | 373 → 221        | 15        |
| 155 | Pyridaben          | 5.6                     | 147 → 132      | 15        | 147 → 117       | 25        | 147 → 91         | 40        |
| 156 | Pyrifenoxy         | 5.8                     | 262 → 227      | 10        | 262 → 192       | 20        | 262 → 91         | 20        |
| 157 | Pyrimethanil       | 4.9                     | 198 → 158      | 20        | 198 → 118       | 15        | 198 → 90         | 35        |
| 158 | Pyriproxyfen       | 4.0                     | 136 → 96       | 10        | 136 → 78        | 30        | 136 → 51         | 40        |
| 159 | Quintozene         | 5.5                     | 295 → 237      | 20        | 237 → 143       | 30        | 237 → 119        | 30        |
| 160 | Simazine           | 4.0                     | 201 → 186      | 5         | 201 → 173       | 5         | 186 → 96         | 10        |
| 161 | Spirodiclofen      | 3.9                     | 312 → 259      | 5         | 312 → 195       | 25        | 312 → 109        | 5         |

| No.  | Analyte                          | $t_R$<br>(min) | MRM I<br>( $m/z$ ) | CE<br>(V) | MRM II<br>( $m/z$ ) | CE<br>(V) | MRM III<br>( $m/z$ ) | CE<br>(V) |
|------|----------------------------------|----------------|--------------------|-----------|---------------------|-----------|----------------------|-----------|
| 162  | Spiromesifen                     | 5.8            | 272 → 231          | 15        | 272 → 226           | 15        | 272 → 209            | 15        |
| 163  | Sulprofos                        | 5.3            | 322 → 198          | 15        | 322 → 156           | 15        | 322 → 139            | 15        |
| 164  | Tebuconazole                     | 5.1            | 250 → 153          | 10        | 250 → 125           | 20        | 250 → 70             | 15        |
| 165  | Tebuthiuron                      | 5.2            | 171 → 156          | 5         | 156 → 74            | 20        | 156 → 62             | 30        |
| 166  | Tefluthrin                       | 3.3            | 177 → 127          | 20        | 177 → 87            | 40        |                      |           |
| 167  | Terbufos                         | 4.0            | 288 → 231          | 5         | 288 → 129           | 30        | 288 → 57             | 30        |
| 168  | Tetrachlorvinphos                | 4.0            | 331 → 222          | 40        | 331 → 109           | 25        | 331 → 79             | 25        |
| 169  | Tetraconazole                    | 4.7            | 336 → 218          | 15        | 336 → 204           | 30        | 336 → 156            | 30        |
| 170  | Tetrahydrophthalimide            | 4.5            | 151 → 122          | 10        | 151 → 105           | 20        | 151 → 79             | 25        |
| 171  | Tetramethrin                     | 5.3            | 164 → 107          | 5         | 164 → 91            | 20        | 164 → 79             | 20        |
| 172  | Thiamethoxam                     | 4.5            | 182 → 149          | 30        | 182 → 81            | 5         | 182 → 96             | 25        |
| 173  | Thiobencarb                      | 4.4            | 257 → 100          | 10        | 125 → 89            | 20        | 125 → 63             | 40        |
| 174  | Tolyfluanid                      | 4.6            | 346 → 137          | 20        | 238 → 137           | 10        | 346 → 181            | 5         |
| 175  | Triadimenol                      | 4.6            | 168 → 70           | 10        | 168 → 112           | 10        | 168 → 57             | 20        |
| 176  | Triazophos                       | 4.6            | 257 → 134          | 30        | 161 → 91            | 20        |                      |           |
| 177  | Triadimefon                      | 4.6            | 208 → 127          | 15        | 208 → 111           | 25        | 208 → 75             | 40        |
| 178  | Tribufos                         | 4.8            | 169 → 113          | 5         | 169 → 95            | 25        | 169 → 57             | 5         |
| 179  | Tridiphane                       | 4.3            | 285 → 219          | 25        | 285 → 189           | 5         | 285 → 159            | 20        |
| 180  | Trifloxystrobin                  | 5.1            | 172 → 145          | 25        | 116 → 89            | 30        | 116 → 63             | 30        |
| 181  | Triflumizole                     | 4.6            | 206 → 186          | 10        | 206 → 179           | 20        | 206 → 144            | 30        |
| 182  | Trifluralin                      | 3.7            | 306 → 264          | 5         | 306 → 206           | 15        | 264 → 160            | 10        |
| 183  | Vinclozolin                      | 4.2            | 285 → 178          | 10        | 212 → 145           | 30        | 212 → 109            | 40        |
| ISTD | $^{13}C_{12}$ - <i>p,p'</i> -DDE | 3.1            | 330 → 258          | 40        | 258 → 188           | 40        |                      |           |
| ISTD | $^{13}C_{12}$ -PCB 153           | 4.3            | 372 → 302          | 25        | 372 → 300           | 40        |                      |           |
| ISTD | Atrazine- $d_5$                  | 4.5            | 205 → 105          | 15        | 205 → 127           | 10        |                      |           |
| QC   | <i>p</i> -Terphenyl- $d_{14}$    | 3.9            | 244 → 212          | 40        | 244 → 160           | 40        |                      |           |

**Table S3.** UHPLC-MS/MS conditions for the analysis of the targeted analytes ( $t_R$  = retention time; DP = declustering potential; CE = collision energy, CXP = collision exit potential; MRM = multiple reaction monitoring ion transition; ISTD = internal standard; QC = quality control).

| No. | Analyte                     | $t_R$<br>(min) | DP<br>(V) | MRM I<br>(m/z) | CE (CXP)<br>(V) | MRM II<br>(m/z) | CE (CXP)<br>(V) | MRM III<br>(m/z) | CE (CXP)<br>(V) |
|-----|-----------------------------|----------------|-----------|----------------|-----------------|-----------------|-----------------|------------------|-----------------|
| 1   | Acetamiprid                 | 4.4            | 71        | 223 → 126      | 27 (6)          | 223 → 90        | 51 (6)          | 223 → 56         | 19 (10)         |
| 2   | Albendazole                 | 5.4            | 89        | 266 → 234      | 27 (12)         | 266 → 191       | 45 (10)         | 266 → 192        | 39 (10)         |
| 3   | Albendazole sulfone         | 4.5            | 85        | 298 → 159      | 47 (8)          | 298 → 224       | 37 (12)         | 298 → 131        | 67 (6)          |
| 4   | Albendazole sulfoxide       | 4.0            | 66        | 282 → 240      | 19 (12)         | 282 → 208       | 33 (10)         | 282 → 159        | 53 (5)          |
| 5   | Albendazole, 2-aminosulfone | 3.3            | 85        | 240 → 133      | 39 (6)          | 240 → 198       | 27 (10)         | 240 → 150        | 69 (12)         |
| 6   | Aldicarb sulfone            | 3.1            | 41        | 223 → 148      | 13 (8)          | 223 → 86        | 19 (4)          | 223 → 76         | 11(4)           |
| 7   | Aldicarb sulfoxide          | 2.8            | 26        | 207 → 132      | 9 (6)           | 207 → 89        | 19 (6)          | 207 → 105        | 15 (6)          |
| 8   | Atrazine                    | 5.8            | 66        | 216 → 174      | 25 (10)         | 216 → 104       | 37 (6)          | 216 → 96         | 33 (6)          |
| 9   | Atrazine-desethyl           | 4.3            | 70        | 188 → 146      | 23 (6)          | 188 → 104       | 33 (6)          | 188 → 79         | 33 (4)          |
| 10  | Azoxystrobin                | 6.6            | 91        | 404 → 372      | 21 (16)         | 404 → 344       | 35 (16)         | 404 → 329        | 43 (14)         |
| 11  | Bacitracin                  | 4.7            | 80        | 475 → 670      | 19 (10)         | 475 → 86        | 21 (10)         | 475 → 227        | 29 (12)         |
| 12  | Bentazon                    | 5.5            | 61        | 241 → 199      | 15 (10)         | 241 → 107       | 35 (8)          | 241 → 135        | 29 (6)          |
| 13  | Bispyribac-Na               | 6.5            | 64        | 431 → 275      | 25 (8)          | 431 → 243       | 47 (6)          | 431 → 119        | 57 (18)         |
| 14  | Bithionol                   | 7.9            | -60       | 355 → 161      | -30 (-9)        | 355 → 163       | -30 (-9)        | 355 → 194        | -34 (-1)        |
| 15  | Boscalid                    | 6.7            | 90        | 343 → 307      | 27 (6)          | 343 → 272       | 43 (12)         | 343 → 140        | 25 (6)          |
| 16  | Brombuterol                 | 4.2            | 51        | 367 → 293      | 25 (16)         | 367 → 214       | 41 (12)         | 367 → 212        | 41 (12)         |
| 17  | Bromchlorbuterol            | 4.0            | 46        | 323 → 249      | 25 (6)          | 323 → 305       | 17 (6)          | 323 → 168        | 39 (10)         |
| 18  | Buprofezin                  | 7.6            | 56        | 306 → 201      | 17 (10)         | 306 → 57        | 37 (10)         | 306 → 106        | 33 (6)          |
| 19  | Cambendazole                | 4.5            | 70        | 303 → 261      | 25 (14)         | 303 → 217       | 37 (12)         | 303 → 190        | 53 (10)         |
| 20  | Carazolol                   | 4.3            | 77        | 299 → 116      | 27 (6)          | 299 → 222       | 27 (12)         | 299 → 194        | 39 (10)         |
| 21  | Carbadox                    | 3.6            | 36        | 263 → 231      | 19 (12)         | 263 → 130       | 27 (6)          | 263 → 229        | 25 (12)         |
| 22  | Carbadox metabolite (2-QCA) | 3.7            | 55        | 175 → 131      | 21 (6)          | 175 → 102       | 41 (14)         | 175 → 129        | 23 (6)          |
| 23  | Carbaryl                    | 5.6            | 91        | 202 → 145      | 15 (6)          | 202 → 127       | 37 (6)          | 202 → 117        | 33 (6)          |
| 24  | Carbofuran                  | 5.4            | 41        | 222 → 123      | 29 (8)          | 222 → 165       | 17 (10)         | 222 → 77         | 57 (12)         |
| 25  | Carboxin                    | 5.6            | 71        | 236 → 143      | 21 (4)          | 236 → 87        | 31 (6)          | 236 → 93         | 49 (6)          |
| 26  | Carfentrazone               | 7.2            | 115       | 412 → 366      | 25 (16)         | 412 → 346       | 31 (16)         | 412 → 384        | 19 (18)         |

| No. | Analyte                    | t <sub>R</sub><br>(min) | DP<br>(V) | MRM I<br>(m/z) | CE (CXP)<br>(V) | MRM II<br>(m/z) | CE (CXP)<br>(V) | MRM III<br>(m/z) | CE (CXP)<br>(V) |
|-----|----------------------------|-------------------------|-----------|----------------|-----------------|-----------------|-----------------|------------------|-----------------|
| 27  | Cefazolin                  | 3.8                     | 35        | 455 → 323      | 15 (16)         | 455 → 156       | 23 (8)          | 455 → 295        | 23 (14)         |
| 28  | Chlorantraniliprole        | 6.3                     | 66        | 484 → 453      | 23 (22)         | 484 → 286       | 19 (8)          | 484 → 177        | 61 (8)          |
| 29  | Chlorfenvinphos            | 7.3                     | 56        | 359 → 155      | 17 (8)          | 358 → 99        | 43 (6)          | 359 → 170        | 53 (8)          |
| 30  | Chlorimuron                | 6.7                     | 86        | 415 → 186      | 25 (10)         | 415 → 213       | 19 (6)          | 415 → 121        | 55 (16)         |
| 31  | Chlortetracycline          | 4.2                     | 56        | 479 → 444      | 29(20)          | 479 → 444       | 37 (8)          | 479 → 444        | 37 (8)          |
| 32  | Cimaterol                  | 2.5                     | 34        | 220 → 143      | 31 (6)          | 220 → 116       | 45 (18)         | 220 → 89         | 61 (10)         |
| 33  | Ciprofloxacin              | 3.5                     | 97        | 332 → 314      | 27 (14)         | 332 → 231       | 49 (12)         | 332 → 245        | 33 (12)         |
| 34  | Ciprofloxacin, desethylene | 3.3                     | 19        | 306 → 268      | 35 (14)         | 306 → 217       | 51 (12)         | 306 → 288        | 25 (14)         |
| 35  | Clenbuterol                | 3.8                     | 41        | 277 → 203      | 23 (10)         | 277 → 132       | 37 (6)          | 277 → 259        | 15 (14)         |
| 36  | Clencyclohexerol           | 3.4                     | 61        | 319 → 301      | 19 (16)         | 319 → 203       | 29 (12)         |                  |                 |
| 37  | Clenpenterol               | 4.3                     | 71        | 291 → 203      | 23 (12)         | 291 → 132       | 39 (8)          | 291 → 168        | 41 (10)         |
| 38  | Clethodim                  | 7.8                     | 45        | 360 → 164      | 27 (14)         | 360 → 136       | 30 (14)         | 360 → 240        | 10 (14)         |
| 39  | Clofentezine               | 7.4                     | 56        | 303 → 138      | 19 (8)          | 303 → 102       | 51 (4)          | 303 → 75         | 79 (10)         |
| 40  | Clorsulon                  | 4.5                     | -90       | 380 → 344      | 6 (7)           | 380 → 242       | -32 (3)         | 380 → 342        | 6 (17)          |
| 41  | Cyazofamid                 | 7.1                     | 40        | 325 → 108      | 17 (8)          | 324 → 261       | 13 (14)         | 325 → 217        | 27 (12)         |
| 42  | Cymoxanil                  | 4.6                     | 31        | 199 → 128      | 11 (6)          | 199 → 111       | 25 (6)          | 199 → 83         | 33 (12)         |
| 43  | Cyproconazole              | 6.7                     | 89        | 292 → 70       | 23 (18)         | 292 → 125       | 39 (18)         | 292 → 89         | 83 (14)         |
| 44  | Danofloxacin               | 3.6                     | 84        | 358 → 340      | 31 (16)         | 358 → 314       | 25 (16)         | 358 → 283        | 33 (14)         |
| 45  | Dapsone                    | 3.7                     | 111       | 249 → 156      | 21 (8)          | 249 → 108       | 29 (18)         | 249 → 92         | 31 (12)         |
| 46  | Diazinon                   | 7.4                     | 80        | 305 → 169      | 29 (8)          | 305 → 153       | 27 (8)          | 305 → 97         | 47 (6)          |
| 47  | Diclofenac                 | 7.0                     | 30        | 296 → 214      | 45 (12)         | 296 → 215       | 27 (12)         | 296 → 250        | 19 (12)         |
| 48  | Dicloxacillin              | 6.1                     | 40        | 470 → 160      | 19 (10)         | 470 → 311       | 19 (16)         | 470 → 114        | 65 (18)         |
| 49  | Difenoconazole             | 7.5                     | 72        | 406 → 251      | 33 (14)         | 406 → 337       | 23 (16)         | 406 → 188        | 61 (10)         |
| 50  | Difloxacin                 | 3.9                     | 91        | 400 → 382      | 31 (12)         | 400 → 299       | 37 (14)         | 400 → 356        | 27 (18)         |
| 51  | Diflubenzuron              | 6.9                     | 71        | 311 → 158      | 21 (8)          | 311 → 141       | 45 (8)          | 311 → 113        | 47 (20)         |
| 52  | Diflufenzopyr              | 5.7                     | 81        | 335 → 206      | 15 (8)          | 335 → 162       | 23 (6)          | 335 → 78         | 55 (10)         |
| 53  | Dimethoate                 | 4.3                     | 56        | 230 → 199      | 13 (8)          | 230 → 125       | 29 (6)          | 230 → 171        | 21 (8)          |
| 54  | Dimethomorph               | 6.5                     | 91        | 388 → 301      | 29 (16)         | 388 → 165       | 41 (8)          | 388 → 139        | 43 (6)          |
| 55  | Dimetridazole              | 2.9                     | 38        | 142 → 96       | 23 (16)         | 142 → 95        | 31 (14)         | 142 → 81         | 35 (12)         |

| No. | Analyte                | t <sub>R</sub><br>(min) | DP<br>(V) | MRM I<br>(m/z) | CE (CXP)<br>(V) | MRM II<br>(m/z) | CE (CXP)<br>(V) | MRM III<br>(m/z) | CE (CXP)<br>(V) |
|-----|------------------------|-------------------------|-----------|----------------|-----------------|-----------------|-----------------|------------------|-----------------|
| 56  | Dimetridazole, hydroxy | 2.6                     | 36        | 158 → 140      | 17 (6)          | 158 → 112       | 25 (18)         |                  |                 |
| 57  | Dimoxystrobin          | 7.1                     | 46        | 327 → 205      | 15 (10)         | 327 → 116       | 29 (8)          | 327 → 238        | 15 (12)         |
| 58  | Dinotefuran            | 2.9                     | 66        | 203 → 129      | 15 (6)          | 203 → 157       | 11 (4)          | 203 → 113        | 15 (6)          |
| 59  | Diuron                 | 5.9                     | 80        | 233 → 72       | 21 (12)         | 233 → 46        | 37 (8)          | 233 → 160        | 33 (8)          |
| 60  | Doxycycline            | 4.5                     | 61        | 445 → 428      | 25 (20)         | 445 → 321       | 43 (16)         | 445 → 267        | 49 (14)         |
| 61  | Emamectin              | 7.3                     | 32        | 887 → 158      | 41 (8)          | 887 → 82        | 119 (12)        | 887 → 302        | 39 (16)         |
| 62  | Enrofloxacin           | 3.6                     | 84        | 360 → 342      | 29 (16)         | 360 → 245       | 37 (12)         | 360 → 316        | 27 (16)         |
| 63  | Epoxiconazole          | 6.9                     | 59        | 330 → 121      | 51 (8)          | 330 → 101       | 81 (4)          | 330 → 95         | 91 (18)         |
| 64  | Erythromycin A         | 5.3                     | 67        | 734 → 576      | 27 (26)         | 734 → 83        | 89 (12)         | 734 → 158        | 37 (8)          |
| 65  | Fenamidone             | 6.6                     | 66        | 312 → 236      | 21 (10)         | 312 → 92        | 41(4)           | 312 → 103        | 27 (6)          |
| 66  | Fenamiphos             | 6.9                     | 130       | 304 → 217      | 43 (12)         | 304 → 202       | 49 (6)          | 304 → 234        | 19 (10)         |
| 67  | Fenarimol              | 6.7                     | 80        | 331 → 268      | 31 (12)         | 331 → 189       | 63 (10)         | 331 → 139        | 45 (6)          |
| 68  | Fenbendazole           | 6.1                     | 91        | 300 → 268      | 29 (14)         | 300 → 159       | 47 (8)          | 300 → 131        | 59 (6)          |
| 69  | Fenbendazole sulfone   | 5.1                     | 114       | 332 → 300      | 31 (16)         | 332 → 159       | 49 (8)          | 332 → 131        | 61 (6)          |
| 70  | Fenoterol              | 2.9                     | 86        | 304 → 135      | 25 (6)          | 304 → 107       | 41 (18)         | 304 → 152        | 27 (8)          |
| 71  | Fenoxycarb             | 7.0                     | 71        | 302 → 116      | 15 (8)          | 302 → 88        | 29 (10)         | 302 → 256        | 17 (12)         |
| 72  | Fenpyroximate          | 8.3                     | 76        | 422 → 366      | 23 (16)         | 422 → 138       | 39 (6)          | 422 → 215        | 35 (8)          |
| 73  | Fenthion               | 7.3                     | 111       | 279 → 247      | 19 (12)         | 279 → 169       | 23 (10)         | 279 → 105        | 29 (8)          |
| 74  | Fenthion sulfone       | 5.9                     | 114       | 311 → 125      | 27 (6)          | 311 → 279       | 25 (12)         | 311 → 109        | 37 (6)          |
| 75  | Florfenicol            | 4.2                     | 21        | 358 → 241      | 23 (12)         | 358 → 206       | 35 (12)         | 358 → 170        | 41 (8)          |
| 76  | Flubendazole           | 5.6                     | 80        | 314 → 282      | 31 (14)         | 314 → 123       | 47 (6)          | 314 → 95         | 55 (14)         |
| 77  | Flubendazole, 2-amino  | 4.3                     | 116       | 256 → 123      | 37 (6)          | 256 → 95        | 47 (14)         | 256 → 75         | 85 (10)         |
| 78  | Flufenacet             | 7.0                     | 51        | 364 → 152      | 25 (8)          | 364 → 194       | 15 (8)          | 364 → 124        | 25 (22)         |
| 79  | Flumequine             | 5.5                     | 63        | 262 → 244      | 27 (12)         | 262 → 202       | 45 (10)         | 262 → 200        | 47 (12)         |
| 80  | Fluopyram              | 6.8                     | 110       | 397 → 173      | 37 (8)          | 397 → 145       | 73 (8)          | 397 → 208        | 29 (10)         |
| 81  | Fluoxastrobin          | 7.0                     | 54        | 459 → 427      | 25 (24)         | 459 → 188       | 45 (8)          | 459 → 367        | 31 (16)         |
| 82  | Flutolanil             | 6.8                     | 90        | 324 → 242      | 35 (10)         | 324 → 262       | 25 (6)          | 324 → 282        | 19 (12)         |
| 83  | Flutriafol             | 5.8                     | 81        | 302 → 70       | 19 (4)          | 302 → 123       | 31 (6)          | 302 → 95         | 71 (16)         |
| 84  | Fluxapyroxad           | 6.7                     | 86        | 382 → 362      | 23 (16)         | 382 → 342       | 31 (16)         | 382 → 314        | 39 (6)          |

| No. | Analyte              | t <sub>R</sub><br>(min) | DP<br>(V) | MRM I<br>(m/z) | CE (CXP)<br>(V) | MRM II<br>(m/z) | CE (CXP)<br>(V) | MRM III<br>(m/z) | CE (CXP)<br>(V) |
|-----|----------------------|-------------------------|-----------|----------------|-----------------|-----------------|-----------------|------------------|-----------------|
| 85  | Foramsulfuron        | 5.4                     | -30       | 451 → 268      | -32 (-5)        | 451 → 296       | - 8 (-5)        | 451 → 252        | -32 (-3)        |
| 86  | Hexythiazox          | 8.1                     | 81        | 353 → 228      | 21 (10)         | 353 → 168       | 33 (8)          | 353 → 271        | 19 (12)         |
| 87  | Imazalil             | 5.3                     | 55        | 297 → 159      | 37 (8)          | 297 → 201       | 21 (8)          | 297 → 255        | 21 (12)         |
| 88  | Imazapyr             | 3.8                     | 71        | 262 → 217      | 29 (4)          | 262 → 149       | 35 (10)         | 262 → 78         | 75 (12)         |
| 89  | Imidacloprid         | 4.1                     | 60        | 256 → 175      | 23 (12)         | 256 → 209       | 27 (10)         | 256 → 84         | 21 (10)         |
| 90  | Indoxacarb           | 7.6                     | 55        | 528 → 249      | 23 (13)         | 528 → 293       | 19 (6)          | 528 → 150        | 31 (6)          |
| 91  | Iprodione            | 7.0                     | 71        | 330 → 245      | 21 (12)         | 330 → 288       | 17 (14)         | 330 → 162        | 37 (10)         |
| 92  | Iprovalicarb         | 6.8                     | 51        | 321 → 119      | 25 (8)          | 321 → 203       | 13 (6)          | 321 → 116        | 29 (8)          |
| 93  | Lasalosisid A        | 10.2                    | -85       | 589 → 235      | -40 (-3)        | 589 → 173       | -54 ( )         | 589 → 191        | -46 (-3)        |
| 94  | Levamisole           | 3.0                     | 82        | 205 → 178      | 29 (10)         | 205 → 123       | 39 (8)          | 205 → 117        | 39 (6)          |
| 95  | Lincomycin           | 3.1                     | 66        | 407 → 126      | 33 (6)          | 407 → 359       | 25 (18)         | 407 → 82         | 107 (12)        |
| 96  | Linuron              | 6.4                     | 63        | 249 → 160      | 25 (6)          | 249 → 182       | 23 (8)          | 249 → 88         | 14 (6)          |
| 97  | Lufenuron            | 8.0                     | 76        | 511 → 158      | 25 (8)          | 511 → 141       | 63 (8)          | 511 → 113        | 109 (12)        |
| 98  | Mabuterol            | 4.3                     | 41        | 311 → 237      | 25 (12)         | 311 → 217       | 35 (12)         | 311 → 202        | 43 (10)         |
| 99  | Mebendazole          | 5.4                     | 80        | 296 → 264      | 29 (14)         | 296 → 105       | 43 (14)         | 296 → 186        | 45 (10)         |
| 100 | Mebendazole, 2-amino | 4.1                     | 121       | 238 → 105      | 35 (12)         | 238 → 133       | 47 (6)          | 238 → 106        | 59 (12)         |
| 101 | Meloxicam            | 6.3                     | 66        | 352 → 115      | 23 (8)          | 352 → 141       | 25 (6)          | 352 → 73         | 71 (12)         |
| 102 | Mephosfolan          | 5.2                     | 76        | 270 → 140      | 33 (6)          | 270 → 196       | 19 (10)         | 270 → 168        | 23 (10)         |
| 103 | Metalaxyl            | 6.1                     | 66        | 280 → 220      | 19 (4)          | 280 → 192       | 25 (8)          | 280 → 248        | 15 (10)         |
| 104 | Metazachlor          | 6.1                     | 51        | 278 → 134      | 29 (6)          | 278 → 210       | 15 (10)         | 278 → 105        | 55 (12)         |
| 105 | Metconazole          | 7.3                     | 79        | 320 → 70       | 61 (8)          | 320 → 125       | 57 (6)          | 320 → 89         | 97 (10)         |
| 106 | Methiocarb           | 6.4                     | 85        | 226 → 169      | 13(8)           | 226 → 121       | 25 (6)          | 226 → 77         | 33 (6)          |
| 107 | Methiocarb sulfoxide | 4.0                     | 41        | 242 → 185      | 19 (10)         | 242 → 122       | 39 (6)          | 242 → 170        | 31 (10)         |
| 108 | Methomyl             | 3.3                     | 76        | 163 → 88       | 13 (8)          | 163 → 106       | 13 (8)          | 163 → 122        | 7 (4)           |
| 109 | Metsulfuron-methyl   | 5.4                     | 86        | 382 → 167      | 21 (10)         | 382 → 141       | 21 (6)          | 382 → 199        | 29 (10)         |
| 110 | Monensin (Na adduct) | 9.3                     | 71        | 693 → 461      | 71 (22)         | 693 → 479       | 71 (22)         | 693 → 501        | 69 (22)         |
| 111 | Monocrotophos        | 3.4                     | 61        | 224 → 193      | 11 (10)         | 224 → 127       | 21 (6)          | 224 → 98         | 15 (16)         |
| 112 | Monuron              | 5.2                     | 56        | 199 → 72       | 19 (8)          | 199 → 126       | 33 (6)          | 199 → 99         | 51 (16)         |
| 113 | Morantel             | 3.9                     | 74        | 221 → 123      | 47 (6)          | 221 → 111       | 33 (18)         | 221 → 150        | 39 (10)         |

| No. | Analyte              | $t_R$<br>(min) | DP<br>(V) | MRM I<br>(m/z) | CE (CXP)<br>(V) | MRM II<br>(m/z) | CE (CXP)<br>(V) | MRM III<br>(m/z) | CE (CXP)<br>(V) |
|-----|----------------------|----------------|-----------|----------------|-----------------|-----------------|-----------------|------------------|-----------------|
| 114 | Nafcillin            | 6.2            | 41        | 415 → 199      | 19 (10)         | 415 → 171       | 47 (8)          | 415 → 115        | 97 (16)         |
| 115 | Nalidixic acid       | 5.4            | 46        | 233 → 215      | 21 (12)         | 233 → 187       | 35 (10)         | 233 → 159        | 43 (8)          |
| 116 | Naproxen             | 6.2            | 96        | 231 → 185      | 21 (10)         | 231 → 170       | 35 (10)         | 231 → 141        | 61 (6)          |
| 117 | Nitroxinil           | 5.4            | -56       | 289 → 162      | -28 (-9)        | 289 → 127       | -32 (3)         | 289 → 215        | -34 (1)         |
| 118 | Norflurazon          | 6.0            | 76        | 304 → 284      | 33 (44)         | 304 → 160       | 41 (28)         | 304 → 145        | 63 (6)          |
| 119 | Novaluron            | 7.7            | 91        | 493 → 158      | 23 (4)          | 493 → 141       | 67 (4)          | 493 → 113        | 80 (10)         |
| 120 | Omethoate            | 2.6            | 51        | 214 → 183      | 15 (10)         | 214 → 125       | 29 (8)          | 214 → 155        | 21 (8)          |
| 121 | Ormetoprim           | 3.5            | 100       | 275 → 123      | 31 (6)          | 275 → 231       | 35 (10)         | 275 → 121        | 53 (6)          |
| 122 | Oxacillin            | 5.8            | 34        | 402 → 243      | 19 (12)         | 402 → 160       | 19 (8)          | 402 → 114        | 49 (18)         |
| 123 | Oxfendazole          | 4.6            | 105       | 316 → 159      | 41 (8)          | 316 → 191       | 29 (10)         | 316 → 284        | 25 (14)         |
| 124 | Oxibendazole         | 4.6            | 103       | 250 → 218      | 27 (12)         | 250 → 176       | 39 (10)         | 250 → 148        | 49 (8)          |
| 125 | Oxolinic acid        | 4.7            | 56        | 262 → 244      | 25 (14)         | 262 → 216       | 39 (12)         | 262 → 160        | 49 (8)          |
| 126 | Oxytetracycline      | 3.5            | 56        | 461 → 426      | 27 (20)         | 461 → 443       | 19 (20)         | 461 → 444        | 19 (20)         |
| 127 | Penicillin G         | 5.3            | 40        | 335 → 176      | 19 (10)         | 335 → 160       | 15 (8)          | 335 → 87         | 59 (14)         |
| 128 | Penoxsulam           | 5.9            | 31        | 484 → 195      | 37 (8)          | 484 → 164       | 45 (10)         | 484 → 444        | 35 (20)         |
| 129 | Phorate sulfone      | 6.1            | 45        | 293 → 171      | 15 (8)          | 293 → 247       | 9 (10)          | 293 → 97         | 45 (6)          |
| 130 | Phorate sulfoxide    | 5.8            | 31        | 277 → 199      | 13 (8)          | 277 → 143       | 27 (6)          | 277 → 171        | 19 (8)          |
| 131 | Phosalone            | 7.5            | 45        | 368 → 182      | 19 (6)          | 368 → 111       | 51 (4)          | 368 → 75         | 60 (4)          |
| 132 | Picoxystrobin        | 7.2            | 71        | 368 → 145      | 25 (12)         | 368 → 205       | 17 (12)         | 368 → 102        | 101 (26)        |
| 133 | Pirimiphos           | 8.0            | 121       | 334 → 198      | 29 (10)         | 334 → 182       | 29 (10)         | 334 → 170        | 43 (10)         |
| 134 | Pirlimycin           | 4.4            | 60        | 411 → 112      | 31 (6)          | 411 → 363       | 25 (18)         | 411 → 56         | 81 (8)          |
| 135 | Piroxicam            | 5.6            | 67        | 332 → 95       | 25 (14)         | 332 → 121       | 29 (6)          | 332 → 164        | 25 (10)         |
| 136 | Primisulfuron-methyl | 6.7            | -25       | 467 → 226      | 8 (1)           | 467 → 176       | -42 (-9)        | 467 → 126        | -70 (3)         |
| 137 | Prochloraz           | 6.9            | 46        | 376 → 308      | 15 (6)          | 376 → 70        | 31 (4)          | 376 → 266        | 21 (16)         |
| 138 | Profenofos           | 7.8            | 86        | 373 → 303      | 25 (42)         | 373 → 345       | 17 (12)         | 373 → 144        | 47 (8)          |
| 139 | Propamocarb          | 3.6            | 91        | 189 → 102      | 23 (16)         | 189 → 144       | 17 (6)          | 189 → 74         | 33 (8)          |
| 140 | Propanil             | 6.3            | 92        | 218 → 162      | 21 (8)          | 218 → 127       | 35 (6)          | 218 → 92         | 48 (6)          |
| 141 | Propiconazole        | 7.3            | 70        | 342 → 159      | 33 (6)          | 342 → 123       | 79 (6)          | 342 → 69         | 23 (4)          |
| 142 | Propoxycarbazone     | 5.9            | 51        | 399 → 199      | 21 (10)         | 399 → 367       | 13 (10)         | 399 → 116        | 41 (6)          |



| No. | Analyte                | $t_R$<br>(min) | DP<br>(V) | MRM I<br>(m/z) | CE (CXP)<br>(V) | MRM II<br>(m/z) | CE (CXP)<br>(V) | MRM III<br>(m/z) | CE (CXP)<br>(V) |
|-----|------------------------|----------------|-----------|----------------|-----------------|-----------------|-----------------|------------------|-----------------|
| 143 | Prosulfuron            | 6.5            | 96        | 420 → 141      | 23 (6)          | 420 → 167       | 25 (10)         | 420 → 109        | 69 (18)         |
| 144 | Pyraclostrobin         | 7.5            | 65        | 388 → 194      | 17 (4)          | 388 → 163       | 33 (4)          | 388 → 149        | 30 (8)          |
| 145 | Pyridaben              | 8.5            | 51        | 365 → 309      | 17 (14)         | 365 → 117       | 83 (8)          | 365 → 147        | 33 (8)          |
| 146 | Pyrimethanil           | 5.6            | 71        | 200 → 107      | 33 (4)          | 200 → 82        | 33 (6)          | 200 → 80         | 37 (12)         |
| 147 | Quinclorac             | 5.2            | 51        | 242 → 224      | 25 (4)          | 241 → 161       | 51 (10)         | 242 → 196        | 39 (12)         |
| 148 | Quizalofop             | 7.8            | 86        | 373 → 299      | 27 (8)          | 373 → 255       | 45 (10)         | 373 → 163        | 49 (8)          |
| 149 | Ractopamine            | 3.6            | 48        | 302 → 164      | 23 (8)          | 302 → 121       | 29 (6)          | 302 → 107        | 47 (14)         |
| 150 | Ritodrine              | 3.1            | 61        | 288 → 121      | 29 (8)          | 288 → 150       | 27 (8)          | 288 → 103        | 55 (16)         |
| 151 | Ronidazole             | 2.8            | 29        | 201 → 140      | 15 (6)          | 201 → 55        | 29 (8)          | 201 → 54         | 65 (8)          |
| 152 | Saflufenacil           | 6.5            | 90        | 501 → 349      | 37 (8)          | 501 → 459       | 21 (20)         | 501 → 198        | 59 (4)          |
| 153 | Sethoxydim             | 8.0            | 41        | 328 → 178      | 37 (10)         | 328 → 110       | 37 (8)          | 328 → 282        | 29 (12)         |
| 154 | Simazine               | 5.2            | 96        | 202 → 124      | 25 (6)          | 202 → 132       | 25 (4)          | 202 → 104        | 33 (6)          |
| 155 | Spinetoram             | 7.0            | 102       | 748 → 142      | 33 (6)          | 748 → 98        | 105 (16)        | 748 → 97         | 89 (12)         |
| 156 | Spinosyn A             | 6.8            | 85        | 732 → 142      | 37 (6)          | 732 → 98        | 93 (4)          | 732 → 97         | 93 (16)         |
| 157 | Spinosyn D             | 7.0            | 74        | 746 → 142      | 37 (6)          | 746 → 98        | 101 (6)         | 746 → 75         | 52 (6)          |
| 158 | Sulfabromomethazine    | 5.4            | 75        | 357 → 264      | 25 (14)         | 357 → 156       | 27 (8)          | 357 → 202        | 35 (10)         |
| 159 | Sulfachloropyridazine  | 4.1            | 24        | 285 → 156      | 21 (8)          | 285 → 92        | 37 (14)         | 285 → 108        | 31 (18)         |
| 160 | Sulfaclozine           | 4.6            | 56        | 285 → 156      | 23 (8)          | 285 → 108       | 33 (18)         | 285 → 130        | 29 (4)          |
| 161 | Sulfadiazine           | 2.9            | 25        | 251 → 156      | 21 (8)          | 251 → 92        | 33 (14)         | 251 → 108        | 31 (18)         |
| 162 | Sulfadimethoxine       | 4.7            | 69        | 311 → 156      | 27 (8)          | 311 → 108       | 35 (18)         | 311 → 92         | 43 (14)         |
| 163 | Sulfadoxine            | 4.1            | 69        | 311 → 156      | 25 (8)          | 311 → 108       | 33 (16)         | 311 → 92         | 39 (14)         |
| 164 | Sulfaethoxypyridazine  | 4.0            | 47        | 295 → 156      | 25 (8)          | 295 → 140       | 25 (8)          | 295 → 108        | 35 (16)         |
| 165 | Sulfamerazine          | 3.3            | 26        | 265 → 156      | 23 (8)          | 265 → 172       | 23 (10)         | 265 → 108        | 33 (16)         |
| 166 | Sulfamethazine         | 3.6            | 41        | 279 → 186      | 23 (10)         | 279 → 124       | 29 (6)          | 279 → 156        | 25 (8)          |
| 167 | Sulfamethizole         | 3.6            | 29        | 271 → 156      | 19 (8)          | 271 → 92        | 37 (14)         | 271 → 108        | 31 (18)         |
| 168 | Sulfamethoxazole       | 4.1            | 19        | 254 → 156      | 21 (8)          | 254 → 92        | 35 (14)         | 254 → 108        | 31 (8)          |
| 169 | Sulfamethoxypyridazine | 3.9            | 52        | 281 → 156      | 23 (8)          | 281 → 108       | 33 (14)         | 281 → 92         | 39 (14)         |
| 170 | Sulfamonomethoxine     | 3.8            | 71        | 281 → 156      | 23 (8)          | 281 → 108       | 33 (18)         | 281 → 92         | 37 (10)         |
| 171 | Sulfanilamide          | 1.5            | 16        | 173 → 76       | 53 (12)         | 173 → 156       | 11 (8)          | 173 → 75         | 49 (10)         |

| No.  | Analyte                   | $t_R$<br>(min) | DP<br>(V) | MRM I<br>(m/z) | CE (CXP)<br>(V) | MRM II<br>(m/z) | CE (CXP)<br>(V) | MRM III<br>(m/z) | CE (CXP)<br>(V) |
|------|---------------------------|----------------|-----------|----------------|-----------------|-----------------|-----------------|------------------|-----------------|
| 172  | Sulfaquinoxaline          | 4.8            | 66        | 301 → 156      | 23 (8)          | 301 → 92        | 41 (10)         | 301 → 108        | 33 (16)         |
| 173  | Sulfathiazole             | 3.0            | 22        | 256 → 156      | 22 (8)          | 256 → 92        | 37 (14)         | 256 → 80         | 63 (12)         |
| 174  | Sulfisoxazole             | 4.3            | 56        | 268 → 156      | 19 (10)         | 268 → 92        | 35 (16)         | 268 → 113        | 21 (8)          |
| 175  | Sulfoxaflor               | 4.7            | -73       | 276 → 213      | -22 (-1)        | 276 → 261       | -6 (-7)         | 276 → 171        | -40 (-9)        |
| 176  | Tebuthiuron               | 5.1            | 61        | 229 → 172      | 25 (6)          | 229 → 116       | 39 (8)          | 229 → 157        | 37(8)           |
| 177  | Tetrachlorvinphos         | 7.1            | 61        | 367 → 127      | 19 (4)          | 367 → 206       | 51 (10)         | 367 → 241        | 27 (10)         |
| 178  | Tetraconazole             | 6.8            | 72        | 372 → 159      | 37 (8)          | 372 → 70        | 63 (6)          | 372 → 123        | 83 (8)          |
| 179  | Tetracycline              | 3.6            | 52        | 445 → 410      | 27 (10)         | 445 → 154       | 35 (8)          | 445 → 226        | 73 (12)         |
| 180  | Thiabendazole             | 3.8            | 106       | 202 → 175      | 35 (6)          | 202 → 131       | 45 (6)          | 202 → 92         | 47 (8)          |
| 181  | Thiacloprid               | 4.7            | 111       | 253 → 126      | 31 (4)          | 253 → 90        | 51 (6)          | 253 → 99         | 63 (6)          |
| 182  | Thiamphenicol             | 3.5            | 36        | 356 → 308      | 21 (6)          | 356 → 338       | 11 (8)          | 356 → 229        | 31 (16)         |
| 183  | Thidiazuron               | 5.2            | 56        | 221 → 102      | 21 (16)         | 221 → 128       | 23 (6)          | 221 → 94         | 19 (10)         |
| 184  | Thiencarbazone-methyl     | 5.4            | 21        | 391 → 359      | 13 (18)         | 391 → 230       | 23 (12)         | 391 → 130        | 19 (6)          |
| 185  | Thiophanate-methyl        | 5.3            | 101       | 343 → 151      | 25 (8)          | 343 → 311       | 15 (16)         | 343 → 160        | 39 (8)          |
| 186  | Tiamulin                  | 5.4            | 91        | 494 → 192      | 29 (10)         | 494 → 119       | 55 (6)          | 494 → 163        | 39 (10)         |
| 187  | Tilmicosin (++)           | 4.6            | 66        | 435 → 174      | 33 (10)         | 435 → 99        | 25 (16)         | 435 → 696        | 23 (30)         |
| 188  | Triadimenol               | 6.5            | 36        | 296 → 70       | 29 (12)         | 296 → 99        | 21(6)           | 296 → 75         | 97 (12)         |
| 189  | Triclabendazole           | 7.4            | 67        | 359 → 274      | 49 (14)         | 359 → 344       | 37 (18)         | 359 → 171        | 67 (10)         |
| 190  | Triclabendazole sulfoxide | 7.0            | 74        | 375 → 360      | 31 (18)         | 375 → 242       | 63 (12)         | 375 → 313        | 35 (16)         |
| 191  | Trifloxystrobin           | 7.7            | 35        | 409 → 186      | 25 (8)          | 409 → 145       | 61 (6)          | 409 → 206        | 19 (4)          |
| 192  | Triflumuron               | 7.3            | 56        | 359 → 156      | 21 (8)          | 359 → 139       | 45 (6)          | 359 → 75         | 107 (8)         |
| 193  | Trimethoprim              | 3.3            | 121       | 291 → 230      | 33 (12)         | 291 → 261       | 34 (13)         | 291 → 123        | 31 (6)          |
| 194  | Tylosin                   | 5.4            | 69        | 917 → 174      | 47 (10)         | 917 → 772       | 41 (32)         | 917 → 83         | 125 (14)        |
| ISTD | Atrazine- $d_5$           | 5.8            | 96        | 221 → 179      | 25 (8)          |                 |                 |                  |                 |
| ISTD | Fenthion- $d_6$           | 7.3            | 100       | 285 → 253      | 21 (8)          |                 |                 |                  |                 |
| ISTD | Clenbuterol- $d_9$        | 3.9            | 46        | 286 → 204      | 23 (12)         |                 |                 |                  |                 |
| ISTD | Flunixin- $d_3$           | 6.5            | 90        | 300 → 282      | 33 (14)         |                 |                 |                  |                 |
| ISTD | Penicillin G- $d_7$       | 5.3            | 35        | 342 → 160      | 17 (16)         |                 |                 |                  |                 |
| QC   | $^{13}C$ -Phenacetin      | 4.6            | 91        | 181 → 110      | 29 (6)          |                 |                 |                  |                 |

| No.  | Analyte                    | $t_R$<br>(min) | DP<br>(V) | MRM I<br>( $m/z$ ) | CE (CXP)<br>(V) | MRM II<br>( $m/z$ ) | CE (CXP)<br>(V) | MRM III<br>( $m/z$ ) | CE (CXP)<br>(V) |
|------|----------------------------|----------------|-----------|--------------------|-----------------|---------------------|-----------------|----------------------|-----------------|
| ISTD | Pyridaben- $d_{13}$        | 8.4            | 51        | 378 → 160          | 33 (4)          |                     |                 |                      |                 |
| ISTD | Ractopamine- $d_3$         | 3.6            | 56        | 305 → 167          | 21 (10)         |                     |                 |                      |                 |
| ISTD | Phenylbutazone- $d_{10}$   | 6.9            | 56        | 319 → 221          | 23 (12)         |                     |                 |                      |                 |
| ISTD | $^{13}C_6$ -Sulfamethazine | 3.6            | 56        | 285 → 186          | 23 (10)         |                     |                 |                      |                 |

**Table S4.** Overall validation results for the QuEChERSER mega-method in muscle of goat and lamb; ISTD = internal standard,  $t_R$  = retention time, ME = matrix effect, Rec = average recovery, RSD = relative standard deviation (n = 40); bold text indicates |ME| or RSD > 20% and 70% > recovery > 120%. LVL is the lowest validated level that achieved 70-120% recovery with RSD < 20%.

| No. | Analyte                     | ISTD                        | Tool | $t_R$<br>(min) | Goat       |      |           | LVL<br>(ng/g) | Lamb      |            |           | LVL<br>(ng/g) |
|-----|-----------------------------|-----------------------------|------|----------------|------------|------|-----------|---------------|-----------|------------|-----------|---------------|
|     |                             |                             |      |                | %ME        | %Rec | %RSD      |               | %ME       | %Rec       | %RSD      |               |
| 1   | Acephate                    | Atrazine- $d_5$             | GC   | 3.1            | -14        | 88   | 15        | 10            | 14        | 75         | 19        | 10            |
| 2   | Acetamiprid                 | Atrazine- $d_5$             | LC   | 4.3            | -3         | 101  | 13        | 25            | 1         | 101        | 15        | 25            |
| 3   | Alachlor                    | Atrazine- $d_5$             | GC   | 4.3            | -1         | 99   | 6         | 5             | 4         | 108        | 18        | 5             |
| 4   | Albendazole                 | Fenthion- $d_6$             | LC   | 5.4            | -3         | 105  | 13        | 50            | -7        | 74         | <b>25</b> | -             |
| 5   | Albendazole sulfone         | Flunixin- $d_3$             | LC   | 4.5            | -5         | 104  | 13        | 50            | -9        | 101        | 9         | 50            |
| 6   | Albendazole sulfoxide       | Flunixin- $d_3$             | LC   | 4.1            | 0          | 105  | 12        | 50            | 1         | <b>154</b> | 19        | 50            |
| 7   | Albendazole, 2-aminosulfone | Flunixin- $d_3$             | LC   | 3.3            | -3         | 101  | 10        | 50            | 0         | <b>134</b> | 12        | 50            |
| 8   | Aldicarb sulfone            | Atrazine- $d_5$             | LC   | 3.2            | 9          | 85   | <b>27</b> | -             | 14        | 87         | 16        | 5             |
| 9   | Aldicarb sulfoxide          | Atrazine- $d_5$             | LC   | 2.9            | <b>-39</b> | 102  | <b>44</b> | -             | 0         | 85         | <b>22</b> | -             |
| 10  | Aldrin                      | $^{13}C_{12}$ - $p,p'$ -DDE | GC   | 4.5            | -1         | 104  | 5         | 100           | -5        | 94         | 13        | 100           |
| 11  | Atrazine                    | Atrazine- $d_5$             | LC   | 5.8            | -7         | 105  | 9         | 5             | -5        | 95         | 11        | 5             |
|     | Atrazine                    | Atrazine- $d_5$             | GC   | 3.9            | -3         | 109  | 6         | 5             | -2        | 100        | 11        | 5             |
| 12  | Atrazine-desethyl           | Atrazine- $d_5$             | GC   | 3.7            | -5         | 99   | 11        | 5             | -3        | 95         | 14        | 5             |
|     | Atrazine-desethyl           | Atrazine- $d_5$             | LC   | 4.3            | -4         | 98   | 15        | 5             | -3        | 102        | 18        | 10            |
| 13  | Azinphos-ethyl              | Atrazine- $d_5$             | GC   | 5.5            | 4          | 87   | 17        | 5             | <b>42</b> | 95         | <b>26</b> | -             |
| 14  | Azinphos-methyl             | Atrazine- $d_5$             | GC   | 5.4            | -9         | 110  | 13        | 5             | <b>51</b> | 101        | 17        | 5             |

| No. | Analyte               | ISTD                | Tool | $t_R$<br>(min) | Goat       |           |           | LVL<br>(ng/g) | Lamb       |            |           | LVL<br>(ng/g) |
|-----|-----------------------|---------------------|------|----------------|------------|-----------|-----------|---------------|------------|------------|-----------|---------------|
|     |                       |                     |      |                | %ME        | %Rec      | %RSD      |               | %ME        | %Rec       | %RSD      |               |
| 15  | Azoxystrobin          | Atrazine- $d_5$     | LC   | 6.5            | -3         | 105       | 14        | 5             | 11         | 101        | 15        | 5             |
| 16  | Bacitracin            | Flunixin- $d_3$     | LC   | 4.7            | <b>50</b>  | 95        | 11        | 50            | 2          | 111        | <b>31</b> | -             |
| 17  | Benoxacor             | Atrazine- $d_5$     | GC   | 4.2            | 1          | 109       | 5         | 25            | 1          | 89         | 11        | 25            |
| 18  | Bentazon              | Atrazine- $d_5$     | LC   | 5.5            | 12         | 93        | 18        | 10            | 8          | 89         | <b>27</b> | -             |
| 19  | Bifenazate            | Atrazine- $d_5$     | GC   | 5.3            | -1         | <b>30</b> | <b>39</b> | -             | 8          | 70         | <b>32</b> | -             |
| 20  | Bifenthrin            | Pyridaben- $d_{13}$ | GC   | 5.3            | 4          | 86        | 8         | 50            | -2         | 85         | 16        | 50            |
| 21  | Bispyribac            | Atrazine- $d_5$     | LC   | 6.5            | 5          | 103       | 17        | 5             | <b>29</b>  | 98         | 16        | 5             |
| 22  | Bitertanol            | Atrazine- $d_5$     | GC   | 5.7            | 5          | 86        | 14        | 5             | 1          | 80         | 20        | 5             |
| 23  | Bithionol             | Clenbuterol- $d_9$  | LC   | 7.9            | <b>37</b>  | 95        | <b>28</b> | -             | <b>75</b>  | <b>59</b>  | <b>48</b> | -             |
| 24  | Boscalid              | Atrazine- $d_5$     | GC   | 6.1            | 4          | 92        | 15        | 5             | 1          | 107        | <b>21</b> | -             |
|     | Boscalid              | Atrazine- $d_5$     | LC   | 6.6            | -2         | 94        | 13        | 5             | 0          | 96         | 16        | 5             |
| 25  | Brombuterol           | Clenbuterol- $d_9$  | LC   | 4.2            | 2          | 105       | 12        | 5             | 14         | 95         | 12        | 5             |
| 26  | Bromchlorbuterol      | Clenbuterol- $d_9$  | LC   | 4.1            | 3          | 111       | 9         | 5             | 10         | 101        | 12        | 5             |
| 27  | Brompropylate         | Atrazine- $d_5$     | GC   | 5.4            | -22        | 100       | 9         | 5             | <b>61</b>  | 97         | 17        | 5             |
| 28  | Buprofezin            | Atrazine- $d_5$     | GC   | 4.9            | 17         | 102       | 8         | 25            | <b>-27</b> | 104        | 14        | 25            |
|     | Buprofezin            | Atrazine- $d_5$     | LC   | 7.6            | <b>-33</b> | 118       | 16        | 25            | <b>-45</b> | <b>127</b> | <b>31</b> | -             |
| 29  | Cambendazole          | Clenbuterol- $d_9$  | LC   | 4.5            | -3         | 102       | 19        | 5             | 0          | 100        | 11        | 5             |
| 30  | Carazolol             | Clenbuterol- $d_9$  | LC   | 4.3            | 4          | 111       | 11        | 5             | 2          | 75         | <b>33</b> | -             |
| 31  | Carbadox              | Clenbuterol- $d_9$  | LC   | 3.8            | <b>26</b>  | 108       | 14        | 5             | <b>25</b>  | 105        | 17        | 5             |
| 32  | Carbadox met. (2-QCA) | Clenbuterol- $d_9$  | LC   | 3.9            | 11         | 91        | 15        | 5             | 0          | 117        | 13        | 5             |
| 33  | Carbaryl              | Atrazine- $d_5$     | GC   | 4.3            | -22        | 104       | 8         | 25            | <b>85</b>  | 98         | 11        | 25            |
|     | Carbaryl              | Atrazine- $d_5$     | LC   | 5.5            | -4         | 104       | 16        | 25            | -4         | 100        | 14        | 25            |
| 34  | Carbofuran            | Atrazine- $d_5$     | GC   | 3.9            | -5         | 93        | 9         | 5             | <b>47</b>  | 104        | 19        | 5             |
|     | Carbofuran            | Atrazine- $d_5$     | LC   | 5.4            | 1          | 110       | 14        | 5             | 1          | 98         | 18        | 5             |
| 35  | Carbophenothion       | Atrazine- $d_5$     | GC   | 5.1            | -6         | 99        | 11        | 10            | <b>40</b>  | 98         | 16        | 10            |
| 36  | Carboxin              | Atrazine- $d_5$     | LC   | 5.6            | 3          | 103       | 11        | 25            | 10         | 86         | 18        | 25            |
| 37  | Carfentrazone         | Atrazine- $d_5$     | LC   | 7.2            | -7         | 70        | <b>24</b> | -             | 7          | 93         | <b>21</b> | -             |
| 38  | Cefazolin             | Flunixin- $d_3$     | LC   | 3.9            | 2          | 92        | <b>22</b> | -             | 14         | 102        | 10        | 50            |
| 39  | Chlorantraniliprole   | Atrazine- $d_5$     | LC   | 6.3            | -1         | 102       | 11        | 100           | 7          | 97         | 16        | 100           |

| No. | Analyte                    | ISTD                                         | Tool | t <sub>R</sub><br>(min) | Goat       |           |           | LVL<br>(ng/g) | Lamb       |            |           | LVL<br>(ng/g) |
|-----|----------------------------|----------------------------------------------|------|-------------------------|------------|-----------|-----------|---------------|------------|------------|-----------|---------------|
|     |                            |                                              |      |                         | %ME        | %Rec      | %RSD      |               | %ME        | %Rec       | %RSD      |               |
| 40  | <i>cis</i> -Chlordane      | Atrazine- <i>d</i> <sub>5</sub>              | GC   | 4.8                     | -7         | 77        | 12        | 25            | <b>33</b>  | 90         | 13        | 25            |
| 41  | <i>trans</i> -Chlordane    | Atrazine- <i>d</i> <sub>5</sub>              | GC   | 4.8                     | <b>-94</b> | 74        | 14        | 25            | 17         | 88         | 14        | 25            |
| 42  | Chlorfenvinphos            | Atrazine- <i>d</i> <sub>5</sub>              | GC   | 4.6                     | -2         | 96        | 9         | 5             | 15         | 105        | 12        | 5             |
|     | Chlorfenvinphos            | Atrazine- <i>d</i> <sub>5</sub>              | LC   | 7.3                     | 9          | 106       | 13        | 5             | 0          | 95         | 15        | 5             |
| 43  | Chlorimuron                | Atrazine- <i>d</i> <sub>5</sub>              | LC   | 6.6                     | -7         | 101       | 13        | 10            | 9          | 101        | 14        | 10            |
| 44  | Chlorpropham               | Atrazine- <i>d</i> <sub>5</sub>              | GC   | 3.7                     | <b>63</b>  | 104       | 7         | 25            | -5         | 107        | 10        | 25            |
| 45  | Chlorpyrifos               | Atrazine- <i>d</i> <sub>5</sub>              | GC   | 4.4                     | -6         | 99        | 8         | 5             | 11         | 98         | 12        | 5             |
| 46  | Chlorpyrifos-methyl        | Atrazine- <i>d</i> <sub>5</sub>              | GC   | 4.3                     | -3         | 102       | 6         | 5             | 8          | 106        | 9         | 5             |
| 47  | Chlortetracycline          | Flunixin- <i>d</i> <sub>3</sub>              | LC   | 4.3                     | 5          | <b>69</b> | 16        | 50            | <b>-24</b> | 79         | 20        | 100           |
| 48  | Cimaterol                  | Flunixin- <i>d</i> <sub>3</sub>              | LC   | 2.8                     | <b>-23</b> | 98        | 14        | 5             | -5         | 95         | 12        | 5             |
| 49  | Ciprofloxacin              | <sup>13</sup> C <sub>6</sub> -Sulfamethazine | LC   | 3.6                     | 5          | 84        | 14        | 50            | 6          | 74         | 11        | 50            |
| 50  | Ciprofloxacin, desethylene | <sup>13</sup> C <sub>6</sub> -Sulfamethazine | LC   | 3.5                     | -3         | 84        | 13        | 50            | <b>-28</b> | 90         | <b>21</b> | -             |
| 51  | Clenbuterol                | Clenbuterol- <i>d</i> <sub>9</sub>           | LC   | 3.9                     | 0          | 108       | 10        | 5             | 12         | 100        | 9         | 5             |
| 52  | Clencyclohexerol           | Clenbuterol- <i>d</i> <sub>9</sub>           | LC   | 3.4                     | <b>-23</b> | 76        | <b>32</b> | -             | 9          | 116        | 17        | 5             |
| 53  | Clenpenterol               | Clenbuterol- <i>d</i> <sub>9</sub>           | LC   | 4.3                     | <b>-22</b> | 117       | 13        | 5             | <b>-22</b> | 115        | 17        | 5             |
| 54  | Clethodim                  | Atrazine- <i>d</i> <sub>5</sub>              | LC   | 7.8                     | 13         | 97        | 13        | 100           | <b>51</b>  | 91         | <b>22</b> | -             |
| 55  | Clofentezine               | Atrazine- <i>d</i> <sub>5</sub>              | LC   | 7.4                     | 2          | 111       | 17        | 25            | <b>25</b>  | <b>173</b> | <b>27</b> | -             |
| 56  | Clorsulon                  | Flunixin- <i>d</i> <sub>3</sub>              | LC   | 4.5                     | 1          | 94        | <b>25</b> | -             | 6          | 89         | 17        | 18            |
| 57  | Coumaphos                  | Atrazine- <i>d</i> <sub>5</sub>              | GC   | 5.8                     | 3          | 96        | 12        | 5             | 2          | 108        | <b>21</b> | 5             |
| 58  | Cyazofamid                 | Atrazine- <i>d</i> <sub>5</sub>              | LC   | 7.1                     | 4          | 98        | <b>21</b> | -             | -1         | 95         | 20        | 10            |
| 59  | Cyfluthrin                 | Pyridaben- <i>d</i> <sub>13</sub>            | GC   | 5.9                     | 2          | 107       | 9         | 25            | 6          | 112        | 19        | 25            |
| 60  | λ-Cyhalothrin              | Pyridaben- <i>d</i> <sub>13</sub>            | GC   | 5.5                     | -5         | 112       | 6         | 250           | 5          | 112        | 13        | 250           |
| 61  | Cymoxanil                  | Atrazine- <i>d</i> <sub>5</sub>              | LC   | 4.6                     | <b>-22</b> | 111       | 14        | 5             | <b>-42</b> | 112        | <b>27</b> | -             |
| 62  | Cypermethrin               | Pyridaben- <i>d</i> <sub>13</sub>            | GC   | 6.0                     | 4          | 104       | 6         | 50            | 10         | 103        | 12        | 50            |
| 63  | Cyphenothrin               | Pyridaben- <i>d</i> <sub>13</sub>            | GC   | 5.4                     | 5          | 96        | 9         | 50            | -7         | 92         | 16        | 50            |
| 64  | Cyproconazole              | Atrazine- <i>d</i> <sub>5</sub>              | GC   | 5.0                     | -3         | 93        | 12        | 25            | 4          | 111        | 14        | 25            |
|     | Cyproconazole              | Atrazine- <i>d</i> <sub>5</sub>              | LC   | 6.6                     | -5         | 103       | 10        | 25            | 0          | 99         | 12        | 25            |
| 65  | Danofloxacin               | Flunixin- <i>d</i> <sub>3</sub>              | LC   | 3.7                     | 20         | 86        | 16        | 100           | 5          | 79         | 18        | 200           |
| 66  | Dapsone                    | Flunixin- <i>d</i> <sub>3</sub>              | LC   | 3.9                     | 7          | 98        | 12        | 50            | 6          | 95         | 10        | 50            |

| No.   | Analyte                               | ISTD                                             | Tool | t <sub>R</sub><br>(min) | Goat      |           |           | LVL<br>(ng/g) | Lamb       |            |           | LVL<br>(ng/g) |
|-------|---------------------------------------|--------------------------------------------------|------|-------------------------|-----------|-----------|-----------|---------------|------------|------------|-----------|---------------|
|       |                                       |                                                  |      |                         | %ME       | %Rec      | %RSD      |               | %ME        | %Rec       | %RSD      |               |
| 67    | <i>o,p'</i> -DDD                      | Atrazine- <i>d</i> <sub>5</sub>                  | GC   | 4.9                     | 1         | 80        | 11        | 25            | 11         | 100        | 12        | 25            |
| 68    | <i>o,p'</i> -DDE                      | Atrazine- <i>d</i> <sub>5</sub>                  | GC   | 4.7                     | 3         | 93        | 12        | 25            | 4          | 80         | 14        | 25            |
| 69,70 | <i>p,p'</i> -DDD + <i>o,p'</i> -DDT   | Atrazine- <i>d</i> <sub>5</sub>                  | GC   | 5.1                     | <b>22</b> | 88        | 13        | 25            | 8          | 70         | 16        | 25            |
| 71    | <i>p,p'</i> -DDE                      | <sup>13</sup> C <sub>12</sub> - <i>p,p'</i> -DDE | GC   | 4.9                     | 2         | 105       | 6         | 25            | 6          | 101        | 12        | 25            |
| 72    | <i>p,p'</i> -DDT                      | Atrazine- <i>d</i> <sub>5</sub>                  | GC   | 5.2                     | 2         | 88        | 11        | 25            | -12        | 77         | <b>21</b> | -             |
| 73    | Deltamethrin                          | Pyridaben- <i>d</i> <sub>13</sub>                | GC   | 6.6                     | 1         | 97        | 8         | 15            | 4          | 103        | 18        | 15            |
| 74    | Desmedipham                           | Atrazine- <i>d</i> <sub>5</sub>                  | GC   | 3.8                     | -2        | 101       | 14        | 25            | <b>52</b>  | <b>129</b> | <b>25</b> | -             |
| 75    | Diazinon                              | Atrazine- <i>d</i> <sub>5</sub>                  | GC   | 4.0                     | 15        | 103       | 6         | 10            | -15        | 96         | 17        | 10            |
|       | Diazinon                              | Atrazine- <i>d</i> <sub>5</sub>                  | LC   | 7.4                     | -9        | 102       | 10        | 10            | 0          | 111        | 15        | 10            |
| 76    | Dichlormid                            | Atrazine- <i>d</i> <sub>5</sub>                  | GC   | 2.9                     | <b>25</b> | 108       | 6         | 5             | <b>-30</b> | 95         | 12        | 5             |
| 77    | Dichlorvos                            | Atrazine- <i>d</i> <sub>5</sub>                  | GC   | 2.5                     | 19        | <b>59</b> | <b>38</b> | -             | <b>-23</b> | <b>66</b>  | <b>31</b> | -             |
| 78    | Diclofenac                            | Flunixin- <i>d</i> <sub>3</sub>                  | LC   | 7.0                     | 11        | 94        | 12        | 25            | -6         | 98         | 9         | 25            |
| 79    | Dicloxacillin                         | Flunixin- <i>d</i> <sub>3</sub>                  | LC   | 6.1                     | 13        | 105       | 10        | 50            | 11         | 104        | 10        | 50            |
| 80    | Dicofol (as 4,4-dichlorobenzophenone) | Atrazine- <i>d</i> <sub>5</sub>                  | GC   | 4.5                     | 11        | 94        | 9         | 25            | <b>-21</b> | 102        | 11        | 25            |
| 81    | Dicrotophos                           | Atrazine- <i>d</i> <sub>5</sub>                  | GC   | 3.7                     | -5        | 90        | 9         | 25            | <b>26</b>  | 86         | 13        | 25            |
| 82    | Dieldrin                              | Atrazine- <i>d</i> <sub>5</sub>                  | GC   | 4.9                     | 5         | 102       | 10        | 100           | 8          | 107        | 13        | 100           |
| 83    | Difenoconazole                        | Atrazine- <i>d</i> <sub>5</sub>                  | GC   | 6.5                     | -2        | 90        | 16        | 25            | 13         | 77         | <b>29</b> | -             |
|       | Difenoconazole                        | Atrazine- <i>d</i> <sub>5</sub>                  | LC   | 7.4                     | 2         | 112       | 12        | 25            | 4          | 90         | 19        | 25            |
| 84    | Difloxacin                            | Flunixin- <i>d</i> <sub>3</sub>                  | LC   | 4.0                     | 9         | 89        | 18        | 150           | -6         | 95         | 14        | 150           |
| 85    | Diflubenzuron                         | Atrazine- <i>d</i> <sub>5</sub>                  | LC   | 6.9                     | -8        | 106       | 13        | 50            | -4         | 97         | 15        | 50            |
| 86    | Diflufenzopyr                         | Atrazine- <i>d</i> <sub>5</sub>                  | LC   | 5.7                     | 10        | 99        | 9         | 25            | 9          | 96         | 14        | 25            |
| 87    | Dimethoate                            | Atrazine- <i>d</i> <sub>5</sub>                  | GC   | 3.9                     | 2         | 105       | 8         | 25            | 5          | 115        | 13        | 25            |
|       | Dimethoate                            | Atrazine- <i>d</i> <sub>5</sub>                  | LC   | 4.3                     | 2         | 110       | 14        | 25            | 3          | 101        | 15        | 25            |
| 88    | Dimethomorph                          | Atrazine- <i>d</i> <sub>5</sub>                  | GC   | 6.9                     | -1        | 98        | 16        | 10            | -4         | 108        | <b>47</b> | -             |
|       | Dimethomorph                          | Atrazine- <i>d</i> <sub>5</sub>                  | LC   | 6.4                     | -5        | 98        | 11        | 5             | -2         | 101        | 16        | 5             |
| 89    | Dimetridazole                         | Flunixin- <i>d</i> <sub>3</sub>                  | LC   | 3.1                     | 0         | 106       | 13        | 5             | -3         | 102        | 9         | 5             |
| 90    | Dimetridazole, hydroxy                | Clenbuterol- <i>d</i> <sub>9</sub>               | LC   | 2.9                     | <b>24</b> | 103       | <b>26</b> | -             | 9          | 119        | 18        | 5             |
| 91    | Dimoxystrobin                         | Atrazine- <i>d</i> <sub>5</sub>                  | GC   | 5.3                     | -12       | 90        | 11        | 15            | 9          | 89         | 14        | 15            |

| No.     | Analyte             | ISTD                | Tool | $t_R$<br>(min) | Goat       |      |           | LVL<br>(ng/g) | Lamb      |      |           | LVL<br>(ng/g) |
|---------|---------------------|---------------------|------|----------------|------------|------|-----------|---------------|-----------|------|-----------|---------------|
|         |                     |                     |      |                | %ME        | %Rec | %RSD      |               | %ME       | %Rec | %RSD      |               |
|         | Dimoxystrobin       | Atrazine- $d_5$     | LC   | 7.1            | 0          | 92   | 20        | 15            | 6         | 96   | 14        | 15            |
| 92      | Dinotefuran         | Atrazine- $d_5$     | LC   | 2.9            | <b>-30</b> | 109  | <b>26</b> | -             | 4         | 97   | 19        | 50            |
| 93      | Disulfoton          | Atrazine- $d_5$     | GC   | 4.1            | 9          | 100  | 6         | 5             | -9        | 104  | 18        | 5             |
| 94      | Diuron              | Atrazine- $d_5$     | LC   | 5.9            | 11         | 107  | 10        | 25            | 10        | 99   | 13        | 25            |
| 95      | DMPF (amitraz met.) | Atrazine- $d_5$     | GC   | 3.2            | -2         | 110  | 11        | 5             | <b>50</b> | 102  | 15        | 5             |
| 96      | Doxycycline         | Flunixin- $d_3$     | LC   | 4.5            | 12         | 71   | 20        | 50            | 5         | 74   | 11        | 50            |
| 97      | Emamectin           | Flunixin- $d_3$     | LC   | 7.2            | <b>88</b>  | 101  | 16        | 50            | <b>43</b> | 74   | <b>34</b> | -             |
| 98      | Endosulfan I        | Atrazine- $d_5$     | GC   | 4.8            | 0          | 85   | 11        | 25            | 2         | 100  | 11        | 25            |
| 99      | Endosulfan II       | Atrazine- $d_5$     | GC   | 5.0            | 2          | 100  | 7         | 25            | -9        | 100  | 12        | 25            |
| 100     | Endosulfan sulfate  | Atrazine- $d_5$     | GC   | 5.2            | 2          | 99   | 9         | 25            | -5        | 100  | 15        | 25            |
| 101     | Endrin              | Atrazine- $d_5$     | GC   | 5.0            | -2         | 97   | 12        | 25            | 14        | 74   | 18        | 25            |
| 102     | Endrin ketone       | Atrazine- $d_5$     | GC   | 5.4            | -6         | 102  | 7         | 25            | 12        | 88   | 11        | 25            |
| 103     | Enrofloxacin        | Flunixin- $d_3$     | LC   | 3.8            | <b>23</b>  | 89   | 16        | 50            | 3         | 93   | <b>21</b> | -             |
| 104     | Epoxiconazole       | Atrazine- $d_5$     | LC   | 6.8            | -3         | 106  | 16        | 5             | 9         | 95   | 15        | 5             |
| 105     | Erythromycin A      | Flunixin- $d_3$     | LC   | 5.3            | <b>21</b>  | 105  | 11        | 100           | <b>88</b> | 85   | 20        | 100           |
| 106,107 | Es+Fenvalerate      | Pyridaben- $d_{13}$ | GC   | 6.4            | 1          | 107  | 6         | 20            | 5         | 108  | 10        | 20            |
| 108     | Ethalfuralin        | Atrazine- $d_5$     | GC   | 3.7            | -9         | 103  | 8         | 5             | <b>22</b> | 92   | 11        | 5             |
| 109     | Ethion              | Atrazine- $d_5$     | GC   | 5.0            | -10        | 106  | 9         | 5             | 7         | 106  | 15        | 5             |
| 110     | Ethofumesate        | Atrazine- $d_5$     | GC   | 4.4            | <b>-27</b> | 97   | 7         | 15            | <b>55</b> | 115  | 8         | 15            |
| 111     | Ethoprop            | Atrazine- $d_5$     | GC   | 3.6            | -6         | 107  | 6         | 5             | <b>44</b> | 109  | 14        | 5             |
| 112     | Etofenprox          | Pyridaben- $d_{13}$ | GC   | 6.1            | 1          | 91   | 7         | 250           | 3         | 90   | 14        | 250           |
| 113     | Etrimfos            | Atrazine- $d_5$     | GC   | 3.7            | 5          | 99   | 13        | 5             | -7        | 90   | 13        | 5             |
| 114     | Famphur             | Atrazine- $d_5$     | GC   | 5.1            | 2          | 109  | 9         | 25            | -1        | 109  | 13        | 25            |
| 115     | Fenamidone          | Atrazine- $d_5$     | LC   | 6.5            | -6         | 102  | 15        | 5             | 9         | 93   | 13        | 5             |
| 116     | Fenamiphos          | Atrazine- $d_5$     | GC   | 4.8            | 2          | 94   | 16        | 10            | 7         | 110  | 15        | 10            |
|         | Fenamiphos          | Atrazine- $d_5$     | LC   | 6.9            | 2          | 101  | 17        | 10            | 4         | 97   | 14        | 10            |
| 117     | Fenarimol           | Atrazine- $d_5$     | LC   | 6.7            | 8          | 107  | 15        | 10            | 3         | 92   | 15        | 10            |
|         | Fenarimol           | Pyridaben- $d_{13}$ | GC   | 5.7            | 14         | 101  | 13        | 10            | 7         | 114  | 19        | 10            |
| 118     | Fenbendazole        | Flunixin- $d_3$     | LC   | 6.1            | 3          | 120  | 11        | 25            | 0         | 80   | <b>27</b> | -             |

| No. | Analyte               | ISTD                      | Tool | t <sub>R</sub><br>(min) | Goat      |      |      | LVL<br>(ng/g) | Lamb       |            |           | LVL<br>(ng/g) |
|-----|-----------------------|---------------------------|------|-------------------------|-----------|------|------|---------------|------------|------------|-----------|---------------|
|     |                       |                           |      |                         | %ME       | %Rec | %RSD |               | %ME        | %Rec       | %RSD      |               |
| 119 | Fenbendazole sulfone  | Flunixin-d <sub>3</sub>   | LC   | 5.1                     | 14        | 99   | 10   | 25            | 1          | 99         | 10        | 25            |
| 120 | Fenitrothion          | Atrazine-d <sub>5</sub>   | GC   | 4.4                     | -8        | 107  | 9    | 5             | 8          | 110        | 10        | 5             |
| 121 | Fenoterol             | Flunixin-d <sub>3</sub>   | LC   | 3.1                     | 1         | 81   | 14   | 5             | -8         | 76         | <b>22</b> | -             |
| 122 | Fenoxycarb            | Atrazine-d <sub>5</sub>   | GC   | 5.3                     | 5         | 104  | 8    | 25            | 10         | <b>122</b> | <b>28</b> | -             |
|     | Fenoxycarb            | Atrazine-d <sub>5</sub>   | LC   | 7.0                     | 1         | 105  | 16   | 25            | 3          | 106        | 16        | 25            |
| 123 | Fenpropathrin         | Pyridaben-d <sub>13</sub> | GC   | 5.5                     | 10        | 112  | 6    | 25            | -10        | 112        | 13        | 25            |
| 124 | Fenpyroximate         | Atrazine-d <sub>5</sub>   | LC   | 8.2                     | <b>51</b> | 118  | 17   | 5             | <b>237</b> | 101        | <b>37</b> | -             |
| 125 | Fenthion              | Atrazine-d <sub>5</sub>   | GC   | 4.4                     | 4         | 99   | 6    | 25            | 5          | 94         | 17        | 25            |
|     | Fenthion              | Atrazine-d <sub>5</sub>   | LC   | 7.2                     | 3         | 107  | 15   | 25            | <b>21</b>  | <b>133</b> | <b>25</b> | -             |
| 126 | Fenthion sulfone      | Atrazine-d <sub>5</sub>   | GC   | 5.0                     | -9        | 101  | 10   | 25            | <b>42</b>  | 112        | 13        | 25            |
|     | Fenthion sulfone      | Atrazine-d <sub>5</sub>   | LC   | 5.8                     | 0         | 96   | 13   | 25            | 0          | <b>121</b> | 18        | 25            |
| 127 | Fipronil              | Atrazine-d <sub>5</sub>   | GC   | 4.6                     | 2         | 112  | 9    | 2.5           | 8          | 114        | 14        | 2.5           |
| 128 | Fipronyl desulfinyl   | Atrazine-d <sub>5</sub>   | GC   | 4.2                     | <b>23</b> | 99   | 9    | 2.5           | <b>-24</b> | 106        | <b>21</b> | -             |
| 129 | Fipronil sulfide      | Atrazine-d <sub>5</sub>   | GC   | 4.6                     | -5        | 102  | 7    | 2.5           | 15         | 103        | <b>21</b> | -             |
| 130 | Florfenicol           | Flunixin-d <sub>3</sub>   | LC   | 4.3                     | 3         | 101  | 20   | 50            | -6         | 96         | 13        | 50            |
| 131 | Flubendazole          | Flunixin-d <sub>3</sub>   | LC   | 5.6                     | -3        | 107  | 13   | 25            | 0          | 97         | 14        | 25            |
| 132 | Flubendazole, 2-amino | Flunixin-d <sub>3</sub>   | LC   | 4.3                     | 0         | 103  | 12   | 25            | 3          | 82         | 17        | 25            |
| 133 | Fludioxonil           | Atrazine-d <sub>5</sub>   | GC   | 4.8                     | -4        | 112  | 10   | 20            | 5          | 117        | 16        | 20            |
| 134 | Flufenacet            | Atrazine-d <sub>5</sub>   | GC   | 4.4                     | -7        | 100  | 8    | 25            | <b>28</b>  | 110        | 13        | 25            |
|     | Flufenacet            | Atrazine-d <sub>5</sub>   | LC   | 7.0                     | 11        | 96   | 16   | 25            | 1          | 100        | 13        | 25            |
| 135 | Flufenoxuron          | Atrazine-d <sub>5</sub>   | GC   | 4.0                     | -8        | 92   | 17   | 50            | <b>48</b>  | <b>68</b>  | <b>24</b> | -             |
| 136 | Flumequine            | Flunixin-d <sub>3</sub>   | LC   | 5.5                     | 9         | 103  | 13   | 100           | 7          | 101        | 10        | 100           |
| 137 | Fluopyram             | Atrazine-d <sub>5</sub>   | GC   | 4.6                     | 5         | 108  | 8    | 400           | -16        | 110        | 17        | 400           |
|     | Fluopyram             | Atrazine-d <sub>5</sub>   | LC   | 6.8                     | -3        | 104  | 11   | 400           | 2          | 102        | 13        | 400           |
| 138 | Fluoxastrobin         | Atrazine-d <sub>5</sub>   | GC   | 6.0                     | -6        | 108  | 10   | 10            | 15         | 107        | 20        | 10            |
|     | Fluoxastrobin         | Atrazine-d <sub>5</sub>   | LC   | 6.9                     | <b>22</b> | 100  | 13   | 10            | <b>21</b>  | 108        | 13        | 10            |
| 139 | Fluroxypyr-meptyl     | Atrazine-d <sub>5</sub>   | GC   | 5.5                     | 20        | 101  | 11   | 5             | -11        | 98         | 15        | 5             |
| 140 | Flusilazole           | Atrazine-d <sub>5</sub>   | GC   | 4.9                     | <b>25</b> | 107  | 9    | 10            | <b>-30</b> | 106        | 17        | 10            |
| 141 | Flutolanil            | Atrazine-d <sub>5</sub>   | LC   | 6.7                     | 6         | 103  | 10   | 25            | 4          | 101        | 13        | 25            |



| No. | Analyte                 | ISTD            | Tool | $t_R$<br>(min) | Goat       |            |           | LVL<br>(ng/g) | Lamb       |            |           | LVL<br>(ng/g) |
|-----|-------------------------|-----------------|------|----------------|------------|------------|-----------|---------------|------------|------------|-----------|---------------|
|     |                         |                 |      |                | %ME        | %Rec       | %RSD      |               | %ME        | %Rec       | %RSD      |               |
| 142 | Flutriafol              | Atrazine- $d_5$ | GC   | 4.8            | 1          | 100        | 10        | 5             | 10         | 117        | 16        | 5             |
|     | Flutriafol              | Atrazine- $d_5$ | LC   | 5.7            | 1          | 104        | 8         | 5             | -1         | 98         | 14        | 5             |
| 143 | Fluxapyroxad            | Atrazine- $d_5$ | LC   | 6.6            | -7         | 101        | 13        | 10            | -2         | 99         | 15        | 10            |
| 144 | Foramsulfuron           | Atrazine- $d_5$ | LC   | 5.4            | -20        | 93         | 15        | 10            | 0          | 91         | 19        | 10            |
| 145 | $\alpha$ -HCH           | Atrazine- $d_5$ | GC   | 3.8            | -2         | 98         | 7         | 5             | 4          | 100        | 16        | 5             |
| 146 | $\beta$ -HCH            | Atrazine- $d_5$ | GC   | 4.0            | -5         | 104        | 6         | 5             | <b>36</b>  | 102        | 16        | 5             |
| 147 | $\gamma$ -HCH (Lindane) | Atrazine- $d_5$ | GC   | 4.1            | -6         | 101        | 7         | 5             | 16         | 90         | 18        | 5             |
| 148 | $\delta$ -HCH           | Atrazine- $d_5$ | GC   | 4.0            | 4          | 102        | 6         | 5             | 5          | 93         | 16        | 5             |
| 149 | Heptachlor              | Atrazine- $d_5$ | GC   | 4.3            | -5         | 84         | 13        | 100           | <b>31</b>  | <b>64</b>  | 16        | 100           |
| 150 | Heptachlor epoxide      | Atrazine- $d_5$ | GC   | 4.7            | 4          | 96         | 8         | 100           | 14         | 86         | 17        | 100           |
| 151 | Hexachlorobenzene       | Atrazine- $d_5$ | GC   | 3.9            | 7          | 71         | 19        | 2.5           | 13         | 71         | <b>21</b> | -             |
| 152 | Hexaconazole            | Atrazine- $d_5$ | GC   | 4.8            | 9          | 101        | 11        | 5             | -5         | 100        | 17        | 5             |
| 153 | Hexythiazox             | Atrazine- $d_5$ | LC   | 8.1            | 0          | 95         | <b>24</b> | -             | <b>59</b>  | <b>132</b> | <b>42</b> | -             |
| 154 | Imazalil                | Atrazine- $d_5$ | GC   | 4.8            | -2         | 79         | 15        | 25            | <b>36</b>  | 73         | 15        | 25            |
|     | Imazalil                | Atrazine- $d_5$ | LC   | 5.3            | <b>-23</b> | 120        | 14        | 25            | 3          | 77         | <b>24</b> | -             |
| 155 | Imazapyr                | Atrazine- $d_5$ | LC   | 3.9            | 11         | 85         | 19        | 25            | -1         | 92         | 16        | 25            |
| 156 | Imidacloprid            | Atrazine- $d_5$ | LC   | 4.1            | 8          | 98         | 12        | 50            | 10         | 99         | 15        | 50            |
| 157 | Indoxacarb              | Atrazine- $d_5$ | LC   | 7.6            | <b>25</b>  | 110        | 15        | 25            | 11         | 91         | 18        | 25            |
| 158 | Iprodione               | Atrazine- $d_5$ | GC   | 5.2            | -6         | <b>127</b> | 13        | 50            | 12         | 103        | 17        | 50            |
|     | Iprodione               | Atrazine- $d_5$ | LC   | 7.0            | 5          | 104        | 13        | 50            | <b>-24</b> | 115        | <b>24</b> | -             |
| 159 | Iprovalicarb            | Atrazine- $d_5$ | LC   | 6.7            | 0          | 103        | 19        | 25            | 12         | 98         | 13        | 25            |
| 160 | Isocarbofos             | Atrazine- $d_5$ | GC   | 4.5            | <b>26</b>  | 108        | 8         | 25            | -20        | 105        | 15        | 25            |
| 161 | Kresoxim-methyl         | Atrazine- $d_5$ | GC   | 4.9            | 0          | 111        | 6         | 25            | 15         | 112        | 14        | 25            |
| 162 | Lasalosid A             | Flunixin- $d_3$ | LC   | 10.5           | <b>155</b> | <b>128</b> | 17        | 25            | <b>70</b>  | 80         | 19        | 25            |
| 163 | Levamisole              | Flunixin- $d_3$ | LC   | 3.2            | 6          | 96         | 18        | 5             | <b>-27</b> | 86         | 19        | 5             |
| 164 | Lincomycin              | Flunixin- $d_3$ | LC   | 3.3            | -7         | 94         | 12        | 50            | -3         | 87         | 14        | 50            |
| 165 | Linuron                 | Atrazine- $d_5$ | LC   | 6.4            | 10         | 107        | 14        | 5             | 20         | 99         | 18        | 5             |
| 166 | Lufenuron               | Atrazine- $d_5$ | LC   | 7.9            | <b>78</b>  | 111        | 17        | 15            | <b>91</b>  | 82         | <b>22</b> | -             |
| 167 | Mabuterol               | Flunixin- $d_3$ | LC   | 4.3            | 10         | 120        | 12        | 5             | 0          | 83         | <b>27</b> | -             |

| No. | Analyte              | ISTD                                    | Tool | t <sub>R</sub><br>(min) | Goat      |            |           | LVL<br>(ng/g) | Lamb       |            |           | LVL<br>(ng/g) |
|-----|----------------------|-----------------------------------------|------|-------------------------|-----------|------------|-----------|---------------|------------|------------|-----------|---------------|
|     |                      |                                         |      |                         | %ME       | %Rec       | %RSD      |               | %ME        | %Rec       | %RSD      |               |
| 168 | Malathion            | Atrazine-d <sub>5</sub>                 | GC   | 4.4                     | 10        | <b>53</b>  | <b>42</b> | -             | <b>38</b>  | 81         | <b>30</b> | -             |
| 169 | Malathion oxon       | Atrazine-d <sub>5</sub>                 | GC   | 4.2                     | 1         | 82         | 19        | 10            | <b>26</b>  | 92         | <b>25</b> | -             |
| 170 | Mebendazole          | Flunixin-d <sub>3</sub>                 | LC   | 5.4                     | 2         | 104        | 11        | 30            | -5         | 99         | 13        | 30            |
| 171 | Mebendazole, 2-amino | Flunixin-d <sub>3</sub>                 | LC   | 4.1                     | 1         | 101        | 12        | 30            | 2          | 83         | 20        | 30            |
| 172 | Meloxicam            | Flunixin-d <sub>3</sub>                 | LC   | 6.3                     | 10        | 102        | 10        | 10            | 5          | 97         | 11        | 10            |
| 173 | Mephosfolan          | Atrazine-d <sub>5</sub>                 | GC   | 4.6                     | 0         | 86         | 17        | 25            | 10         | 83         | 20        | 25            |
|     | Mephosfolan          | Atrazine-d <sub>5</sub>                 | LC   | 5.2                     | 1         | 106        | 10        | 25            | -7         | 94         | 13        | 25            |
| 174 | Metalaxyl            | Atrazine-d <sub>5</sub>                 | GC   | 4.3                     | -2        | 108        | 8         | 5             | 14         | 104        | 17        | 5             |
|     | Metalaxyl            | Atrazine-d <sub>5</sub>                 | LC   | 6.0                     | 3         | 111        | 11        | 5             | 1          | 94         | 13        | 5             |
| 175 | Metazachlor          | Atrazine-d <sub>5</sub>                 | LC   | 6.0                     | 1         | 109        | 11        | 25            | 6          | 94         | 12        | 25            |
|     | Metazochlor          | Atrazine-d <sub>5</sub>                 | GC   | 4.6                     | 2         | 113        | 5         | 25            | -2         | 113        | 12        | 25            |
| 176 | Metconazole          | Atrazine-d <sub>5</sub>                 | GC   | 5.5                     | 3         | 104        | 17        | 10            | 1          | 83         | <b>45</b> | -             |
|     | Metconazole          | Atrazine-d <sub>5</sub>                 | LC   | 7.2                     | 3         | 102        | 13        | 10            | 4          | 95         | 14        | 10            |
| 177 | Methamidophos        | Atrazine-d <sub>5</sub>                 | GC   | 2.5                     | 1         | 89         | 8         | 5             | -1         | 102        | <b>22</b> | -             |
| 178 | Methidathion         | Atrazine-d <sub>5</sub>                 | GC   | 4.7                     | 3         | 111        | 6         | 10            | 13         | 116        | 11        | 10            |
| 179 | Methiocarb           | Atrazine-d <sub>5</sub>                 | LC   | 6.4                     | -3        | 102        | 10        | 25            | 0          | 101        | 15        | 25            |
| 180 | Methiocarb sulfone   | Atrazine-d <sub>5</sub>                 | GC   | 4.3                     | -12       | 114        | 10        | 25            | 8          | <b>148</b> | <b>21</b> | -             |
| 181 | Methiocarb sulfoxide | Atrazine-d <sub>5</sub>                 | GC   | 4.3                     | -7        | 91         | 16        | 25            | <b>33</b>  | 91         | <b>21</b> | -             |
|     | Methiocarb sulfoxide | Atrazine-d <sub>5</sub>                 | LC   | 4.0                     | -6        | 105        | 13        | 25            | <b>-44</b> | <b>160</b> | <b>31</b> | -             |
| 182 | Methomyl             | Atrazine-d <sub>5</sub>                 | LC   | 3.4                     | <b>84</b> | <b>129</b> | 18        | 5             | <b>97</b>  | 89         | <b>21</b> | -             |
| 183 | Metribuzin           | Atrazine-d <sub>5</sub>                 | GC   | 4.2                     | 0         | 108        | 6         | 50            | 6          | 107        | 12        | 50            |
| 184 | Metsulfuron-methyl   | Atrazine-d <sub>5</sub>                 | LC   | 5.4                     | 2         | 102        | 13        | 5             | 0          | 94         | <b>22</b> | -             |
| 185 | Mirex                | <sup>13</sup> C <sub>12</sub> -p,p'-DDE | GC   | 5.7                     | 2         | 77         | 11        | 5             | 16         | <b>57</b>  | <b>24</b> | -             |
| 186 | Monensin             | Flunixin-d <sub>3</sub>                 | LC   | 9.3                     | <b>41</b> | 99         | 14        | 10            | 6          | 102        | <b>22</b> | -             |
| 187 | Monocrotophos        | Atrazine-d <sub>5</sub>                 | GC   | 3.7                     | 1         | 96         | 11        | 25            | 7          | 80         | 13        | 25            |
|     | Monocrotophos        | Atrazine-d <sub>5</sub>                 | LC   | 3.4                     | -9        | 98         | 17        | 25            | 1          | 93         | 16        | 25            |
| 188 | Monuron              | Atrazine-d <sub>5</sub>                 | LC   | 5.1                     | -8        | 99         | 12        | 5             | -7         | 96         | 13        | 5             |
| 189 | Morantel             | Flunixin-d <sub>3</sub>                 | LC   | 4.0                     | 4         | 98         | 13        | 50            | 2          | 83         | <b>23</b> | -             |
| 190 | Myclobutanil         | Atrazine-d <sub>5</sub>                 | GC   | 4.9                     | 4         | 107        | 8         | 5             | 12         | 109        | 18        | 5             |

| No.     | Analyte          | ISTD                                    | Tool | t <sub>R</sub><br>(min) | Goat       |            |           | LVL<br>(ng/g) | Lamb      |           |            | LVL<br>(ng/g) |
|---------|------------------|-----------------------------------------|------|-------------------------|------------|------------|-----------|---------------|-----------|-----------|------------|---------------|
|         |                  |                                         |      |                         | %ME        | %Rec       | %RSD      |               | %ME       | %Rec      | %RSD       |               |
| 191     | Nafcillin        | Flunixin-d <sub>3</sub>                 | LC   | 6.2                     | 7          | 103        | 11        | 150           | 12        | 103       | 9          | 150           |
| 192     | Nalidixic acid   | Flunixin-d <sub>3</sub>                 | LC   | 5.4                     | 13         | 104        | 15        | 25            | 3         | 102       | 11         | 25            |
| 193     | Naproxen         | Flunixin-d <sub>3</sub>                 | LC   | 6.2                     | 0          | 101        | <b>25</b> | 5             | -5        | 105       | 19         | 10            |
| 194     | Nitenpyram       | Atrazine-d <sub>5</sub>                 | GC   | 4.1                     | -2         | 118        | 7         | 50            | <b>23</b> | 105       | 11         | 50            |
| 195     | Nitroxinil       | Flunixin-d <sub>3</sub>                 | LC   | 5.4                     | 0          | <b>129</b> | <b>33</b> | -             | 0         | 71        | <b>537</b> | -             |
| 196     | Norflurazon      | Atrazine-d <sub>5</sub>                 | LC   | 6.0                     | 6          | 101        | 19        | 5             | 1         | 101       | <b>22</b>  | -             |
| 197     | Novaluron        | Atrazine-d <sub>5</sub>                 | LC   | 7.6                     | <b>34</b>  | 119        | 14        | 100           | <b>40</b> | 87        | 20         | 50            |
| 198     | Omethoate        | Atrazine-d <sub>5</sub>                 | GC   | 3.5                     | -8         | 85         | 11        | 25            | -10       | 70        | 13         | 25            |
|         | Omethoate        | Atrazine-d <sub>5</sub>                 | LC   | 2.7                     | <b>-26</b> | 107        | <b>24</b> | -             | 7         | 90        | 19         | 25            |
| 199     | Ormetoprim       | Flunixin-d <sub>3</sub>                 | LC   | 3.6                     | 1          | 103        | 13        | 50            | 1         | 89        | 16         | 50            |
| 200     | Oxacillin        | Flunixin-d <sub>3</sub>                 | LC   | 5.8                     | 3          | 109        | 10        | 150           | 1         | 102       | 9          | 150           |
| 201     | Oxadiazon        | Atrazine-d <sub>5</sub>                 | GC   | 4.8                     | -20        | 91         | 6         | 25            | -5        | 89        | 19         | 25            |
| 202     | Oxfendazole      | Flunixin-d <sub>3</sub>                 | LC   | 4.6                     | <b>28</b>  | 106        | 10        | 25            | -3        | 105       | 12         | 25            |
| 203     | Oxibendazole     | Flunixin-d <sub>3</sub>                 | LC   | 4.6                     | 5          | 101        | 12        | 50            | 7         | 92        | 16         | 50            |
| 204     | Oxolinic Acid    | Flunixin-d <sub>3</sub>                 | LC   | 4.7                     | 14         | 105        | 16        | 100           | 3         | 103       | 9          | 100           |
| 205     | Oxychlorthane    | Atrazine-d <sub>5</sub>                 | GC   | 4.7                     | -4         | 88         | 12        | 25            | <b>28</b> | 76        | 15         | 25            |
| 206     | Oxyfluorfen      | Atrazine-d <sub>5</sub>                 | GC   | 4.8                     | 7          | 107        | 11        | 25            | <b>30</b> | 95        | 13         | 25            |
| 207     | Oxytetracycline  | Flunixin-d <sub>3</sub>                 | LC   | 3.6                     | 16         | <b>63</b>  | 19        | 50            | 10        | 72        | 15         | 50            |
| 208     | Paclobutrazol    | Atrazine-d <sub>5</sub>                 | GC   | 4.7                     | -3         | 100        | 10        | 250           | 7         | 118       | 15         | 250           |
| 209     | Parathion        | Atrazine-d <sub>5</sub>                 | GC   | 4.5                     | 0          | 111        | 7         | 25            | 7         | 106       | 12         | 25            |
| 210     | Parathion-methyl | Atrazine-d <sub>5</sub>                 | GC   | 4.3                     | -10        | 110        | 7         | 25            | 12        | 111       | 14         | 25            |
| 211     | PCB 28           | <sup>13</sup> C <sub>12</sub> -p,p'-DDE | GC   | 4.2                     | 3          | 111        | 7         | 2.5           | 1         | 98        | 15         | 2.5           |
| 212     | PCB 52           | <sup>13</sup> C <sub>12</sub> -p,p'-DDE | GC   | 4.5                     | -1         | 109        | 9         | 2.5           | -2        | 97        | 13         | 2.5           |
| 213,214 | PCB 77+81        | <sup>13</sup> C <sub>12</sub> -p,p'-DDE | GC   | 4.9                     | 7          | 79         | 9         | 2.5           | 0         | 76        | 13         | 2.5           |
| 215     | PCB 101          | <sup>13</sup> C <sub>12</sub> -p,p'-DDE | GC   | 4.7                     | -8         | 94         | 9         | 2.5           | 11        | 82        | 13         | 2.5           |
| 216     | PCB 105          | <sup>13</sup> C <sub>12</sub> -p,p'-DDE | GC   | 5.1                     | 2          | 84         | 12        | 2.5           | 13        | 70        | 15         | 2.5           |
| 217,218 | PCB 123+118      | <sup>13</sup> C <sub>12</sub> -p,p'-DDE | GC   | 5.0                     | 6          | 73         | 13        | 2.5           | -2        | <b>60</b> | 18         | 2.5           |
| 219     | PCB 126          | <sup>13</sup> C <sub>12</sub> -PCB 153  | GC   | 5.2                     | 5          | 88         | 12        | 2.5           | <b>27</b> | 94        | 16         | 2.5           |
| 220     | PCB 138          | <sup>13</sup> C <sub>12</sub> -p,p'-DDE | GC   | 5.2                     | -4         | 77         | 12        | 2.5           | <b>26</b> | <b>62</b> | 15         | 2.5           |

| No.     | Analyte                          | ISTD                                   | Tool | t <sub>R</sub><br>(min) | Goat       |           |           | LVL<br>(ng/g) | Lamb      |            |           | LVL<br>(ng/g) |
|---------|----------------------------------|----------------------------------------|------|-------------------------|------------|-----------|-----------|---------------|-----------|------------|-----------|---------------|
|         |                                  |                                        |      |                         | %ME        | %Rec      | %RSD      |               | %ME       | %Rec       | %RSD      |               |
| 221     | PCB 153                          | <sup>13</sup> C <sub>12</sub> -PCB 153 | GC   | 5.1                     | 7          | 107       | 7         | 2.5           | 10        | 105        | 13        | 2.5           |
| 222,223 | PCB 156+157                      | <sup>13</sup> C <sub>12</sub> -PCB 153 | GC   | 5.4                     | 5          | 102       | 9         | 2.5           | 9         | 97         | 15        | 2.5           |
| 224     | PCB 169                          | <sup>13</sup> C <sub>12</sub> -PCB 153 | GC   | 5.6                     | 1          | <b>56</b> | 13        | 2.5           | -6        | <b>58</b>  | <b>21</b> | -             |
| 225     | PCB 180                          | <sup>13</sup> C <sub>12</sub> -PCB 153 | GC   | 5.6                     | -1         | 93        | 10        | 2.5           | -2        | 89         | 17        | 2.5           |
| 226     | PCB 189                          | <sup>13</sup> C <sub>12</sub> -PCB 153 | GC   | 5.7                     | -3         | <b>66</b> | 12        | 2.5           | -9        | <b>59</b>  | <b>22</b> | -             |
| 227     | Penconazole                      | Atrazine-d <sub>5</sub>                | GC   | 4.6                     | 9          | 105       | 7         | 25            | -5        | 99         | 17        | 25            |
| 228     | Pendimethalin                    | Atrazine-d <sub>5</sub>                | GC   | 4.6                     | 11         | 104       | 10        | 5             | -2        | 87         | 12        | 5             |
| 229     | Penicillin G                     | Penicillin G-d <sub>7</sub>            | LC   | 5.3                     | 0          | 104       | 19        | 25            | 3         | 110        | 14        | 25            |
| 230     | Penoxsulam                       | Atrazine-d <sub>5</sub>                | LC   | 5.9                     | 10         | 102       | 12        | 10            | <b>22</b> | 101        | 17        | 10            |
| 231     | Pentachloroaniline               | Atrazine-d <sub>5</sub>                | GC   | 4.2                     | 8          | 87        | 13        | 10            | -5        | 90         | 17        | 10            |
| 232     | Permethrins ( <i>cis+trans</i> ) | Pyridaben-d <sub>13</sub>              | GC   | 5.8                     | 8          | 96        | 7         | 25            | 0         | 86         | 13        | 25            |
| 233     | Phenothrin                       | Pyridaben-d <sub>13</sub>              | GC   | 5.4                     | -1         | 100       | 9         | 25            | -4        | 95         | 15        | 25            |
| 234     | Phorate                          | Atrazine-d <sub>5</sub>                | GC   | 4.0                     | -4         | 101       | 7         | 10            | -3        | 96         | 15        | 10            |
| 235     | Phorate Sulfone                  | Atrazine-d <sub>5</sub>                | GC   | 4.4                     | -3         | 115       | 7         | 10            | -2        | 116        | 14        | 10            |
|         | Phorate sulfone                  | Atrazine-d <sub>5</sub>                | LC   | 6.1                     | 6          | 119       | <b>21</b> | -             | 6         | 101        | <b>28</b> | -             |
| 236     | Phorate sulfoxide                | Atrazine-d <sub>5</sub>                | LC   | 5.8                     | 6          | 109       | 11        | 10            | 6         | 102        | 17        | 10            |
| 237     | Phosalone                        | Atrazine-d <sub>5</sub>                | GC   | 5.5                     | 0          | 106       | 11        | 5             | 1         | 101        | 15        | 5             |
|         | Phosalone                        | Atrazine-d <sub>5</sub>                | LC   | 7.5                     | <b>-33</b> | 120       | <b>30</b> | -             | 13        | 95         | 16        | 5             |
| 238     | Phosmet                          | Atrazine-d <sub>5</sub>                | GC   | 5.4                     | 4          | 98        | 13        | 50            | 17        | 101        | 17        | 50            |
| 239     | Picoxystrobin                    | Atrazine-d <sub>5</sub>                | LC   | 7.1                     | 16         | 87        | <b>28</b> | -             | 0         | 94         | 20        | 5             |
| 240     | Piperonyl butoxide               | Atrazine-d <sub>5</sub>                | GC   | 5.2                     | -2         | 100       | 12        | 50            | 2         | 103        | 15        | 50            |
| 241     | Pirimicarb                       | Atrazine-d <sub>5</sub>                | GC   | 4.1                     | -3         | 108       | 5         | 25            | 0         | 109        | 13        | 25            |
| 242     | Pirimiphos                       | Atrazine-d <sub>5</sub>                | GC   | 4.5                     | 8          | 102       | 7         | 5             | -20       | 105        | 9         | 5             |
|         | Pirimiphos                       | Atrazine-d <sub>5</sub>                | LC   | 7.9                     | -3         | 106       | 19        | 5             | <b>23</b> | <b>171</b> | <b>36</b> | -             |
| 243     | Pirlimycin                       | Flunixin-d <sub>3</sub>                | LC   | 6.9                     | -3         | 94        | 10        | 50            | -7        | 76         | 19        | 50            |
| 244     | Piroxicam                        | Flunixin-d <sub>3</sub>                | LC   | 4.4                     | 10         | 100       | 17        | 50            | 4         | 99         | 11        | 50            |
| 245     | Primisulfuron-methyl             | Atrazine-d <sub>5</sub>                | LC   | 6.7                     | 1          | 101       | 13        | 5             | 4         | 96         | 15        | 5             |
| 246     | Prochloraz                       | Atrazine-d <sub>5</sub>                | GC   | 5.8                     | 1          | 80        | 13        | 50            | 4         | <b>44</b>  | <b>23</b> | -             |
|         | Prochloraz                       | Atrazine-d <sub>5</sub>                | LC   | 6.9                     | 2          | 105       | 16        | 50            | -6        | 87         | 16        | 50            |

| No. | Analyte          | ISTD                       | Tool | t <sub>R</sub><br>(min) | Goat       |           |           | LVL<br>(ng/g) | Lamb       |      |           | LVL<br>(ng/g) |
|-----|------------------|----------------------------|------|-------------------------|------------|-----------|-----------|---------------|------------|------|-----------|---------------|
|     |                  |                            |      |                         | %ME        | %Rec      | %RSD      |               | %ME        | %Rec | %RSD      |               |
| 247 | Profenofos       | Atrazine-d <sub>5</sub>    | GC   | 4.8                     | 4          | 97        | 10        | 25            | 12         | 99   | 13        | 25            |
|     | Profenofos       | Atrazine-d <sub>5</sub>    | LC   | 7.8                     | 4          | 112       | 15        | 25            | -4         | 103  | 20        | 25            |
| 248 | Prometryn        | Atrazine-d <sub>5</sub>    | GC   | 4.3                     | 1          | 104       | 6         | 25            | <b>23</b>  | 111  | 10        | 25            |
| 249 | Propachlor       | Atrazine-d <sub>5</sub>    | GC   | 3.6                     | -5         | <b>58</b> | <b>51</b> | -             | <b>45</b>  | 79   | <b>40</b> | -             |
| 250 | Propamocarb      | Atrazine-d <sub>5</sub>    | LC   | 2.7                     | 7          | 100       | 15        | 5             | -10        | 85   | 17        | 5             |
| 251 | Propanil         | Atrazine-d <sub>5</sub>    | GC   | 4.2                     | -3         | 97        | 10        | 5             | <b>36</b>  | 118  | 19        | 5             |
|     | Propanil         | Atrazine-d <sub>5</sub>    | LC   | 6.3                     | 1          | 103       | 10        | 5             | 5          | 96   | 13        | 5             |
| 252 | Propetamphos     | Atrazine-d <sub>5</sub>    | GC   | 3.9                     | -2         | 107       | 6         | 25            | <b>-36</b> | 110  | 16        | 25            |
| 253 | Propiconazole    | Atrazine-d <sub>5</sub>    | GC   | 5.2                     | 1          | 102       | 11        | 25            | 8          | 98   | 18        | 25            |
|     | Propiconazole    | Atrazine-d <sub>5</sub>    | LC   | 7.2                     | -7         | 104       | 10        | 25            | 3          | 91   | 13        | 25            |
| 254 | Propoxur         | Atrazine-d <sub>5</sub>    | GC   | 3.6                     | -7         | 108       | 7         | 25            | <b>74</b>  | 111  | 12        | 25            |
| 255 | Propoxycarbazone | Atrazine-d <sub>5</sub>    | LC   | 5.9                     | 2          | 106       | 11        | 25            | -1         | 97   | 16        | 25            |
| 256 | Prosulfuron      | Atrazine-d <sub>5</sub>    | LC   | 6.5                     | 0          | 102       | 13        | 10            | 12         | 101  | 15        | 10            |
| 257 | Pyraclofos       | Pyridaben-d <sub>13</sub>  | GC   | 5.7                     | 1          | 94        | 13        | 25            | 17         | 80   | 17        | 25            |
| 258 | Pyraclostrobin   | Atrazine-d <sub>5</sub>    | LC   | 7.4                     | 9          | 104       | 17        | 25            | -7         | 97   | 20        | 25            |
|     | Pyraclostrobin   | Pyridaben-d <sub>13</sub>  | GC   | 6.4                     | -1         | 79        | 18        | 25            | 6          | 80   | <b>39</b> | -             |
| 259 | Pyrazophos       | Pyridaben-d <sub>13</sub>  | GC   | 5.6                     | -3         | 97        | 12        | 5             | 1          | 114  | 14        | 5             |
| 260 | Pyridaben        | Pyridaben-d <sub>13</sub>  | GC   | 5.8                     | -5         | 98        | 6         | 10            | 15         | 104  | 12        | 10            |
|     | Pyridaben        | Pyridaben-d <sub>13</sub>  | LC   | 8.4                     | -3         | 98        | 20        | 10            | <b>34</b>  | 99   | 13        | 10            |
| 261 | Pyrifenox        | Atrazine-d <sub>5</sub>    | GC   | 4.9                     | 2          | 88        | 14        | 10            | 3          | 104  | 15        | 10            |
| 262 | Pyrimethanil     | Atrazine-d <sub>5</sub>    | GC   | 4.0                     | -10        | 96        | 6         | 50            | 18         | 95   | 11        | 50            |
|     | Pyrimethanil     | Atrazine-d <sub>5</sub>    | LC   | 5.6                     | 9          | 111       | 11        | 50            | <b>-29</b> | 102  | 17        | 50            |
| 263 | Pyriproxyfen     | Atrazine-d <sub>5</sub>    | GC   | 5.5                     | -3         | 103       | 9         | 25            | 3          | 103  | 18        | 25            |
| 264 | Quinclorac       | Atrazine-d <sub>5</sub>    | LC   | 5.1                     | 6          | 109       | <b>21</b> | -             | -2         | 96   | 15        | 5             |
| 265 | Quintozene       | Atrazine-d <sub>5</sub>    | GC   | 4.0                     | -6         | 87        | 12        | 5             | 10         | 78   | 17        | 5             |
| 266 | Quizalofop       | Atrazine-d <sub>5</sub>    | LC   | 7.8                     | <b>-25</b> | 98        | 15        | 25            | 9          | 112  | 13        | 25            |
| 267 | Ractopamine      | Ractopamine-d <sub>3</sub> | LC   | 5.6                     | 3          | 106       | 12        | 5             | 0          | 103  | 10        | 5             |
| 268 | Ritodrine        | Flunixin-d <sub>3</sub>    | LC   | 9.0                     | 3          | 94        | 17        | 5             | <b>-25</b> | 90   | 17        | 5             |
| 269 | Ronidazole       | Flunixin-d <sub>3</sub>    | LC   | 3.2                     | 8          | 102       | 15        | 5             | 2          | 83   | 17        | 5             |

| No. | Analyte                 | ISTD                                         | Tool | t <sub>R</sub><br>(min) | Goat       |            |           | LVL<br>(ng/g) | Lamb       |            |           | LVL<br>(ng/g) |
|-----|-------------------------|----------------------------------------------|------|-------------------------|------------|------------|-----------|---------------|------------|------------|-----------|---------------|
|     |                         |                                              |      |                         | %ME        | %Rec       | %RSD      |               | %ME        | %Rec       | %RSD      |               |
| 270 | Saflufenacil            | Atrazine-d <sub>5</sub>                      | LC   | 6.5                     | -7         | 97         | 17        | 5             | 5          | 95         | 17        | 5             |
| 271 | Sethoxydim              | Atrazine-d <sub>5</sub>                      | LC   | 8.0                     | 14         | 88         | 17        | 100           | <b>69</b>  | 89         | 20        | 100           |
| 272 | Simazine                | Atrazine-d <sub>5</sub>                      | GC   | 3.9                     | 4          | 103        | 6         | 5             | -4         | 102        | 12        | 5             |
|     | Simazine                | Atrazine-d <sub>5</sub>                      | LC   | 5.2                     | -7         | 103        | 12        | 5             | -6         | 97         | 12        | 5             |
| 273 | Spinetoram              | Atrazine-d <sub>5</sub>                      | LC   | 7.0                     | 20         | 102        | <b>22</b> | -             | 12         | 80         | <b>24</b> | -             |
| 274 | Spinosyn A              | Atrazine-d <sub>5</sub>                      | LC   | 6.8                     | -6         | <b>121</b> | 13        | 100           | 9          | 82         | <b>24</b> | -             |
| 275 | Spinosyn D              | Atrazine-d <sub>5</sub>                      | LC   | 6.9                     | <b>26</b>  | 102        | 18        | 100           | 19         | 82         | <b>24</b> | -             |
| 276 | Spirodiclofen           | Pyridaben-d <sub>13</sub>                    | GC   | 5.8                     | 4          | 98         | 10        | 5             | -14        | 95         | 16        | 5             |
| 277 | Spiromesifen            | Atrazine-d <sub>5</sub>                      | GC   | 5.3                     | 2          | 92         | 12        | 5             | 1          | 90         | 14        | 5             |
| 278 | Sulfabromomethazine     | <sup>13</sup> C <sub>6</sub> -Sulfamethazine | LC   | 3.1                     | 0          | 104        | 13        | 50            | 7          | 95         | 10        | 50            |
| 279 | Sulfachloropyridazine   | <sup>13</sup> C <sub>6</sub> -Sulfamethazine | LC   | 5.4                     | -7         | 99         | 11        | 50            | -3         | 96         | 8         | 50            |
| 280 | Sulfaclozine            | <sup>13</sup> C <sub>6</sub> -Sulfamethazine | LC   | 4.1                     | 12         | 108        | 10        | 50            | -3         | 98         | 10        | 50            |
| 281 | Sulfadiazine            | <sup>13</sup> C <sub>6</sub> -Sulfamethazine | LC   | 4.6                     | 3          | 107        | 13        | 50            | 15         | 98         | 9         | 50            |
| 282 | Sulfadimethoxine        | <sup>13</sup> C <sub>6</sub> -Sulfamethazine | LC   | 3.1                     | 4          | 110        | 11        | 50            | 2          | 97         | 9         | 50            |
| 283 | Sulfadoxine             | <sup>13</sup> C <sub>6</sub> -Sulfamethazine | LC   | 4.7                     | 0          | 104        | 9         | 50            | 3          | 101        | 9         | 50            |
| 284 | Sulfaethoxypyridazine   | <sup>13</sup> C <sub>6</sub> -Sulfamethazine | LC   | 4.2                     | -9         | 105        | 10        | 50            | 0          | 98         | 9         | 50            |
| 285 | Sulfamerazine           | <sup>13</sup> C <sub>6</sub> -Sulfamethazine | LC   | 4.4                     | 2          | 101        | 12        | 50            | 19         | 96         | 9         | 50            |
| 286 | Sulfamethazine          | <sup>13</sup> C <sub>6</sub> -Sulfamethazine | LC   | 3.8                     | 0          | 104        | 12        | 50            | 5          | 102        | 9         | 50            |
| 287 | Sulfamethizole          | <sup>13</sup> C <sub>6</sub> -Sulfamethazine | LC   | 3.5                     | -4         | 100        | 11        | 50            | 4          | 95         | 9         | 50            |
| 288 | Sulfamethoxazole        | <sup>13</sup> C <sub>6</sub> -Sulfamethazine | LC   | 3.7                     | -6         | 104        | 11        | 50            | 8          | 97         | 9         | 50            |
| 289 | Sulfamethoxy-pyridazine | <sup>13</sup> C <sub>6</sub> -Sulfamethazine | LC   | 4.2                     | -1         | 99         | 11        | 50            | 6          | 99         | 8         | 50            |
| 290 | Sulfamonomethoxine      | <sup>13</sup> C <sub>6</sub> -Sulfamethazine | LC   | 4.0                     | 6          | 103        | 11        | 50            | 6          | 100        | 8         | 50            |
| 291 | Sulfanilamide           | <sup>13</sup> C <sub>6</sub> -Sulfamethazine | LC   | 3.8                     | <b>-55</b> | <b>154</b> | <b>31</b> | -             | <b>-83</b> | <b>253</b> | <b>31</b> | -             |
| 292 | Sulfaquinoxaline        | <sup>13</sup> C <sub>6</sub> -Sulfamethazine | LC   | 1.5                     | -4         | 106        | 11        | 50            | 4          | 95         | 9         | 50            |
| 293 | Sulfathiazole           | <sup>13</sup> C <sub>6</sub> -Sulfamethazine | LC   | 4.8                     | 5          | 105        | 12        | 50            | 15         | 94         | 9         | 50            |
| 294 | Sulfisoxazole           | <sup>13</sup> C <sub>6</sub> -Sulfamethazine | LC   | 3.3                     | -6         | 99         | 13        | 50            | 6          | 95         | 9         | 50            |
| 295 | Sulfoxaflor             | Atrazine-d <sub>5</sub>                      | LC   | 4.7                     | <b>34</b>  | 107        | 12        | 150           | <b>-22</b> | 92         | 14        | 150           |
| 296 | Sulprofos               | Atrazine-d <sub>5</sub>                      | GC   | 5.1                     | -2         | 99         | 9         | 25            | -4         | 98         | 12        | 25            |
| 297 | Tebuconazole            | Atrazine-d <sub>5</sub>                      | GC   | 5.2                     | -5         | 89         | 13        | 50            | 3          | 95         | 17        | 50            |

| No. | Analyte                   | ISTD                                         | Tool | t <sub>R</sub><br>(min) | Goat        |            |            | LVL<br>(ng/g) | Lamb      |            |           | LVL<br>(ng/g) |
|-----|---------------------------|----------------------------------------------|------|-------------------------|-------------|------------|------------|---------------|-----------|------------|-----------|---------------|
|     |                           |                                              |      |                         | %ME         | %Rec       | %RSD       |               | %ME       | %Rec       | %RSD      |               |
| 298 | Tebuthiuron               | Atrazine-d <sub>5</sub>                      | GC   | 3.3                     | -3          | 118        | 6          | 5             | <b>37</b> | 106        | 13        | 5             |
|     | Tebuthiuron               | Atrazine-d <sub>5</sub>                      | LC   | 5.1                     | 4           | 99         | 10         | 5             | 4         | 100        | 13        | 5             |
| 299 | Tefluthrin                | Atrazine-d <sub>5</sub>                      | GC   | 4.0                     | 12          | 83         | 8          | 25            | 3         | 95         | 10        | 25            |
| 300 | Terbufos                  | Atrazine-d <sub>5</sub>                      | GC   | 4.0                     | -4          | 94         | 9          | 5             | -2        | 106        | 11        | 5             |
| 301 | Tetrachlorvinphos         | Atrazine-d <sub>5</sub>                      | GC   | 4.7                     | 2           | 94         | 8          | 25            | -18       | 94         | 10        | 25            |
|     | Tetrachlorvinphos         | Atrazine-d <sub>5</sub>                      | LC   | 7.1                     | 5           | 96         | 14         | 25            | 3         | 95         | 14        | 25            |
| 302 | Tetraconazole             | Atrazine-d <sub>5</sub>                      | GC   | 4.5                     | -9          | <b>163</b> | <b>23</b>  | -             | <b>35</b> | 117        | 14        | 250           |
|     | Tetraconazole             | Atrazine-d <sub>5</sub>                      | LC   | 6.8                     | -3          | 106        | 11         | 250           | 1         | 94         | 14        | 250           |
| 303 | Tetracycline              | <sup>13</sup> C <sub>6</sub> -Sulfamethazine | LC   | 4.3                     | 3           | 75         | 15         | 50            | 13        | 77         | 12        | 50            |
| 304 | Tetrahydrophthalimide     | None                                         | GC   | 3.2                     | -5          | <b>213</b> | 20         | 45            | <b>30</b> | <b>130</b> | 14        | 45            |
| 305 | Tetramethrin              | Atrazine-d <sub>5</sub>                      | GC   | 5.3                     | -4          | 100        | 14         | 25            | <b>33</b> | 95         | 19        | 25            |
| 306 | Thiabendazole             | Atrazine-d <sub>5</sub>                      | LC   | 3.3                     | -9          | 94         | 15         | 25            | 5         | 92         | 15        | 25            |
| 307 | Thiacloprid               | Atrazine-d <sub>5</sub>                      | LC   | 4.7                     | 0           | 105        | 12         | 50            | 4         | 98         | 13        | 50            |
| 308 | Thiamethoxam              | Atrazine-d <sub>5</sub>                      | GC   | 4.5                     | -9          | 80         | 20         | 10            | 6         | 90         | 20        | 20            |
| 309 | Thiamphenicol             | Flunixin-d <sub>3</sub>                      | LC   | 3.7                     | 6           | 98         | 16         | 25            | 0         | 97         | 13        | 25            |
| 310 | Thidiazuron               | Atrazine-d <sub>5</sub>                      | LC   | 5.1                     | 0           | 102        | 14         | 5             | 4         | 95         | 16        | 5             |
| 311 | Thiencarbazone-methyl     | Atrazine-d <sub>5</sub>                      | LC   | 5.3                     | -6          | 92         | 19         | 5             | 10        | 93         | <b>26</b> | -             |
| 312 | Thiobencarb               | Atrazine-d <sub>5</sub>                      | GC   | 4.4                     | 4           | 95         | 6          | 5             | 1         | 107        | 9         | 5             |
| 313 | Thiophanate-methyl        | Atrazine-d <sub>5</sub>                      | LC   | 5.3                     | 3           | 100        | 12         | 25            | -1        | 86         | <b>21</b> | -             |
| 314 | Tiamulin                  | Flunixin-d <sub>3</sub>                      | LC   | 3.7                     | 1           | <b>130</b> | 10         | 50            | -6        | 73         | <b>30</b> | -             |
| 315 | Tilmicosin                | Flunixin-d <sub>3</sub>                      | LC   | 3.1                     | <b>44</b>   | 103        | 11         | 25            | <b>33</b> | 75         | 16        | 25            |
| 316 | Tolyfluanid               | Atrazine-d <sub>5</sub>                      | GC   | 4.6                     | 4           | <b>5</b>   | <b>174</b> | -             | 2         | <b>44</b>  | <b>52</b> | -             |
| 317 | Triadimefon               | Atrazine-d <sub>5</sub>                      | GC   | 4.6                     | <b>-105</b> | 110        | 7          | 5             | 7         | 112        | 16        | 5             |
| 318 | Triadimenol               | Atrazine-d <sub>5</sub>                      | GC   | 4.6                     | -8          | 96         | 11         | 5             | <b>59</b> | 114        | 18        | 5             |
|     | Triadimenol               | Atrazine-d <sub>5</sub>                      | LC   | 6.4                     | -9          | 106        | 11         | 5             | 0         | 99         | 13        | 5             |
| 319 | Triazophos                | Atrazine-d <sub>5</sub>                      | GC   | 5.1                     | -4          | 104        | 12         | 5             | -4        | 116        | <b>23</b> | -             |
| 320 | Tribufos                  | Atrazine-d <sub>5</sub>                      | GC   | 4.8                     | -5          | 88         | 11         | 5             | 13        | 98         | 16        | 5             |
| 321 | Triclabendazole           | Flunixin-d <sub>3</sub>                      | LC   | 4.6                     | 6           | 113        | 11         | 112           | <b>21</b> | 82         | <b>28</b> | -             |
| 322 | Triclabendazole sulfoxide | Flunixin-d <sub>3</sub>                      | LC   | 7.4                     | 2           | 105        | 12         | 112           | 2         | 97         | <b>21</b> | -             |

| No. | Analyte         | ISTD                       | Tool | $t_R$<br>(min) | Goat |      |      | LVL<br>(ng/g) | Lamb       |      |           | LVL<br>(ng/g) |
|-----|-----------------|----------------------------|------|----------------|------|------|------|---------------|------------|------|-----------|---------------|
|     |                 |                            |      |                | %ME  | %Rec | %RSD |               | %ME        | %Rec | %RSD      |               |
| 323 | Tridiphane      | Atrazine- $d_5$            | GC   | 4.3            | -2   | 98   | 9    | 25            | 4          | 77   | 13        | 25            |
| 324 | Trifloxystrobin | Atrazine- $d_5$            | GC   | 5.1            | -3   | 109  | 10   | 20            | 16         | 117  | 16        | 20            |
|     | Trifloxystrobin | Atrazine- $d_5$            | LC   | 7.6            | 6    | 108  | 13   | 20            | 4          | 102  | 17        | 20            |
| 325 | Triflumizole    | Atrazine- $d_5$            | GC   | 4.6            | 1    | 101  | 9    | 25            | 14         | 115  | 12        | 25            |
| 326 | Triflumuron     | Atrazine- $d_5$            | LC   | 7.3            | 9    | 114  | 14   | 5             | 3          | 93   | <b>21</b> | -             |
| 327 | Trifluralin     | Atrazine- $d_5$            | GC   | 3.7            | 4    | 104  | 7    | 5             | 5          | 89   | 14        | 5             |
| 328 | Trimethoprim    | $^{13}C_6$ -Sulfamethazine | LC   | 7.0            | -3   | 103  | 14   | 25            | 4          | 93   | 13        | 25            |
| 329 | Tylosin         | Flunixin- $d_3$            | LC   | 3.4            | 4    | 99   | 17   | 50            | <b>-35</b> | 104  | <b>25</b> | -             |
| 330 | Vinclozolin     | Atrazine- $d_5$            | GC   | 4.2            | 2    | 94   | 6    | 5             | <b>23</b>  | 102  | 19        | 5             |
